# Supplementary material for: Loss of Ciliary Gene Bbs8 Results in Physiological Defects in the Retinal Pigment Epithelium
Source: Front Cell Dev Biol. 2021 Feb 18;9:607121. doi: 10.3389/fcell.2021.607121 (PMC7930748; doi:10.3389/fcell.2021.607121)
Supplement: Supplementary Table 2 — Differentially expressed genes (DEGs) significantly regulated at P29. Significance defined by using False Discovery Rate (FDR) < 0.05 as threshold. 1,056 genes induced in red; and 1220 inhibited in green. [file Table_2.XLSX]

## Sheet: results_fdr5%_2276
Supplementary Table 2: Differentially expressed genes (DEGs) significantly regulated at P29. Significance defined by using False Discovery Rate (FDR)<0,05 as threshold. 1056 genes induced in red; and 1220 inhibited in green
EnsemblGeneID	Symbol	CTRL_BBS8_1	CTRL_BBS8_2	CTRL_BBS8_3	CTRL_BBS8_4	KO_BBS8_1	KO_BBS8_2	KO_BBS8_3	KO_BBS8_4	logFC_KOvsCTR_P29	FDR_KOvsCTR_P29
ENSMUSG00000048582	Gja3	1.62	5.48	1.6	2.15	0	0	0	0	-5.92	0.000175361
ENSMUSG00000025945	Crygf	24.89	11.33	16.83	15.77	0	0	0.83	0.37	-5.842	4.05507e-21
ENSMUSG00000050217	Lgsn	7.44	5.85	4.01	3.94	1.67	0	0	0	-5.526	4.69662e-07
ENSMUSG00000110020	Gm45441	4.53	4.38	6.01	3.58	0	0	2.07	0	-5.271	2.60371e-06
ENSMUSG00000052353	Cemip	1.94	1.1	1.2	1.43	0	0	0	0	-5.02	0.00295853
ENSMUSG00000086262	A930031H19Rik	5.5	3.65	1.2	3.94	2.09	0	0	0	-4.91	0.000252649
ENSMUSG00000006154	Eps8l1	11.64	8.4	10.82	11.82	0.84	0	1.24	0	-4.527	2.82269e-13
ENSMUSG00000033508	Asprv1	2.91	2.56	3.61	1.43	0.42	0	0	0	-4.515	0.000653067
ENSMUSG00000097248	Gm2694	1.94	2.19	2.4	3.22	0	0	0.41	0	-4.383	0.000786312
ENSMUSG00000072852	2310040G07Rik	3.56	3.29	1.2	3.22	0	1.1	0	0	-4.381	0.00130798
ENSMUSG00000025161	Slc16a3	19.4	23.75	22.04	22.21	0	1.47	0.83	6.58	-4.216	4.87232e-21
ENSMUSG00000087086	Gm13269	6.14	2.56	2.4	5.37	0	0.37	0.41	0	-4.2	6.8944e-05
ENSMUSG00000044429	Cryga	15.52	9.5	6.81	13.26	0	1.47	0.83	0.37	-4.105	3.5997e-11
ENSMUSG00000020067	Mypn	1.62	1.83	2.4	1.79	0.42	0	0	0	-4.059	0.00382548
ENSMUSG00000038403	Hfe2	4.2	0.37	3.61	1.07	0	0	4.55	0	-3.982	0.0204037
ENSMUSG00000001983	Taco1	3.88	1.1	2.81	1.43	0	5.14	0	0	-3.87	0.0113906
ENSMUSG00000043631	Ecm2	3.56	4.38	0.4	1.79	0	0	0	5.85	-3.863	0.0172291
ENSMUSG00000032514	Ttc21a	1.62	1.1	1.6	2.87	0	0	1.66	0	-3.862	0.0131135
ENSMUSG00000038132	Rbm24	4.2	0.37	2.81	1.43	0	2.57	0	0	-3.855	0.0222299
ENSMUSG00000073771	Btbd19	3.23	1.1	1.6	1.07	0	0.37	0	0	-3.739	0.0114821
ENSMUSG00000112805	AC153504.2	1.62	2.92	0.4	2.51	0	0	0	1.1	-3.685	0.0243706
ENSMUSG00000047515	BC049715	0.32	4.02	1.2	1.43	0	0	2.07	0	-3.682	0.0417938
ENSMUSG00000005686	Ampd3	1.62	1.83	2.4	0.36	1.26	0	0	0	-3.663	0.0317346
ENSMUSG00000034912	Mdga2	0.32	3.29	1.2	2.15	0	1.47	0	0	-3.558	0.0417939
ENSMUSG00000100593	1700119H24Rik	5.82	2.56	2.81	3.22	0	0	0.83	0.37	-3.543	0.000691055
ENSMUSG00000028527	Ak4	7.44	3.65	4.01	7.88	0	1.47	0	0.73	-3.525	4.84169e-05
ENSMUSG00000054072	Iigp1	1.29	1.1	2.4	1.79	0	2.2	0	0	-3.517	0.0264741
ENSMUSG00000033032	Afap1l1	2.59	0.37	1.6	1.07	1.67	0	0	0	-3.512	0.0461176
ENSMUSG00000039167	Adgrl4	1.94	1.1	2	1.07	0	0.73	0	0	-3.504	0.0243091
ENSMUSG00000103502	9330121J05Rik	1.94	1.1	1.2	1.79	0	0.73	0	0	-3.496	0.023764
ENSMUSG00000073658	Crygb	689.85	675.2	623.62	713.02	55.23	71.26	68.73	64.32	-3.467	3.71024e-295
ENSMUSG00000032890	Rims3	6.14	5.48	5.61	4.66	0.42	0.73	0.41	0.37	-3.458	2.91374e-06
ENSMUSG00000103711	Tstd1	0.65	1.1	2.4	2.15	0	1.84	0	0	-3.433	0.0404598
ENSMUSG00000020930	Ccdc103	3.88	5.48	1.6	2.15	0.84	0.37	0	0	-3.395	0.00283788
ENSMUSG00000033501	Crygs	350.42	301.8	301.79	309.21	25.11	32.69	37.68	32.16	-3.39	1.37771e-176
ENSMUSG00000067299	Crygd	249.88	201.68	214.82	227.52	25.94	21.3	29.81	14.25	-3.33	4.97674e-105
ENSMUSG00000058624	Gda	8.08	10.6	14.43	6.81	0	2.94	2.07	0	-3.287	1.27771e-06
ENSMUSG00000070870	Cryge	93.42	84.4	111.82	61.99	3.77	13.22	2.9	17.54	-3.272	6.18449e-22
ENSMUSG00000021013	Ttc8	33.94	51.88	57.71	41.56	6.28	1.84	5.8	5.48	-3.27	7.03504e-29
ENSMUSG00000032773	Chrm1	2.59	3.65	3.61	2.51	0	0.37	8.69	0	-3.266	0.00555153
ENSMUSG00000020227	Irak3	5.17	1.83	2.81	3.22	0	3.67	0.41	0	-3.24	0.00760727
ENSMUSG00000039997	Ifi203	4.53	2.19	2.81	1.79	0	0.37	0.83	0	-3.172	0.00555153
ENSMUSG00000020475	Pgam2	3.88	1.1	3.61	2.51	0	0	0.41	0.73	-3.152	0.00769515
ENSMUSG00000025952	Crygc	262.49	305.45	265.32	285.21	35.99	30.85	36.85	32.53	-3.129	5.14436e-171
ENSMUSG00000001027	Scn4a	6.14	6.58	3.61	1.43	0.84	0	2.48	0	-3.126	0.00506572
ENSMUSG00000049882	Vcpkmt	5.17	4.38	0.8	1.07	0	0	4.14	0.37	-3.097	0.0366538
ENSMUSG00000097789	Gm2115	1.29	3.29	2	3.58	1.26	0.37	0	0	-3.017	0.0166679
ENSMUSG00000020689	Itgb3	3.56	5.12	2.4	3.94	1.67	0.73	0	0	-2.985	0.00340485
ENSMUSG00000047986	Palm3	4.53	1.83	4.01	4.3	1.67	0.73	0	0	-2.939	0.00557992
ENSMUSG00000006546	Cryba2	145.15	160.4	163.12	150.84	26.78	17.26	18.22	24.85	-2.926	4.08586e-96
ENSMUSG00000092397	C130080G10Rik	7.44	4.02	5.61	6.45	1.26	0	1.24	0.73	-2.921	6.13279e-05
ENSMUSG00000051159	Cited1	3.56	4.38	4.01	2.87	0.84	0	0	1.1	-2.899	0.00211207
ENSMUSG00000024041	Cryaa	579.62	592.63	536.65	586.9	64.44	95.14	103.51	67.98	-2.89	2.2402e-123
ENSMUSG00000000724	Cryba1	526.28	595.92	613.6	632.76	95.4	72.73	88.19	89.9	-2.856	6.43372e-191
ENSMUSG00000110754	AC158620.1	1.94	1.46	1.6	6.09	0	0	0.41	2.56	-2.856	0.0442041
ENSMUSG00000027420	Bfsp1	34.91	47.86	34.87	48.37	9.21	6.61	2.9	5.85	-2.823	1.86431e-23
ENSMUSG00000032401	Lctl	2.59	3.29	7.21	2.15	0	4.78	0.83	0	-2.795	0.0202891
ENSMUSG00000026676	Ccdc3	5.5	7.31	6.81	7.88	0	0.37	1.66	2.92	-2.777	8.9681e-05
ENSMUSG00000039634	Zfp189	2.26	2.56	2.81	3.22	0.84	0	0.83	0	-2.717	0.0121574
ENSMUSG00000106139	Gm30648	1.29	1.46	1.2	1.79	0	0.37	0	0.37	-2.714	0.0456522
ENSMUSG00000109021	Gm44812	2.59	2.92	2.81	6.45	0.42	1.1	0	0.73	-2.669	0.0060467
ENSMUSG00000029343	Crybb1	54.96	86.96	78.95	91.72	25.52	10.28	16.98	7.67	-2.624	3.47707e-22
ENSMUSG00000030077	Chl1	5.17	2.19	1.2	4.3	0	4.04	0	0.73	-2.613	0.0420283
ENSMUSG00000005268	Prlr	7.44	9.87	3.61	7.17	0.42	4.78	1.24	0.73	-2.611	0.000491098
ENSMUSG00000029352	Crybb3	82.76	70.88	86.17	46.58	12.13	15.06	15.32	7.67	-2.608	2.05265e-27
ENSMUSG00000044948	Cfap43	2.59	1.46	5.21	2.87	4.18	0.73	0	0	-2.607	0.0404598
ENSMUSG00000097391	Mirg	2.26	5.85	4.01	2.51	1.26	0	1.24	0	-2.592	0.0138841
ENSMUSG00000114627	CT025566.1	15.84	15.71	21.24	26.16	21.34	2.94	3.73	1.83	-2.586	1.35342e-08
ENSMUSG00000060969	Irx1	5.5	3.29	2.4	3.94	0	0	4.55	1.1	-2.546	0.0217864
ENSMUSG00000056481	Cd248	5.5	6.94	8.42	12.18	1.26	0	1.66	4.02	-2.539	0.000250782
ENSMUSG00000049285	Mblac1	1.94	2.19	7.21	4.3	0	0	7.04	1.1	-2.525	0.0405334
ENSMUSG00000033356	Pus7l	2.59	4.02	3.21	2.15	0	0.73	0	2.92	-2.505	0.0319762
ENSMUSG00000085105	Gm12758	1.29	5.48	2	2.15	0	0	0.83	1.1	-2.468	0.0464867
ENSMUSG00000035296	Sgcg	11.31	25.94	22.84	13.97	2.93	7.71	4.14	1.46	-2.446	2.50426e-07
ENSMUSG00000066975	Cryba4	60.77	99.38	83.76	83.13	13.81	12.12	19.87	20.1	-2.404	8.0049e-32
ENSMUSG00000042787	Exog	6.79	7.67	8.02	5.73	6.28	1.1	1.24	0.73	-2.381	0.000322252
ENSMUSG00000005583	Mef2c	321.65	287.55	244.88	270.16	56.07	62.44	78.25	41.3	-2.322	1.03155e-56
ENSMUSG00000041658	Rragb	1.62	7.67	8.02	5.37	1.26	1.1	0.41	1.83	-2.317	0.004571
ENSMUSG00000050212	Eva1b	1.29	6.94	3.21	2.15	0	0.73	0.41	1.46	-2.314	0.0409476
ENSMUSG00000027533	Fabp5	29.74	32.15	34.47	36.19	24.27	9.92	4.14	3.29	-2.308	3.02687e-10
ENSMUSG00000085819	Ube4bos1	2.91	13.88	4.41	5.02	1.67	2.2	0.41	0.37	-2.301	0.0090039
ENSMUSG00000042240	Crybb2	154.2	128.61	110.22	117.16	22.18	31.22	28.57	28.87	-2.263	1.24711e-46
ENSMUSG00000031461	Myom2	37.5	34.71	35.27	27.95	1.26	4.41	10.76	12.79	-2.245	4.69147e-10
ENSMUSG00000052026	Slc6a7	11.31	7.67	7.21	4.66	0.84	2.94	0.41	2.56	-2.226	0.000600029
ENSMUSG00000085327	Gm16104	10.67	16.08	12.42	12.54	0.42	2.2	3.73	6.21	-2.182	8.71095e-06
ENSMUSG00000043398	Gpr135	3.56	6.58	2.4	3.22	0.84	4.04	0.83	0	-2.151	0.0412294
ENSMUSG00000112198	AC160028.2	11.31	16.08	17.63	9.32	7.53	4.78	0.83	1.83	-2.113	7.38842e-05
ENSMUSG00000027605	Acss2	5.5	6.58	8.42	7.17	2.09	0.37	4.97	1.46	-2.034	0.00250111
ENSMUSG00000021451	Sema4d	7.76	4.38	8.82	5.73	7.11	1.1	2.48	0	-1.995	0.0147276
ENSMUSG00000027401	Tgm3	24.89	16.08	20.44	21.14	5.44	6.61	5.38	5.12	-1.954	4.50878e-10
ENSMUSG00000015980	Lrrc27	12.61	10.6	10.82	8.24	2.09	3.31	5.38	1.46	-1.944	6.2304e-05
ENSMUSG00000045319	Proser2	17.78	11.33	9.62	9.32	5.86	1.84	4.14	2.19	-1.913	0.000113144
ENSMUSG00000029594	Rbm19	15.52	9.5	17.63	8.24	1.26	2.94	4.14	8.04	-1.904	0.000339766
ENSMUSG00000038135	Crygn	7.76	6.94	14.83	13.62	2.93	2.94	3.73	2.56	-1.898	9.87274e-05
ENSMUSG00000113940	AC159244.4	4.53	4.38	10.82	5.37	8.37	1.1	1.24	1.46	-1.869	0.019203
ENSMUSG00000054622	D730045B01Rik	5.82	4.02	4.01	7.52	7.53	1.47	1.66	0	-1.862	0.0385162
ENSMUSG00000025270	Alas2	46.55	34.34	43.69	35.83	7.11	14.69	22.36	8.77	-1.861	1.41671e-10
ENSMUSG00000046192	Iqub	7.11	1.46	4.81	6.81	1.26	1.84	1.66	1.1	-1.853	0.0225986
ENSMUSG00000075014	Gm10800	3.23	13.15	9.62	11.11	3.35	1.1	2.07	4.39	-1.848	0.0031394
ENSMUSG00000035504	Reep6	1967.4	1791.41	1784.7	2004.33	584.56	538.49	536.58	600.81	-1.829	2.23609e-149
ENSMUSG00000097254	C430042M11Rik	6.47	6.21	2.4	6.09	1.26	2.2	2.48	0.37	-1.821	0.0185544
ENSMUSG00000022844	Pdia5	9.7	25.94	26.85	18.27	4.18	11.39	7.87	2.92	-1.817	0.000120069
ENSMUSG00000051243	Islr2	6.79	13.15	11.22	13.26	1.67	4.04	7.04	2.19	-1.798	0.000575491
ENSMUSG00000045100	Slc25a26	6.14	6.58	5.61	11.11	2.51	1.47	16.98	1.1	-1.772	0.016512
ENSMUSG00000060260	Pwwp2b	21.34	12.06	10.82	15.05	3.77	4.41	2.9	14.25	-1.768	0.000287495
ENSMUSG00000056771	Gm10010	4.53	3.65	4.01	7.52	2.93	1.47	1.66	0	-1.759	0.0372264
ENSMUSG00000073421	H2-Ab1	23.28	24.11	24.85	32.61	10.88	7.35	10.35	5.48	-1.717	4.04667e-09
ENSMUSG00000011752	Pgam1	55.28	36.17	30.86	31.89	10.46	16.16	6.62	13.52	-1.703	1.14188e-08
ENSMUSG00000058402	Zfp420	10.99	5.85	7.21	11.82	2.93	1.1	4.14	3.65	-1.692	0.00217716
ENSMUSG00000103108	Rncr4	95.36	103.77	90.58	72.73	24.69	37.1	29.4	28.51	-1.69	2.67319e-23
ENSMUSG00000025380	Fscn2	67.89	65.77	90.18	66.64	26.78	17.63	47.2	20.83	-1.689	6.34465e-14
ENSMUSG00000030871	Ears2	6.79	5.85	3.61	6.45	2.09	4.78	0.83	1.1	-1.68	0.0243256
ENSMUSG00000054404	Slfn5	4.53	8.4	7.21	6.81	2.93	6.98	0.83	1.1	-1.677	0.0213338
ENSMUSG00000032556	Bfsp2	22.95	28.86	16.03	14.69	3.35	6.61	8.28	9.14	-1.662	9.15476e-06
ENSMUSG00000030324	Rho	18201.5	17192.2	18003.7	18134.3	5927.61	6166.16	5780.21	6292.46	-1.655	2.76792e-204
ENSMUSG00000029864	Gstk1	3.88	5.85	8.02	15.77	0	2.2	2.9	5.85	-1.655	0.0461138
ENSMUSG00000030757	Zkscan2	9.7	7.67	4.81	5.02	2.09	6.24	2.48	0.37	-1.643	0.0300042
ENSMUSG00000041852	Tcf20	134.8	130.8	100.6	98.89	34.73	49.59	44.71	25.95	-1.635	2.717e-18
ENSMUSG00000041528	Rnf123	125.75	153.82	143.88	152.28	51.47	55.46	41.82	49.7	-1.621	1.27062e-37
ENSMUSG00000072437	Nanos1	7.76	7.31	5.21	12.9	2.93	0.37	3.73	4.02	-1.616	0.0110156
ENSMUSG00000084788	Gm11342	22.63	16.81	21.24	18.63	3.35	9.55	9.52	4.75	-1.612	6.72047e-06
ENSMUSG00000057093	Zfp607b	4.53	9.87	4.01	9.67	7.95	1.1	2.9	1.46	-1.607	0.0358838
ENSMUSG00000005124	Wisp1	39.76	44.58	50.9	56.97	14.65	13.96	16.56	23.02	-1.599	5.83542e-13
ENSMUSG00000050315	Synpo2	12.28	24.11	17.63	13.26	2.09	6.98	9.11	4.75	-1.598	0.000241795
ENSMUSG00000040632	Nrl	2104.14	2075.31	2078.48	2061.66	708	689.82	834.26	738.59	-1.595	1.86841e-138
ENSMUSG00000039533	Mmd2	30.71	19.73	22.04	18.27	7.11	5.51	9.94	9.5	-1.575	1.1324e-06
ENSMUSG00000038115	Ano2	26.83	37.63	56.91	42.28	12.55	20.57	10.35	14.98	-1.554	7.9531e-08
ENSMUSG00000055923	Aasdh	15.19	5.85	10.42	4.66	2.09	5.88	1.66	3.29	-1.552	0.0190389
ENSMUSG00000025389	Mip	127.69	126.05	146.69	125.76	55.65	44.45	38.09	51.9	-1.548	7.63054e-31
ENSMUSG00000031847	1700030J22Rik	17.78	8.04	16.83	10.39	6.7	3.67	4.97	4.02	-1.545	0.000590157
ENSMUSG00000033633	Clec18a	5.17	5.85	5.21	7.17	2.93	0.37	1.24	5.85	-1.542	0.049086
ENSMUSG00000028766	Alpl	102.48	158.57	143.08	121.11	45.61	54.73	40.16	51.16	-1.541	2.11359e-23
ENSMUSG00000032087	Dscaml1	65.3	98.28	70.14	82.41	26.78	37.83	26.91	25.22	-1.54	5.0802e-16
ENSMUSG00000033233	Trim45	6.14	4.38	3.21	5.37	0.42	2.2	2.07	2.19	-1.532	0.0393095
ENSMUSG00000062859	Tcp11	24.57	14.98	20.84	8.96	12.13	6.61	2.07	6.21	-1.526	0.00265041
ENSMUSG00000060019	Gm10073	20.37	14.98	24.05	16.12	8.79	6.61	6.62	5.85	-1.524	3.54572e-06
ENSMUSG00000099696	2900052N01Rik	22.63	24.48	19.24	22.21	4.6	20.2	11.18	5.12	-1.523	9.94833e-05
ENSMUSG00000032294	Pkm	1102.66	1042.77	1007.98	1064.87	412.58	371.73	395.39	388.85	-1.517	1.36636e-121
ENSMUSG00000086421	Gm14091	19.4	12.79	8.42	10.39	4.18	4.41	2.48	13.16	-1.515	0.00530509
ENSMUSG00000036242	3632451O06Rik	31.36	29.96	26.45	25.8	7.11	13.59	6.21	16.08	-1.508	9.33873e-07
ENSMUSG00000041046	Ramp3	45.26	47.5	34.87	35.11	16.74	15.79	16.15	12.43	-1.505	1.46617e-11
ENSMUSG00000050447	Lypd6	5.17	10.23	5.61	9.67	5.44	4.04	1.66	0.73	-1.5	0.0298095
ENSMUSG00000042763	Maneal	6.79	10.6	5.61	8.6	4.18	2.94	3.31	1.46	-1.496	0.00685617
ENSMUSG00000038515	Grtp1	117.02	107.78	107.01	102.12	42.26	34.9	48.86	39.1	-1.488	2.04698e-27
ENSMUSG00000030513	Pcsk6	6.14	6.94	7.21	6.09	5.86	0.73	1.24	3.65	-1.478	0.035211
ENSMUSG00000034837	Gnat1	8632.49	8049.48	8190.87	8503.9	3416.97	3072.98	3158.6	3152.81	-1.473	4.52917e-131
ENSMUSG00000056288	Gm11961	4.53	12.79	12.42	13.97	6.28	2.57	2.9	5.12	-1.473	0.0059894
ENSMUSG00000094690	1600014C23Rik	6.79	9.13	8.82	5.02	11.3	1.1	2.9	2.56	-1.472	0.0323874
ENSMUSG00000049823	Zbtb12	17.13	5.85	10.42	10.03	1.67	4.41	4.97	5.12	-1.462	0.00695523
ENSMUSG00000030351	Tspan11	16.81	15.71	15.23	12.9	6.28	7.71	5.38	4.02	-1.457	3.61048e-05
ENSMUSG00000029672	Fam3c	399.88	396.79	492.57	484.42	193.32	176.31	164.37	154.95	-1.452	2.12964e-44
ENSMUSG00000029491	Pde6b	2510.81	2850.26	2728.55	2672.56	1096.31	1021.51	1060.73	1057.64	-1.433	5.70127e-140
ENSMUSG00000040562	Gstm2	15.19	11.33	10.82	10.39	1.67	9.92	5.38	4.02	-1.433	0.00420585
ENSMUSG00000021384	Susd3	75.64	96.09	90.58	94.23	39.33	32.69	36.85	31.79	-1.431	6.0103e-22
ENSMUSG00000014164	Klhl3	34.91	32.52	40.48	41.92	17.57	18.37	9.94	13.16	-1.421	3.5661e-09
ENSMUSG00000024030	Abcg1	8.08	19.36	13.23	18.27	10.46	2.57	9.11	2.56	-1.416	0.0122926
ENSMUSG00000036913	Trim67	9.37	7.67	21.24	8.96	5.86	3.31	6.62	0.73	-1.406	0.0263404
ENSMUSG00000030008	Pradc1	15.19	14.98	12.83	13.62	1.67	11.02	2.48	8.77	-1.398	0.00800438
ENSMUSG00000069919	Hba-a1	1673.22	1487.79	1565.87	1604.11	634.77	636.93	667.82	623.47	-1.394	2.20981e-108
ENSMUSG00000004127	Trmt10a	15.19	8.4	18.84	17.92	6.7	2.57	5.38	16.81	-1.392	0.00835337
ENSMUSG00000042743	Sgtb	77.26	96.82	93.38	88.5	41.84	55.1	21.12	30.33	-1.389	4.53898e-11
ENSMUSG00000025386	Pde6g	5174.84	4592.71	4625.48	4939.17	1974.61	1890.95	1938.47	2034.87	-1.388	1.42889e-109
ENSMUSG00000031789	Cngb1	853.75	803.82	812.8	807.61	322.2	323.24	331.63	357.42	-1.386	2.22998e-101
ENSMUSG00000021255	Esrrb	257.97	252.47	284.56	293.45	105.03	106.52	113.44	118.04	-1.385	4.88519e-50
ENSMUSG00000047139	Cd24a	17.78	20.46	19.64	18.27	8.79	10.28	7.04	4.75	-1.385	1.38942e-05
ENSMUSG00000046110	Serinc4	14.22	12.42	14.43	11.11	6.7	1.47	14.08	4.02	-1.384	0.00886041
ENSMUSG00000021694	Ercc8	5.17	7.31	7.61	7.52	1.67	1.47	4.97	3.29	-1.384	0.022673
ENSMUSG00000113252	AC098839.1	9.7	24.85	18.04	8.96	7.11	6.98	5.8	3.65	-1.377	0.00402379
ENSMUSG00000032463	Faim	106.03	109.61	106.21	128.27	43.94	38.2	48.03	55.18	-1.369	3.57616e-22
ENSMUSG00000030865	Chp2	11.31	5.12	7.21	5.73	1.67	1.84	3.31	6.58	-1.369	0.0415015
ENSMUSG00000017344	Vtn	323.59	440.64	453.29	403.8	155.24	183.29	170.99	171.4	-1.368	1.20888e-42
ENSMUSG00000022332	Khdrbs3	69.83	67.23	60.92	87.07	25.52	34.16	29.81	27.04	-1.365	1.94762e-14
ENSMUSG00000037805	Rpl10a	24.57	34.71	51.3	39.05	8.37	11.39	34.36	19.73	-1.352	0.00031493
ENSMUSG00000037885	Stk35	149.03	160.76	155.1	150.13	69.46	65.02	61.28	60.67	-1.351	2.37986e-36
ENSMUSG00000033578	Tmem35a	60.77	46.4	46.49	54.46	20.09	28.65	22.77	16.45	-1.351	3.45895e-10
ENSMUSG00000021123	Rdh12	361.73	323.72	341.07	341.46	132.23	143.62	134.14	162.99	-1.344	5.83335e-50
ENSMUSG00000006575	Rundc3a	27.8	36.17	54.51	49.45	29.29	10.28	14.49	20.83	-1.344	4.38344e-05
ENSMUSG00000025584	Pde8a	13.58	12.42	10.42	19.35	3.77	5.51	7.45	6.58	-1.344	0.000830368
ENSMUSG00000052305	Hbb-bs	2110.28	2025.25	2150.62	2032.28	876.63	892.58	881.87	835.44	-1.343	7.08828e-126
ENSMUSG00000078963	Hsbp1l1	48.49	57.36	40.88	69.15	20.5	24.61	12.42	29.6	-1.334	1.61068e-07
ENSMUSG00000024575	Pde6a	2734.18	2776.45	2611.93	2718.07	1106.77	1131.71	1175.42	1177.87	-1.329	1.79129e-139
ENSMUSG00000069917	Hba-a2	1190.59	1098.67	1061.28	1115.39	533.09	497.72	453.36	402.37	-1.319	1.41347e-53
ENSMUSG00000029638	Glcci1	18.43	25.94	23.65	25.8	6.7	19.84	11.18	8.04	-1.319	0.000108418
ENSMUSG00000000628	Hk2	566.36	511.15	540.26	547.84	223.03	249.78	237.24	213.79	-1.318	3.91823e-61
ENSMUSG00000057541	Pus7	7.76	10.23	8.02	9.67	6.7	1.1	2.9	4.75	-1.317	0.0194321
ENSMUSG00000026712	Mrc1	14.22	10.6	7.61	11.47	6.28	3.31	5.38	4.02	-1.31	0.00342243
ENSMUSG00000023979	Guca1b	833.38	863.01	906.58	897.54	356.51	371.36	380.49	399.08	-1.304	1.06372e-98
ENSMUSG00000028496	Mllt3	45.26	32.15	40.48	42.28	21.34	13.22	14.08	20.47	-1.303	3.49191e-08
ENSMUSG00000030283	St8sia1	32.97	23.02	29.26	36.9	10.04	9.92	18.22	14.98	-1.298	5.19956e-06
ENSMUSG00000071648	Rom1	2584.19	2103.8	2229.58	2478.72	1062	979.27	985.79	1053.98	-1.292	8.61659e-64
ENSMUSG00000056014	A430033K04Rik	9.7	14.61	12.02	8.6	9.62	3.67	6.21	2.19	-1.284	0.0137706
ENSMUSG00000029064	Gnb1	4869.68	4863.08	4839.1	4944.54	2096.8	2102.16	2160.8	2223.08	-1.274	3.02407e-152
ENSMUSG00000056043	Rgs9bp	572.5	613.46	600.78	634.91	298.35	268.88	244.69	262.4	-1.27	1.9193e-58
ENSMUSG00000019845	Tube1	12.61	14.61	16.43	6.45	8.79	4.78	4.55	4.39	-1.269	0.00762095
ENSMUSG00000113262	Dohh	80.82	81.48	84.97	84.92	34.73	23.51	43.89	39.47	-1.268	1.52885e-14
ENSMUSG00000023978	Prph2	2133.56	2525.44	2630.76	2459.73	1076.22	1090.57	1089.3	1093.82	-1.267	6.06543e-91
ENSMUSG00000062012	Zfp13	7.76	8.04	5.21	10.03	4.18	4.04	2.9	2.56	-1.266	0.0169476
ENSMUSG00000058966	Fam57b	770.99	815.87	706.19	654.61	312.16	314.79	332.05	350.47	-1.263	1.18607e-55
ENSMUSG00000003500	Impdh1	667.87	650.36	718.21	655.33	265.29	341.97	310.11	291.27	-1.26	4.92414e-54
ENSMUSG00000004698	Hdac9	21.66	20.46	24.85	28.31	7.95	13.22	8.69	12.06	-1.259	1.04864e-05
ENSMUSG00000070570	Slc17a7	829.18	733.3	764.7	856.34	350.23	327.28	363.93	377.15	-1.257	3.39646e-60
ENSMUSG00000028893	Sesn2	10.02	10.23	7.61	6.09	4.18	1.84	2.9	6.94	-1.253	0.0281482
ENSMUSG00000021913	Ogdhl	30.06	24.11	22.04	31.17	8.79	16.9	11.18	11.69	-1.252	1.31478e-05
ENSMUSG00000020435	Osbp2	2698.95	2226.57	2131.78	2273.42	779.97	1082.85	1085.16	1025.11	-1.25	2.45657e-39
ENSMUSG00000034829	Nxnl1	457.74	398.25	448.48	412.76	207.96	170.44	200.8	190.04	-1.249	4.06703e-44
ENSMUSG00000051166	Eml5	64.65	48.23	36.07	48.73	15.48	25.34	32.71	17.91	-1.243	4.8208e-06
ENSMUSG00000060981	Hist1h4h	22.31	15.71	16.83	21.86	9.21	7.35	6.62	11.33	-1.239	0.000135243
ENSMUSG00000021221	Dpf3	108.62	126.05	126.25	120.03	48.12	50.69	53.82	63.96	-1.236	8.42144e-23
ENSMUSG00000031293	Rs1	1070.98	1067.98	1102.56	1106.79	488.74	498.45	494.76	484.96	-1.233	5.10996e-111
ENSMUSG00000060586	H2-Eb1	27.15	24.48	26.05	26.51	9.21	11.39	13.66	12.79	-1.233	6.01149e-07
ENSMUSG00000087385	Frg2f1	12.28	8.77	5.61	5.37	3.77	3.31	2.9	4.39	-1.23	0.0301019
ENSMUSG00000020848	Doc2b	79.52	85.5	79.36	84.56	37.24	40.77	37.68	33.62	-1.228	1.11497e-18
ENSMUSG00000052151	Plpp2	146.12	153.09	157.91	147.98	68.21	80.08	69.14	45.68	-1.222	6.55177e-20
ENSMUSG00000004655	Aqp1	44.29	86.23	66.93	70.23	33.89	29.02	31.47	30.7	-1.217	9.69089e-10
ENSMUSG00000071654	Uqcc3	154.2	131.9	145.08	132.57	59	54	68.73	81.5	-1.215	2.55626e-19
ENSMUSG00000047034	Ankrd33	161.63	139.94	127.05	146.54	61.51	63.91	60.86	80.77	-1.208	4.06578e-20
ENSMUSG00000024227	Pdzph1	108.62	106.69	107.01	79.9	50.21	38.2	56.31	42.03	-1.206	7.15137e-14
ENSMUSG00000052698	Tln2	233.4	214.47	228.05	198.5	90.8	102.11	93.16	118.77	-1.205	6.79744e-29
ENSMUSG00000026610	Esrrg	13.25	13.88	12.42	16.48	5.02	17.63	5.8	5.48	-1.199	0.00650295
ENSMUSG00000024610	Cd74	24.57	24.11	24.85	30.81	10.46	8.45	23.6	13.16	-1.191	0.000145419
ENSMUSG00000029055	Plch2	125.75	133.73	102.6	133.29	64.86	44.81	64.59	56.65	-1.186	7.02984e-16
ENSMUSG00000057315	Arhgap24	51.08	28.13	39.28	28.66	22.18	15.79	9.94	17.91	-1.183	0.00010817
ENSMUSG00000034786	Gpsm3	28.45	35.44	34.47	29.38	13.39	9.18	16.98	19.37	-1.178	6.28142e-06
ENSMUSG00000040009	Gnaz	140.3	148.71	133.46	122.54	52.3	67.59	66.24	69.44	-1.177	1.9623e-21
ENSMUSG00000052533	Nup188	22.95	15.71	17.23	16.48	7.53	6.24	14.49	8.41	-1.17	0.00126906
ENSMUSG00000097050	Gm9918	29.74	20.46	27.65	31.53	7.95	17.26	11.59	14.62	-1.165	9.8923e-05
ENSMUSG00000047298	Kcnv2	171.65	165.88	177.95	154.07	90.38	93.67	53.82	68.71	-1.163	1.16898e-15
ENSMUSG00000031974	Abcb10	13.9	21.19	24.05	28.31	12.55	4.78	12.42	10.6	-1.161	0.00188977
ENSMUSG00000031450	Grk1	708.28	711.74	742.26	757.09	333.5	359.97	335.36	359.25	-1.16	1.07557e-71
ENSMUSG00000026737	Pip4k2a	26.83	20.1	17.63	14.33	10.04	8.82	8.28	9.87	-1.16	0.000475079
ENSMUSG00000050786	Ccdc126	58.51	70.15	68.13	88.14	37.24	29.75	35.19	31.43	-1.158	6.73387e-11
ENSMUSG00000049606	Zfp644	604.51	547.33	589.56	547.84	270.73	281.73	291.89	246.68	-1.157	1.89166e-47
ENSMUSG00000049630	C1ql3	7.76	17.17	10.02	14.33	4.6	5.14	9.52	4.75	-1.155	0.0156409
ENSMUSG00000038058	Nod1	9.05	14.25	5.21	12.54	4.18	5.51	6.62	3.29	-1.154	0.0274674
ENSMUSG00000090071	Cdk5r2	309.69	244.07	258.51	264.78	120.51	140.32	125.86	120.97	-1.153	2.26898e-28
ENSMUSG00000008932	Slc1a7	10.99	21.19	20.04	26.16	3.77	11.75	7.04	13.52	-1.153	0.00932108
ENSMUSG00000039252	Lgi2	7.44	10.23	4.41	6.45	2.09	3.31	4.14	4.02	-1.152	0.0493516
ENSMUSG00000038264	Sema7a	16.16	16.44	19.24	15.05	12.55	6.61	9.52	4.39	-1.151	0.00257943
ENSMUSG00000021265	Slc25a29	14.55	15.35	8.02	8.24	3.77	3.31	7.87	7.31	-1.144	0.0226004
ENSMUSG00000058743	Kcnj14	135.13	165.51	167.93	170.55	79.92	76.03	74.11	77.84	-1.143	5.54137e-24
ENSMUSG00000096351	Samd11	306.13	272.2	248.49	237.91	135.57	119.75	146.98	90.63	-1.143	4.05978e-18
ENSMUSG00000037788	Vopp1	288.68	306.91	318.63	284.85	133.06	149.5	156.09	140.7	-1.137	8.9096e-40
ENSMUSG00000027634	Ndrg3	188.46	187.8	157.91	184.17	83.69	79.71	96.05	90.27	-1.13	1.22001e-24
ENSMUSG00000037747	Phyhipl	16.16	14.98	16.43	8.6	3.35	13.59	7.45	6.21	-1.12	0.0208778
ENSMUSG00000042462	Dctpp1	29.74	24.11	29.26	35.47	7.53	13.59	15.32	19.73	-1.117	0.000144521
ENSMUSG00000022831	Hcls1	35.56	39.83	46.49	36.19	24.27	22.04	14.49	16.45	-1.116	1.37511e-06
ENSMUSG00000073940	Hbb-bt	438.35	401.18	429.24	439.99	208.38	220.02	205.36	206.12	-1.114	2.20529e-46
ENSMUSG00000061288	Taok3	399.23	353.68	373.93	358.66	175.74	167.5	180.52	230.24	-1.111	1.18636e-29
ENSMUSG00000027530	Fabp12	203.33	159.3	185.56	169.83	80.34	85.58	83.63	106.71	-1.109	2.84516e-19
ENSMUSG00000035443	Thyn1	8.08	11.69	10.42	11.47	2.51	9.18	3.73	6.21	-1.102	0.0308014
ENSMUSG00000037446	Tulp1	1289.83	1168.46	1053.67	1106.43	611.34	574.85	551.07	531.74	-1.096	1.07387e-44
ENSMUSG00000050132	Sarm1	22.31	21.19	28.46	17.92	7.95	12.86	11.18	12.43	-1.093	0.000228026
ENSMUSG00000074259	Gramd2	9.7	10.96	14.43	12.9	6.7	4.04	5.38	7.67	-1.091	0.00765136
ENSMUSG00000063681	Crb1	67.56	83.3	87.77	91.01	53.14	32.32	37.68	44.95	-1.089	7.10031e-10
ENSMUSG00000024170	Telo2	11.96	8.77	10.42	10.75	4.6	4.41	3.73	14.62	-1.089	0.0358911
ENSMUSG00000010492	Uckl1os	52.37	40.19	49.3	57.69	25.52	26.45	25.67	22.29	-1.088	2.94643e-08
ENSMUSG00000032192	Gnb5	277.04	329.2	329.05	314.23	161.94	156.84	128.35	169.21	-1.086	4.11334e-28
ENSMUSG00000026825	Dnm1	47.2	56.63	31.66	35.47	23.01	16.16	24.84	21.2	-1.08	2.27212e-05
ENSMUSG00000063849	Ppcdc	15.84	19.73	19.64	11.82	1.67	9.92	10.76	8.41	-1.08	0.0128824
ENSMUSG00000020890	Gucy2e	352.04	321.89	351.09	335.37	178.67	171.17	178.86	157.51	-1.077	9.86612e-37
ENSMUSG00000006678	Pola1	57.22	52.61	54.11	61.99	26.36	31.96	34.36	14.25	-1.074	8.88789e-07
ENSMUSG00000042282	Gucy2f	55.28	44.58	19.64	26.16	20.5	18.37	19.46	13.16	-1.071	0.00235071
ENSMUSG00000060063	Alox5ap	20.69	17.17	25.25	20.78	8.37	10.28	12.42	11.33	-1.067	0.000252707
ENSMUSG00000019850	Tnfaip3	21.98	38.36	38.48	34.4	23.01	13.22	20.7	9.14	-1.066	0.00121084
ENSMUSG00000033208	S100b	28.45	20.83	26.05	22.93	10.04	14.33	16.15	9.5	-1.064	0.000236362
ENSMUSG00000002957	Ap2a2	288.35	230.55	261.71	226.8	138.08	109.83	142.42	119.87	-1.061	6.20973e-20
ENSMUSG00000072915	Gm12258	16.81	13.15	19.64	9.67	5.02	11.75	4.14	9.5	-1.061	0.0225101
ENSMUSG00000022836	Mylk	414.75	306.55	307.8	316.74	173.65	175.21	149.46	160.8	-1.057	6.63469e-23
ENSMUSG00000026609	Ush2a	12.28	9.5	14.43	12.9	6.28	8.08	7.04	3.65	-1.055	0.0119098
ENSMUSG00000006007	Pdc	3873.05	4427.93	4446.73	4375.92	2219.82	2202.07	2091.66	2275.34	-1.053	1.1932e-70
ENSMUSG00000002058	Unc119	2538.28	2400.48	2320.15	2338.98	1064.09	1240.8	1297.14	1280.93	-1.051	1.03573e-52
ENSMUSG00000023982	Guca1a	523.69	566.32	543.07	437.84	242.69	260.43	332.05	269.34	-1.048	1.65183e-25
ENSMUSG00000031790	Mmp15	10.34	11.69	12.42	12.18	7.53	5.51	2.9	7.67	-1.047	0.0142795
ENSMUSG00000067220	Cnga1	651.06	738.41	703.38	791.84	386.22	335.73	390.01	371.67	-1.045	1.06017e-39
ENSMUSG00000040037	Negr1	26.83	26.31	30.06	28.31	13.81	12.12	16.15	15.35	-1.045	9.7812e-06
ENSMUSG00000050556	Kcnb1	1417.52	1546.61	1615.17	1572.58	745.24	781.65	872.77	785.37	-1.042	3.85071e-58
ENSMUSG00000030554	Synm	41.05	29.6	23.25	37.98	8.37	18.37	18.22	20.83	-1.039	0.000809962
ENSMUSG00000037318	Traf3ip3	32.97	28.86	27.65	20.06	15.48	11.75	16.98	12.79	-1.037	0.000184852
ENSMUSG00000039323	Igfbp2	19.72	20.1	25.25	24.01	5.86	13.96	24.43	9.14	-1.033	0.00754538
ENSMUSG00000037386	Rims2	305.49	294.12	280.15	265.86	122.18	160.52	154.02	152.76	-1.032	1.07133e-25
ENSMUSG00000021730	Hcn1	418.63	402.64	396.38	407.75	221.35	197.98	187.97	253.26	-1.029	3.41424e-28
ENSMUSG00000029330	Cds1	183.94	222.15	216.83	200.65	108.38	124.52	88.19	106.71	-1.024	6.62271e-19
ENSMUSG00000033618	Map3k13	25.21	25.94	29.26	26.16	14.65	10.28	17.39	13.52	-1.024	6.5737e-05
ENSMUSG00000024842	Cabp4	156.78	132.26	141.88	124.33	65.69	74.57	84.05	66.88	-1.022	1.58436e-15
ENSMUSG00000039231	Suv39h1	20.69	19	23.25	21.14	19.25	6.98	14.08	8.04	-1.02	0.00503708
ENSMUSG00000059851	Kmt5c	14.55	19.73	23.25	15.77	9.21	8.08	9.52	11.33	-1.019	0.00168468
ENSMUSG00000017692	Rhbdl3	11.96	13.88	6.41	14.33	7.11	7.35	5.38	4.75	-1.019	0.0262228
ENSMUSG00000032249	Anp32a	329.73	267.82	252.5	253.32	125.95	140.32	193.76	137.05	-1.016	7.27418e-16
ENSMUSG00000025477	Inpp5a	24.24	24.11	19.64	31.53	14.65	11.02	8.28	27.04	-1.015	0.00526932
ENSMUSG00000054057	A930004D18Rik	10.99	15.35	20.84	16.12	8.37	5.51	8.28	10.96	-1.012	0.00869264
ENSMUSG00000032381	Fam96a	25.54	28.13	33.67	33.32	13.81	15.43	34.36	13.16	-1.011	0.000721409
ENSMUSG00000049932	H2afx	22.63	30.69	24.85	32.61	16.74	13.59	12.01	16.08	-1.008	0.000126753
ENSMUSG00000024019	Cmtr1	57.86	29.96	37.27	44.43	19.67	16.9	21.53	28.87	-1.005	0.000255323
ENSMUSG00000047766	Lrrc49	26.83	16.08	27.25	22.57	18.41	8.45	14.49	9.5	-1.005	0.00444908
ENSMUSG00000015653	Steap2	52.37	41.65	49.7	55.54	20.09	25.34	30.22	29.97	-1.004	5.87951e-07
ENSMUSG00000025900	Rp1	927.77	871.41	838.45	881.06	403.38	516.45	447.98	494.47	-1.002	1.15617e-36
ENSMUSG00000020182	Ddc	51.4	44.21	46.89	49.8	20.09	23.51	28.98	29.6	-1.001	2.1469e-07
ENSMUSG00000035285	Nat14	58.51	36.17	49.3	47.65	20.92	22.41	38.5	25.95	-1	4.84496e-05
ENSMUSG00000041044	Lrit1	101.51	123.86	119.43	125.76	51.89	64.65	58.79	78.21	-0.996	2.13984e-12
ENSMUSG00000028931	Kcnab2	88.25	73.8	62.52	74.53	41.01	41.14	29.81	46.41	-0.996	3.39259e-08
ENSMUSG00000030402	Ppm1n	27.48	20.83	33.27	33.32	15.06	13.22	15.73	17.18	-0.995	0.000189147
ENSMUSG00000038963	Slco4a1	38.47	27.77	36.47	43.71	16.32	15.79	20.29	26.68	-0.994	0.000119366
ENSMUSG00000078588	Ccdc24	51.72	30.33	24.85	33.32	20.09	14.33	17.8	17.54	-0.994	0.000523942
ENSMUSG00000039768	Dnajc11	21.01	25.21	19.64	20.06	8.79	9.92	11.18	22.29	-0.993	0.00323745
ENSMUSG00000090066	1110002E22Rik	10.34	9.5	18.84	14.69	7.11	6.61	3.73	12.06	-0.991	0.0423678
ENSMUSG00000030189	Ybx3	1273.67	1168.82	1096.55	1065.23	632.26	643.54	574.25	591.31	-0.989	1.75537e-40
ENSMUSG00000062961	Ccdc177	142.24	108.88	106.21	90.65	49.38	50.32	61.69	70.53	-0.989	4.15268e-09
ENSMUSG00000107023	Gm42715	16.49	11.33	11.62	18.27	4.6	7.71	12.83	7.31	-0.987	0.0234226
ENSMUSG00000048249	Crebrf	485.87	407.02	375.54	399.5	204.62	256.02	207.43	219.28	-0.986	1.94343e-21
ENSMUSG00000041460	Cacna2d4	115.73	103.03	114.62	108.56	61.93	58.04	59.62	58.11	-0.985	1.54402e-16
ENSMUSG00000022419	Deptor	49.14	33.25	38.07	30.1	27.2	15.06	21.12	17.91	-0.985	0.00028165
ENSMUSG00000035615	Frmpd1	67.89	75.27	62.52	65.57	39.33	36	37.26	33.62	-0.982	1.63433e-10
ENSMUSG00000007050	Lsm2	15.52	12.79	14.43	9.67	6.28	8.45	3.73	9.5	-0.981	0.0224121
ENSMUSG00000018678	Sp2	29.42	29.23	28.46	26.51	15.48	14.33	10.76	27.77	-0.978	0.000829619
ENSMUSG00000092349	Platr17	541.15	559.38	506.99	508.79	252.74	287.98	294.79	307.35	-0.977	6.74118e-36
ENSMUSG00000020886	Dlg4	267.34	291.2	222.04	267.29	130.97	129.66	146.57	166.28	-0.977	3.82092e-19
ENSMUSG00000028101	Pias3	125.75	119.84	111.82	117.16	63.6	69.06	60.45	63.59	-0.976	1.28359e-16
ENSMUSG00000057914	Cacnb2	73.38	55.17	66.13	44.07	26.78	35.63	45.13	25.58	-0.975	4.49125e-05
ENSMUSG00000027459	Fam110a	10.99	25.94	27.65	22.93	11.72	12.86	7.87	16.08	-0.975	0.00911461
ENSMUSG00000046049	Rp1l1	292.56	308.74	286.96	298.82	162.77	156.48	163.54	160.44	-0.974	6.71403e-34
ENSMUSG00000059834	Sclt1	28.77	30.33	34.07	24.72	15.06	15.79	29.4	11.69	-0.974	0.00102215
ENSMUSG00000070372	Capza1	16.49	17.54	21.64	6.45	9.62	4.78	9.94	10.6	-0.974	0.0370234
ENSMUSG00000031527	Eri1	22.63	16.08	19.24	18.99	4.18	12.12	16.56	8.77	-0.973	0.0145695
ENSMUSG00000069049	Eif2s3y	9.7	13.15	14.03	13.62	4.18	4.41	9.52	9.14	-0.971	0.0287228
ENSMUSG00000021733	Slc4a7	188.79	214.84	214.42	188.82	113.82	114.24	95.64	114.02	-0.968	3.13061e-21
ENSMUSG00000023988	Bysl	31.03	39.09	25.65	42.64	15.48	16.9	23.6	19.37	-0.968	0.000200011
ENSMUSG00000021671	Poc5	22.31	33.25	23.25	28.31	14.23	12.49	15.73	15.71	-0.968	0.000255218
ENSMUSG00000030956	Fam53b	99.89	79.65	82.16	72.02	61.09	36	52.17	38.74	-0.966	6.79696e-07
ENSMUSG00000040543	Pitpnm3	37.18	60.29	68.13	65.57	19.25	36.73	33.12	35.81	-0.966	5.91817e-05
ENSMUSG00000032262	Elovl4	427.68	438.08	399.18	397.36	166.96	236.92	244.69	229.51	-0.961	7.11657e-23
ENSMUSG00000021009	Ptpn21	90.51	80.02	77.35	61.99	38.5	40.04	44.71	46.78	-0.96	6.00687e-09
ENSMUSG00000043773	1700048O20Rik	14.55	9.13	12.02	8.6	5.02	7.71	7.45	4.02	-0.96	0.038144
ENSMUSG00000021115	Vrk1	21.34	18.27	17.23	19.35	8.37	16.9	7.87	10.96	-0.959	0.00526518
ENSMUSG00000024218	Taf11	11.96	19.36	18.44	12.54	16.74	7.35	8.28	6.21	-0.959	0.0264643
ENSMUSG00000087141	Plcxd2	82.43	58.09	57.31	60.91	41.84	27.92	47.2	24.85	-0.958	6.60844e-05
ENSMUSG00000025860	Xiap	449.34	507.87	531.84	422.79	348.98	257.86	266.22	224.39	-0.954	1.05309e-16
ENSMUSG00000023707	Ogfod2	24.24	31.06	34.87	25.08	12.13	13.59	17.8	19.37	-0.954	0.000352717
ENSMUSG00000021928	Ebpl	265.72	245.53	229.65	242.93	146.45	130.03	120.9	143.63	-0.953	3.75846e-22
ENSMUSG00000085794	Vax2os	62.71	59.92	70.54	79.9	30.13	36	50.1	37.64	-0.953	3.70126e-07
ENSMUSG00000075410	Prcd	287.38	260.87	211.21	246.87	125.95	147.29	134.97	148.74	-0.952	5.38289e-18
ENSMUSG00000090035	Galnt4	46.55	48.23	55.31	49.09	37.66	25.34	25.26	25.58	-0.947	1.53481e-06
ENSMUSG00000071379	Hpcal1	50.11	50.06	54.11	46.22	24.27	28.65	22.36	41.66	-0.946	7.27815e-06
ENSMUSG00000070044	Fam149a	53.34	36.54	42.88	38.7	25.52	23.51	28.98	13.89	-0.945	0.00023645
ENSMUSG00000000934	Top1mt	17.46	11.33	14.83	16.12	6.7	9.18	8.69	8.41	-0.944	0.00799599
ENSMUSG00000042726	Trafd1	114.76	145.42	189.57	135.08	63.6	81.91	71.63	93.19	-0.942	2.62776e-09
ENSMUSG00000033632	AW554918	27.48	22.29	22.44	21.14	11.72	13.59	12.83	13.52	-0.942	0.000372798
ENSMUSG00000048617	Rtbdn	320.36	294.85	311.81	345.4	178.67	162.72	193.35	172.13	-0.939	1.07249e-24
ENSMUSG00000032292	Nr2e3	739.31	720.51	713	766.4	419.28	395.6	398.29	423.93	-0.934	2.62658e-47
ENSMUSG00000040502	March9	37.18	23.38	37.27	25.08	15.9	12.86	24.84	16.81	-0.934	0.00213998
ENSMUSG00000020877	Scrn2	15.52	15.71	12.83	17.92	16.32	11.75	4.97	5.12	-0.934	0.0462168
ENSMUSG00000067367	Lyar	235.01	243.34	256.5	278.76	120.09	147.29	149.46	146.18	-0.933	4.50939e-21
ENSMUSG00000032060	Cryab	263.79	386.2	369.93	365.11	238.09	171.9	181.76	213.06	-0.931	7.68126e-14
ENSMUSG00000049969	Plekhf2	70.47	89.52	90.58	63.42	51.47	33.79	44.71	44.95	-0.931	2.8375e-07
ENSMUSG00000026933	Camsap1	221.76	177.57	227.25	226.45	128.88	118.64	103.92	131.57	-0.928	7.13534e-16
ENSMUSG00000041578	Crx	396.65	339.79	396.78	372.99	230.56	214.88	207.84	189.31	-0.927	4.4233e-23
ENSMUSG00000020907	Rcvrn	1774.08	1682.9	1631.2	1685.09	969.52	964.94	960.54	898.66	-0.926	4.4915e-52
ENSMUSG00000017493	Igfbp4	134.48	199.86	173.94	158.73	84.11	89.99	93.98	102.69	-0.926	6.02404e-13
ENSMUSG00000032743	D430042O09Rik	74.35	49.69	88.57	52.67	28.45	35.26	43.06	37.64	-0.926	4.78373e-05
ENSMUSG00000038510	Rpf2	16.49	12.79	18.44	24.01	9.62	15.06	10.35	3.29	-0.926	0.0425826
ENSMUSG00000019978	Epb41l2	701.16	992.71	1032.43	925.49	580.37	512.04	505.94	515.66	-0.925	1.57313e-24
ENSMUSG00000024518	Rax	77.58	82.21	77.35	85.99	45.61	41.87	45.13	48.61	-0.923	1.38078e-11
ENSMUSG00000020241	Col6a2	14.87	24.85	20.44	24.72	24.27	11.39	9.11	10.6	-0.923	0.0142263
ENSMUSG00000046991	Wdr27	19.4	23.75	16.43	23.65	5.44	22.04	13.66	9.87	-0.919	0.0249179
ENSMUSG00000087590	Epb41l4aos	47.52	37.27	30.46	41.2	23.85	20.2	25.26	19.37	-0.917	8.9531e-05
ENSMUSG00000038520	Tbc1d17	35.88	40.19	42.08	47.65	17.57	22.77	35.61	23.02	-0.917	0.000133556
ENSMUSG00000021811	Dnajc9	40.08	50.06	48.09	43	23.85	26.45	39.33	19.37	-0.916	8.16773e-05
ENSMUSG00000075330	A930003A15Rik	131.25	139.21	144.68	144.75	100.84	73.1	72.04	80.4	-0.915	1.87891e-13
ENSMUSG00000061603	Akap6	50.75	38.36	32.86	33.32	25.11	20.57	24.01	16.45	-0.915	0.000303301
ENSMUSG00000037995	Igsf9	59.8	46.77	48.9	51.24	24.27	29.75	36.02	27.04	-0.913	3.05461e-06
ENSMUSG00000093639	Gm42419	35.56	40.19	34.87	49.09	17.57	11.02	27.33	34.72	-0.913	0.00423649
ENSMUSG00000054717	Hmgb2	53.99	65.04	62.92	36.9	48.12	23.14	36.43	25.95	-0.91	0.000727684
ENSMUSG00000035476	Tab3	15.52	23.75	17.63	14.33	4.6	9.18	10.76	18.64	-0.91	0.037792
ENSMUSG00000063229	Ldha	457.42	425.29	467.32	484.78	276.59	253.82	249.24	260.21	-0.909	1.55562e-30
ENSMUSG00000062444	Ap3b2	108.94	104.5	96.19	104.98	61.51	68.69	46.37	56.28	-0.908	2.26747e-10
ENSMUSG00000064326	Siva1	21.01	28.13	22.44	20.78	8.37	16.9	12.83	13.89	-0.907	0.00274794
ENSMUSG00000038070	Cntln	106.35	112.53	94.99	108.92	63.18	61.34	52.58	63.22	-0.904	1.94509e-12
ENSMUSG00000027674	Pex5l	141.59	157.47	159.51	129.7	98.75	82.65	67.9	85.15	-0.903	5.3229e-12
ENSMUSG00000053046	Brsk2	72.73	83.67	60.52	60.55	28.87	47.75	42.64	37.64	-0.901	3.52907e-06
ENSMUSG00000024277	Mapre2	116.38	121.67	127.45	130.78	83.69	67.95	66.24	67.61	-0.9	2.59519e-13
ENSMUSG00000024081	Cebpz	65.62	71.98	57.71	62.34	34.31	35.63	33.12	44.22	-0.894	8.29948e-08
ENSMUSG00000044724	Gpr152	18.1	15.71	23.65	28.31	12.55	10.65	15.32	10.6	-0.894	0.00711196
ENSMUSG00000038028	Tigar	24.24	26.31	33.67	30.81	12.55	36.73	16.15	14.98	-0.892	0.00564141
ENSMUSG00000079055	Slc8a3	8.08	14.61	19.64	21.5	7.95	11.75	8.28	9.14	-0.892	0.0356993
ENSMUSG00000028869	Gnl2	71.44	63.57	48.9	60.19	33.48	37.1	39.33	30.7	-0.89	1.81551e-06
ENSMUSG00000033075	Senp1	28.77	21.19	21.24	27.23	8.79	14.69	18.22	14.62	-0.889	0.00348041
ENSMUSG00000027133	Nop10	72.41	75.27	58.92	65.21	34.73	37.47	44.71	39.83	-0.886	5.76294e-08
ENSMUSG00000027552	E2f5	15.52	15.35	20.84	17.56	10.04	6.61	9.52	13.52	-0.885	0.0112353
ENSMUSG00000097328	Tnfsf12	65.62	87.32	94.99	81.33	48.96	56.2	31.88	46.78	-0.883	2.20516e-06
ENSMUSG00000056367	Actr3b	9.37	9.87	10.02	11.47	5.86	6.98	6.21	4.39	-0.882	0.0389449
ENSMUSG00000007892	Rplp1	868.62	940.83	938.64	852.04	513.01	509.1	502.21	552.57	-0.881	3.57981e-47
ENSMUSG00000028488	Sh3gl2	176.5	144.69	139.07	169.12	107.96	76.4	96.05	86.98	-0.88	1.64719e-10
ENSMUSG00000024963	Dnajc4	36.53	27.04	28.06	29.02	18.83	19.1	17.39	14.62	-0.88	0.000379041
ENSMUSG00000068615	Gjd2	14.55	11.69	14.83	10.03	8.37	8.82	8.28	3.65	-0.878	0.0450929
ENSMUSG00000045948	Mrps12	43.32	41.65	26.05	31.17	18.83	16.9	19.05	40.57	-0.877	0.0053891
ENSMUSG00000032599	Ip6k2	116.7	108.15	86.17	91.01	65.28	41.51	63.76	58.47	-0.876	2.5837e-07
ENSMUSG00000033416	Gucd1	31.68	35.44	28.46	38.34	17.16	18.73	16.15	29.6	-0.875	0.000867259
ENSMUSG00000034110	Kctd7	9.37	11.33	14.03	10.75	6.28	7.35	7.45	5.12	-0.875	0.033639
ENSMUSG00000036594	H2-Aa	36.53	21.56	45.29	26.87	32.22	22.41	15.32	9.14	-0.872	0.0364103
ENSMUSG00000025035	Arl3	461.95	533.08	508.2	508.79	265.71	281	325.01	299.31	-0.87	1.96284e-27
ENSMUSG00000030269	Mtmr14	30.39	30.69	17.63	21.86	16.74	15.43	4.55	17.54	-0.868	0.0248271
ENSMUSG00000084826	AI847159	202.36	234.57	213.62	237.55	107.12	129.3	139.53	138.14	-0.867	1.77788e-16
ENSMUSG00000023495	Pcbp4	1155.68	1156.76	949.86	1056.27	492.5	650.89	684.38	647.59	-0.865	7.14833e-21
ENSMUSG00000038812	Trmt112	90.19	101.21	81.76	94.95	38.5	49.96	70.8	58.11	-0.863	5.69143e-07
ENSMUSG00000033066	Gas7	65.3	51.52	64.53	67.36	50.21	43.71	23.19	29.24	-0.863	0.000372798
ENSMUSG00000005374	Tbl2	15.52	10.96	15.63	16.84	5.44	11.75	8.28	8.77	-0.862	0.0281968
ENSMUSG00000024862	Klc2	26.83	28.86	28.86	35.47	19.67	18	15.73	16.81	-0.861	0.000302552
ENSMUSG00000059772	Slx1b	19.4	8.04	24.05	21.86	9.21	10.28	14.9	10.96	-0.859	0.0331824
ENSMUSG00000002459	Rgs20	29.42	34.34	32.86	36.9	20.09	15.43	17.39	26.31	-0.855	0.000497237
ENSMUSG00000036192	Rorb	690.5	625.51	589.16	633.12	367.81	377.6	350.27	394.33	-0.853	8.98533e-29
ENSMUSG00000054792	Klhl18	135.77	147.61	141.88	136.51	84.11	74.57	80.32	91.73	-0.853	7.62157e-15
ENSMUSG00000026594	Ralgps2	168.1	112.9	116.63	127.91	81.18	69.42	71.21	73.82	-0.853	4.20879e-09
ENSMUSG00000000552	Zfp385a	322.62	345.28	365.52	335.37	211.31	192.84	211.15	191.13	-0.852	4.23509e-25
ENSMUSG00000050373	Snx21	19.72	14.25	11.62	18.27	8.79	11.75	9.52	7.67	-0.852	0.02232
ENSMUSG00000030659	Nucb2	55.93	53.71	48.9	48.01	24.69	26.08	40.57	33.26	-0.851	2.64584e-05
ENSMUSG00000029406	Pitpnm2	29.74	32.15	48.09	40.13	23.43	23.14	21.53	19.73	-0.847	0.000441156
ENSMUSG00000040276	Pacsin1	143.53	141.4	137.87	144.04	72.39	74.93	93.16	95.02	-0.846	1.05156e-12
ENSMUSG00000057278	Snrpg	40.41	23.02	25.25	37.98	26.36	11.02	15.32	22.66	-0.846	0.0177658
ENSMUSG00000024424	Ttc39c	15.52	14.98	31.66	20.78	11.72	7.71	16.56	10.6	-0.846	0.0362634
ENSMUSG00000086013	Gm15706	129.63	131.53	128.65	119.67	70.3	71.26	81.56	78.57	-0.845	5.14997e-14
ENSMUSG00000037210	Fam193a	344.92	275.85	234.46	266.93	182.86	163.82	144.08	151.3	-0.845	8.88699e-12
ENSMUSG00000053716	Dusp7	70.47	81.48	63.32	67	29.71	40.04	67.9	43.86	-0.845	5.67573e-05
ENSMUSG00000054580	Pla2r1	94.07	99.02	86.17	89.22	55.23	49.96	63.35	50.8	-0.841	8.75401e-10
ENSMUSG00000055745	Ldoc1l	31.68	31.06	29.26	27.59	13.81	24.98	19.87	14.25	-0.84	0.00190322
ENSMUSG00000026989	Dapl1	169.39	197.67	159.51	202.44	124.69	95.87	103.51	110.73	-0.839	7.12863e-12
ENSMUSG00000045103	Dmd	278.66	239.68	222.84	235.4	135.57	150.6	147.39	140.7	-0.837	1.02877e-16
ENSMUSG00000060538	Tmem219	11.96	15.35	19.24	22.57	9.62	9.55	15.73	7.31	-0.837	0.0385478
ENSMUSG00000029166	Mapre3	164.54	147.24	157.91	144.4	93.73	94.77	85.7	91.73	-0.836	8.81661e-15
ENSMUSG00000048988	Elfn1	31.68	40.56	69.34	54.46	38.5	22.41	15.32	34.72	-0.835	0.0164804
ENSMUSG00000073684	Faap20	21.01	10.23	20.44	16.12	8.79	12.86	12.01	6.94	-0.835	0.0410627
ENSMUSG00000029804	Herc3	127.37	134.46	142.68	120.75	77.83	87.05	76.18	71.63	-0.834	1.47081e-12
ENSMUSG00000025049	Taf5	24.89	30.69	22.84	21.14	11.72	22.04	15.73	12.06	-0.833	0.00811125
ENSMUSG00000041408	Wapl	209.48	187.44	214.02	171.98	162.77	98.81	112.61	122.43	-0.832	8.66735e-10
ENSMUSG00000005732	Ranbp1	58.83	47.5	47.29	51.24	15.9	44.08	24.84	36.91	-0.826	0.00249786
ENSMUSG00000032131	Abcg4	25.86	38.73	43.28	40.49	17.57	22.77	28.15	21.2	-0.82	0.00136505
ENSMUSG00000021645	Smn1	28.77	42.02	34.87	44.79	14.65	20.94	29.81	24.49	-0.819	0.00258944
ENSMUSG00000018921	Pelp1	38.15	25.21	26.05	22.57	11.3	14.33	19.46	20.83	-0.819	0.00967267
ENSMUSG00000015882	Lcorl	68.21	50.79	46.49	38.34	41.84	26.81	28.57	25.95	-0.818	0.00126905
ENSMUSG00000040390	Map3k10	18.1	17.9	14.83	15.05	9.21	10.28	10.76	9.5	-0.818	0.0100688
ENSMUSG00000035439	Haus8	10.67	24.11	16.03	13.26	10.04	7.35	9.11	10.23	-0.818	0.0473466
ENSMUSG00000022243	Slc45a2	21.66	25.58	23.25	20.78	10.04	11.39	24.84	14.98	-0.817	0.0136607
ENSMUSG00000019659	Ccdc12	51.08	40.56	49.7	43.71	28.45	27.55	31.88	24.12	-0.816	3.57873e-05
ENSMUSG00000021708	Rasgrf2	142.88	126.05	88.17	89.93	63.6	77.5	53.41	67.24	-0.815	1.96663e-05
ENSMUSG00000030978	Rrm1	25.54	16.44	18.84	17.2	8.37	12.86	21.12	9.5	-0.815	0.0371461
ENSMUSG00000052727	Map1b	1137.25	1009.88	924.61	1065.23	640.63	615.62	634.7	614.7	-0.814	2.32632e-28
ENSMUSG00000021396	Nxnl2	53.02	100.84	103	88.5	39.75	66.85	54.24	55.55	-0.813	0.000133843
ENSMUSG00000028125	Abca4	254.09	267.45	240.87	268.37	164.03	149.87	154.85	156.05	-0.812	1.33735e-20
ENSMUSG00000039860	Srrm3	51.08	30.69	46.89	43.71	23.85	33.79	28.57	16.45	-0.812	0.00346191
ENSMUSG00000042570	Mier2	26.83	33.25	40.08	28.31	15.48	16.53	19.87	25.58	-0.811	0.0023388
ENSMUSG00000025997	Ikzf2	39.44	54.81	42.08	53.03	25.94	28.65	29.4	30.7	-0.809	5.53296e-05
ENSMUSG00000042115	Klhdc8a	53.66	29.23	43.69	34.4	20.92	28.65	27.33	18.64	-0.806	0.00391391
ENSMUSG00000048458	Fam212b	24.89	19.73	20.04	17.92	11.3	12.49	14.49	12.06	-0.806	0.00605789
ENSMUSG00000041534	Rbp3	1226.15	1120.23	1199.15	1242.94	718.88	760.35	742.35	702.78	-0.801	1.41135e-36
ENSMUSG00000028023	Pitx2	15.84	15.71	19.24	10.75	8.37	10.28	10.76	8.04	-0.799	0.0309291
ENSMUSG00000031142	Cacna1f	56.25	46.77	58.11	43.71	25.52	26.45	33.54	46.41	-0.797	0.000507971
ENSMUSG00000085438	1700020I14Rik	488.78	477.17	493.37	502.34	246.88	330.59	287.75	318.68	-0.796	1.47855e-19
ENSMUSG00000033419	Snap91	49.14	68.69	91.38	61.99	37.66	37.47	50.93	34.72	-0.794	0.000300944
ENSMUSG00000000308	Ckmt1	57.22	38	43.69	49.45	19.25	38.57	29.4	28.87	-0.794	0.0016736
ENSMUSG00000001211	Agpat3	701.81	720.15	669.31	729.86	443.96	445.56	428.93	415.16	-0.792	1.92609e-32
ENSMUSG00000040907	Atp1a3	370.79	374.14	353.49	375.5	241.02	221.13	219.85	225.12	-0.79	5.55323e-24
ENSMUSG00000009076	Zmat5	32.97	27.77	26.45	18.63	15.06	23.14	11.18	16.81	-0.79	0.017188
ENSMUSG00000038065	Mturn	41.7	29.6	41.28	49.45	24.69	26.08	31.47	16.45	-0.787	0.00370905
ENSMUSG00000036099	Vezt	30.06	31.42	41.68	40.85	21.76	28.28	21.94	16.45	-0.786	0.00230332
ENSMUSG00000034452	Slc24a1	2312	1813.33	1671.28	1981.04	1104.68	1208.47	1159.27	1204.19	-0.785	4.43299e-20
ENSMUSG00000042675	Ypel3	216.59	199.49	173.94	195.63	112.98	121.21	115.1	135.95	-0.785	7.27246e-13
ENSMUSG00000018199	Trove2	121.87	132.26	114.62	123.61	109.63	70.89	79.91	65.42	-0.785	1.14453e-07
ENSMUSG00000003810	Mast2	35.56	35.81	33.67	42.64	15.48	23.88	25.26	25.58	-0.784	0.000830368
ENSMUSG00000028402	Mpdz	46.23	32.52	44.09	41.2	28.45	22.41	18.63	31.79	-0.784	0.00137841
ENSMUSG00000037855	Zfp365	72.41	114	98.59	109.28	63.6	62.81	65.42	57.74	-0.783	5.08925e-07
ENSMUSG00000028884	Rpa2	58.19	63.57	50.5	50.16	38.5	31.59	35.19	32.53	-0.783	1.16647e-05
ENSMUSG00000019738	Polr2i	82.76	84.04	67.33	74.88	37.24	55.83	53	44.95	-0.781	4.44262e-06
ENSMUSG00000027589	Pcmtd2	280.59	278.78	264.52	276.25	197.92	187.33	152.36	150.93	-0.779	3.96232e-13
ENSMUSG00000026377	Nifk	39.44	45.31	28.86	42.64	23.01	24.24	28.15	22.66	-0.777	0.000730053
ENSMUSG00000036395	Glb1l2	22.95	79.65	78.95	57.33	64.02	33.43	38.92	35.45	-0.774	0.0230092
ENSMUSG00000027993	Trim2	103.12	91.71	82.96	94.95	58.58	63.91	48.86	60.67	-0.773	1.11096e-07
ENSMUSG00000000776	Polr3d	38.47	19.73	32.86	31.17	23.85	23.88	16.56	8.04	-0.77	0.0443093
ENSMUSG00000056055	Sag	9820.5	8993.96	9063.39	9020.21	5544.32	5801.41	5701.55	5933.95	-0.768	1.21127e-42
ENSMUSG00000029247	Paics	95.36	166.61	167.93	159.44	99.59	87.79	113.03	86.61	-0.768	9.97039e-07
ENSMUSG00000003134	Tbc1d8	31.68	36.54	46.09	34.4	25.11	16.53	28.57	22.66	-0.767	0.00220785
ENSMUSG00000026670	Uap1	25.21	34.34	34.47	35.47	12.13	18.37	23.6	24.85	-0.767	0.00606367
ENSMUSG00000020794	Ube2g1	11.31	27.4	26.85	25.8	15.06	15.06	16.15	13.52	-0.766	0.0237307
ENSMUSG00000059288	Cdyl	44.61	36.9	35.27	43.35	28.87	34.16	21.12	11.33	-0.765	0.0129333
ENSMUSG00000041757	Plekha6	17.13	19.73	12.42	12.18	8.37	9.18	10.76	10.23	-0.763	0.0393095
ENSMUSG00000049811	Fam161a	230.49	232.74	212.42	221.79	140.18	133.34	129.59	160.44	-0.76	6.02337e-15
ENSMUSG00000040554	Aipl1	1104.92	1000.02	963.89	1172	628.5	667.78	674.03	685.6	-0.759	7.19571e-24
ENSMUSG00000070348	Ccnd1	242.13	278.78	303.4	271.23	180.35	163.09	170.58	174.32	-0.757	2.19411e-16
ENSMUSG00000037890	Wdr19	21.34	37.63	35.67	21.5	20.09	22.41	11.18	18.27	-0.757	0.0267621
ENSMUSG00000042606	Hirip3	38.15	29.96	24.05	27.59	14.65	21.3	34.36	14.25	-0.756	0.0262885
ENSMUSG00000064115	Cadm2	378.87	399.35	390.77	380.87	253.57	274.02	229.78	223.3	-0.755	5.61315e-18
ENSMUSG00000048351	Coa7	30.71	29.6	22.84	26.16	15.48	16.16	20.7	16.81	-0.755	0.00345559
ENSMUSG00000035790	Cep19	46.23	35.81	38.88	33.32	15.06	29.75	29.4	21.2	-0.754	0.00503648
ENSMUSG00000029106	Add1	146.76	141.4	150.7	149.41	94.15	99.18	91.5	86.61	-0.752	1.58726e-12
ENSMUSG00000022474	Pmm1	196.87	149.8	171.94	160.88	92.89	113.5	102.26	115.85	-0.751	1.43863e-09
ENSMUSG00000052928	Ctif	106.68	96.46	109.41	98.53	54.82	40.4	89.02	75.28	-0.751	0.00012009
ENSMUSG00000017756	Slc12a7	21.01	23.02	28.86	17.92	20.92	15.79	11.18	10.96	-0.75	0.0297707
ENSMUSG00000032840	2410131K14Rik	22.63	18.63	21.64	26.16	6.7	14.69	13.25	19.37	-0.75	0.033639
ENSMUSG00000013833	Med16	133.19	98.65	98.19	107.85	72.81	69.06	74.11	54.82	-0.749	2.51854e-06
ENSMUSG00000025916	Ppp1r42	21.98	34.71	29.26	23.29	18.41	11.75	15.32	27.41	-0.749	0.0263865
ENSMUSG00000032097	Ddx6	344.28	357.33	363.91	369.05	231.4	224.43	204.11	247.78	-0.748	1.51256e-19
ENSMUSG00000029410	Ppef2	72.73	83.67	81.36	78.11	46.03	34.16	57.96	56.28	-0.748	1.41202e-05
ENSMUSG00000041120	Nbl1	34.27	28.5	40.48	33.68	15.48	22.77	33.54	20.1	-0.748	0.00752114
ENSMUSG00000028391	Wdr31	18.1	20.1	21.24	22.21	16.32	11.02	11.18	13.16	-0.748	0.0121239
ENSMUSG00000060733	Ipmk	77.58	101.21	112.22	91.37	69.04	63.91	55.89	52.63	-0.747	3.12083e-06
ENSMUSG00000025323	Sp4	53.99	90.61	106.61	98.17	69.88	53.26	55.89	52.99	-0.747	0.000136429
ENSMUSG00000023236	Scg5	52.05	52.25	49.3	54.1	28.45	35.63	28.15	39.1	-0.746	5.27066e-05
ENSMUSG00000021719	Rgs7bp	22.63	30.33	27.65	23.29	17.16	13.96	13.25	21.2	-0.746	0.00818849
ENSMUSG00000024590	Lmnb1	48.17	42.75	32.06	41.56	20.5	28.65	26.91	28.51	-0.745	0.00119083
ENSMUSG00000041638	Gcn1l1	24.89	25.21	19.24	21.5	5.02	15.43	14.49	18.64	-0.743	0.0386394
ENSMUSG00000030605	Mfge8	473.58	420.18	393.17	436.05	220.1	279.16	313	271.54	-0.742	2.05338e-12
ENSMUSG00000037977	6430571L13Rik	35.24	22.65	29.66	39.77	22.18	10.65	21.12	24.49	-0.742	0.0222299
ENSMUSG00000037443	Cep85	14.22	25.21	18.44	21.86	14.65	9.92	13.66	12.43	-0.742	0.0284395
ENSMUSG00000030695	Aldoa	1816.11	1769.12	1837.21	1875.34	1043.59	1183.13	1230.9	1176.78	-0.74	1.76127e-32
ENSMUSG00000049353	Rd3	171.98	152.36	169.53	155.14	104.19	95.14	110.96	103.42	-0.74	4.10761e-12
ENSMUSG00000018974	Sart3	41.05	44.21	36.87	54.82	26.78	30.49	26.08	28.51	-0.739	0.000540565
ENSMUSG00000040354	Mars	31.03	21.56	30.46	31.17	20.5	19.84	19.46	13.16	-0.739	0.00878667
ENSMUSG00000042961	Egflam	149.35	138.11	157.91	132.57	85.36	91.46	89.43	102.33	-0.736	9.33757e-11
ENSMUSG00000021690	Jmy	107.65	90.61	94.59	85.99	50.63	69.79	59.21	62.13	-0.736	8.1724e-07
ENSMUSG00000026275	Ppp1r7	87.61	84.04	110.62	87.78	46.03	66.12	65.83	56.65	-0.736	5.3365e-06
ENSMUSG00000018427	Ypel2	47.2	109.25	96.99	62.34	38.5	42.98	58.38	62.49	-0.736	0.00799404
ENSMUSG00000036061	Smug1	36.21	39.83	48.09	46.94	23.43	31.22	28.98	25.22	-0.735	0.000516632
ENSMUSG00000044098	Rsbn1	45.58	55.9	55.31	56.25	25.94	49.22	31.88	35.81	-0.735	0.000710603
ENSMUSG00000031442	Mcf2l	63.68	86.96	78.95	62.34	30.96	59.14	44.71	48.97	-0.733	0.000438577
ENSMUSG00000040722	Scamp5	147.09	133.73	143.48	112.51	85.36	89.26	82.39	88.08	-0.732	2.93664e-09
ENSMUSG00000025757	Hspa4l	293.85	312.39	327.44	288.07	200.85	184.39	190.04	207.58	-0.73	3.19169e-18
ENSMUSG00000038145	Snrk	211.74	170.99	175.95	173.42	126.79	101.75	104.75	131.93	-0.73	6.09499e-09
ENSMUSG00000039166	Akap7	65.3	61.75	71.34	73.45	57.33	42.24	38.09	42.03	-0.73	3.43296e-05
ENSMUSG00000036885	Arhgef26	71.12	73.8	76.15	68.79	34.31	52.89	45.54	50.07	-0.729	8.27779e-06
ENSMUSG00000022911	Arl13b	127.04	92.8	83.76	97.46	56.91	69.79	51.34	70.9	-0.729	3.23779e-05
ENSMUSG00000043418	Lrit2	62.07	112.17	111.82	109.28	54.4	77.87	66.24	67.24	-0.728	6.69691e-05
ENSMUSG00000026240	Cops7b	39.12	36.9	27.65	32.61	24.69	28.28	19.05	14.98	-0.728	0.00941749
ENSMUSG00000045690	Wdr89	33.94	40.56	28.06	51.6	14.65	24.24	28.57	27.77	-0.728	0.0143453
ENSMUSG00000020089	Ppa1	97.63	109.98	107.81	103.91	96.24	58.77	58.79	73.09	-0.727	3.18079e-06
ENSMUSG00000045268	Zfp691	60.45	46.04	53.71	65.21	33.48	55.46	34.36	32.16	-0.727	0.0012771
ENSMUSG00000096740	Lbhd1	158.4	135.19	144.68	134.36	87.04	96.6	90.26	94.65	-0.725	1.63433e-10
ENSMUSG00000039278	Pcsk1n	42.67	47.86	30.86	24.01	24.27	20.94	26.08	24.12	-0.725	0.00945042
ENSMUSG00000038406	Scaf1	17.46	29.96	22.04	21.86	12.55	15.43	15.73	14.62	-0.725	0.0171025
ENSMUSG00000030835	Nomo1	145.79	123.5	133.86	116.45	69.04	78.24	111.37	89.17	-0.723	1.48599e-06
ENSMUSG00000004748	Mtfp1	25.86	23.38	24.05	26.16	12.13	13.59	19.46	19	-0.721	0.00976561
ENSMUSG00000035891	Cerk	139.97	137.74	161.52	163.03	101.26	88.16	96.88	102.33	-0.72	3.50145e-10
ENSMUSG00000066026	Dhrs3	186.52	165.88	177.95	185.6	116.33	100.65	112.2	136.68	-0.719	3.30342e-10
ENSMUSG00000029014	Dnajc2	45.26	40.92	42.88	44.79	21.34	39.3	27.33	28.51	-0.719	0.00153165
ENSMUSG00000041488	Stx3	528.22	505.67	523.03	499.47	363.62	320.3	328.32	321.6	-0.717	1.10102e-21
ENSMUSG00000038485	Socs7	163.57	241.88	265.72	234.69	156.08	149.87	149.05	154.22	-0.717	9.4263e-10
ENSMUSG00000027968	Larp7	55.93	50.06	53.71	55.18	34.73	27.92	36.43	40.2	-0.716	7.80208e-05
ENSMUSG00000054206	Gzmm	60.45	66.13	48.09	50.88	45.19	35.26	38.09	23.39	-0.716	0.00174383
ENSMUSG00000053483	Usp21	48.49	32.88	34.47	43.71	19.25	29.75	35.61	20.83	-0.716	0.0109368
ENSMUSG00000017686	Rhot1	150.97	177.57	199.19	171.63	106.28	109.83	126.28	110	-0.715	3.50145e-10
ENSMUSG00000034320	Slc26a2	55.28	40.19	42.88	58.76	33.06	27.18	35.61	32.53	-0.714	0.000975041
ENSMUSG00000057101	Zfp180	38.47	24.48	36.07	28.31	22.18	14.33	20.29	25.95	-0.714	0.0139405
ENSMUSG00000039826	Trub2	33.94	20.1	27.65	28.66	15.9	20.2	20.7	14.98	-0.713	0.014968
ENSMUSG00000086322	E130218I03Rik	262.82	273.3	232.86	250.09	146.04	175.21	174.72	167.01	-0.71	1.88151e-13
ENSMUSG00000029086	Prom1	550.52	489.6	418.02	490.87	286.63	317.73	331.22	339.15	-0.708	1.08666e-13
ENSMUSG00000022564	Grina	376.93	304.72	318.22	330.35	184.53	225.53	232.27	215.62	-0.708	6.74125e-12
ENSMUSG00000002608	Ccdc97	81.14	51.88	68.13	56.61	44.77	41.87	38.92	38.37	-0.708	0.000344621
ENSMUSG00000026179	Pnkd	42.35	36.9	40.88	44.79	21.76	25.71	31.05	28.87	-0.708	0.000696175
ENSMUSG00000060601	Nr1h2	32.97	39.46	40.88	41.2	17.16	24.24	25.67	34.72	-0.708	0.00497286
ENSMUSG00000034007	Scaper	185.23	150.53	111.42	145.11	102.94	105.79	93.57	82.23	-0.707	9.15476e-06
ENSMUSG00000030265	Kras	200.75	187.8	203.2	172.7	106.28	130.77	126.69	134.12	-0.706	5.92288e-11
ENSMUSG00000038518	Jarid2	83.4	78.92	105.81	93.16	53.98	51.06	59.21	72	-0.706	1.27291e-05
ENSMUSG00000043068	Fam89a	22.63	24.11	22.44	29.02	14.65	15.06	19.05	15.35	-0.706	0.00920793
ENSMUSG00000021983	Atp8a2	31.36	39.46	37.67	42.28	23.85	28.65	20.7	24.85	-0.703	0.00167885
ENSMUSG00000006356	Crip2	28.77	21.56	27.65	28.31	12.97	20.57	14.08	21.56	-0.702	0.016723
ENSMUSG00000018707	Dync1h1	911.29	667.53	626.83	788.26	467.81	462.45	477.79	496.29	-0.7	4.90993e-12
ENSMUSG00000021363	Mak	175.21	150.9	140.68	144.4	99.59	91.46	93.57	112.93	-0.7	1.36875e-08
ENSMUSG00000057522	Spop	156.46	211.91	178.75	189.9	118.84	114.6	125.45	123.16	-0.699	5.54386e-10
ENSMUSG00000070730	Rmdn3	169.39	150.53	128.25	145.47	78.67	96.97	100.61	111.46	-0.699	3.05374e-07
ENSMUSG00000025496	Drd4	149.03	127.88	132.26	122.9	84.52	84.12	77.84	102.69	-0.698	6.02726e-08
ENSMUSG00000038773	Kdm3b	42.67	41.29	35.27	35.83	17.57	38.94	33.12	17.18	-0.698	0.0272632
ENSMUSG00000042978	Sbk1	28.77	35.44	41.28	25.8	18.83	17.26	28.98	21.93	-0.694	0.0134606
ENSMUSG00000042557	Sin3a	62.07	51.88	64.53	54.46	38.08	46.65	32.29	36.18	-0.693	0.000236362
ENSMUSG00000042535	Gtpbp1	189.43	166.24	151.5	180.94	119.67	95.87	117.17	121.33	-0.692	1.30806e-08
ENSMUSG00000022570	Tsta3	28.45	23.75	20.04	25.8	16.74	15.06	16.98	16.08	-0.692	0.011204
ENSMUSG00000026918	Brd3	274.13	256.86	256.5	245.79	135.57	192.84	172.23	171.03	-0.691	9.24068e-11
ENSMUSG00000031029	Eif3f	211.09	190.36	181.56	204.23	102.1	125.26	146.98	137.41	-0.691	6.36418e-09
ENSMUSG00000020755	Sap30bp	30.39	27.4	16.83	32.96	25.11	16.53	14.9	17.18	-0.691	0.0370234
ENSMUSG00000026309	Ilkap	35.24	44.94	48.5	37.98	26.78	28.65	32.71	21.56	-0.689	0.00245974
ENSMUSG00000059708	Akap17b	44.61	39.09	33.67	38.7	42.68	31.96	15.73	19.73	-0.689	0.0346002
ENSMUSG00000015749	Anp32e	622.29	789.93	840.45	732.72	490.41	501.39	529.54	482.41	-0.687	7.28956e-17
ENSMUSG00000018548	Trim37	82.76	88.79	89.78	102.12	56.49	53.26	58.38	75.28	-0.687	7.91456e-06
ENSMUSG00000043421	Hilpda	34.27	29.23	32.86	25.44	15.9	19.84	28.57	18.64	-0.687	0.0130297
ENSMUSG00000020525	Ppm1d	16.16	17.9	28.86	20.42	12.97	16.16	14.49	10.23	-0.686	0.0498093
ENSMUSG00000022425	Enpp2	2469.11	2521.42	2577.86	2602.34	1752	1707.29	1693.36	1538.58	-0.685	6.79744e-29
ENSMUSG00000108841	Frmpd2	32.33	42.75	23.65	38.34	20.92	20.57	20.29	29.97	-0.683	0.0151186
ENSMUSG00000044177	Wfikkn2	313.57	280.24	269.33	271.23	165.7	188.07	204.53	194.06	-0.68	2.84728e-12
ENSMUSG00000024851	Pitpnm1	290.62	277.32	266.52	301.69	216.33	165.29	192.52	187.85	-0.68	1.93325e-11
ENSMUSG00000003955	Fam162a	38.47	42.38	43.28	44.07	39.33	22.77	28.98	25.58	-0.68	0.00291781
ENSMUSG00000032076	Cadm1	201.07	267.45	251.69	233.97	130.13	175.21	171.82	153.13	-0.678	1.16132e-08
ENSMUSG00000024519	Cplx4	380.48	463.66	520.22	434.62	297.51	268.14	284.02	381.17	-0.677	3.18431e-09
ENSMUSG00000004267	Eno2	106.03	109.25	105.01	106.77	62.35	78.24	82.81	60.67	-0.677	1.19168e-06
ENSMUSG00000030688	Stard10	121.22	118.01	112.62	62.7	51.89	62.44	91.91	82.96	-0.677	0.00289932
ENSMUSG00000024777	Ppp2r5b	36.85	32.52	30.06	33.32	15.06	23.51	25.67	23.39	-0.677	0.00638475
ENSMUSG00000046753	Ccdc66	69.83	49.69	30.06	52.67	20.92	37.1	43.89	32.16	-0.676	0.0320347
ENSMUSG00000034931	Dhx8	65.95	51.52	56.11	67.72	33.06	37.83	42.64	47.51	-0.674	0.000411018
ENSMUSG00000039347	Atp6v0e2	256.03	229.82	208.41	247.94	174.49	141.78	141.6	171.77	-0.673	2.88045e-09
ENSMUSG00000046792	Zfp787	38.47	36.9	38.88	48.01	23.01	32.69	26.5	25.95	-0.671	0.00255363
ENSMUSG00000003360	Ddx23	18.75	21.56	26.05	21.5	16.32	16.53	11.59	13.89	-0.671	0.0237465
ENSMUSG00000005609	Ctr9	175.53	161.49	155.91	173.06	120.51	102.11	127.93	89.54	-0.67	2.22653e-07
ENSMUSG00000066900	Suds3	139.33	154.19	141.88	134.36	99.59	91.09	84.88	105.25	-0.669	4.49146e-09
ENSMUSG00000032258	Lca5	48.49	50.42	38.88	44.43	31.8	23.88	36.02	30.7	-0.669	0.00163089
ENSMUSG00000058135	Gstm1	31.36	38.36	31.66	39.05	23.01	28.65	17.8	24.12	-0.668	0.00616527
ENSMUSG00000028677	Rnf220	102.48	78.19	87.37	66.29	38.5	67.22	46.37	67.61	-0.665	0.00299748
ENSMUSG00000044982	Sft2d3	37.5	40.19	49.7	57.33	18.41	34.9	33.95	32.53	-0.665	0.00988777
ENSMUSG00000025104	Hdgfl3	93.1	110.71	92.58	106.77	51.89	71.26	77.01	67.24	-0.664	9.15476e-06
ENSMUSG00000022791	Tnk2	21.98	29.96	22.84	23.65	20.5	17.63	12.42	15.35	-0.664	0.0244705
ENSMUSG00000025733	Rhot2	172.62	187.44	161.52	138.3	152.31	123.79	96.88	92.46	-0.663	5.47272e-05
ENSMUSG00000036158	Prickle1	27.15	39.46	34.87	33.68	26.78	18	25.26	20.83	-0.662	0.00870783
ENSMUSG00000063457	Rps15	526.92	397.89	456.9	404.52	293.33	291.28	329.98	257.28	-0.661	2.08047e-09
ENSMUSG00000026455	Klhl12	34.27	29.23	28.06	28.31	23.43	17.63	18.22	21.56	-0.661	0.00741993
ENSMUSG00000020810	Cygb	181.35	132.99	138.27	139.74	67.79	93.67	112.2	105.25	-0.658	4.43084e-05
ENSMUSG00000037126	Psd	75.64	63.21	70.94	81.33	28.04	61.71	44.3	54.45	-0.658	0.00254547
ENSMUSG00000009647	Mcu	47.52	41.65	41.68	54.1	25.11	30.49	29.4	51.53	-0.656	0.00872767
ENSMUSG00000070565	Rasal2	61.74	44.21	49.7	36.9	23.43	40.04	33.95	30.33	-0.656	0.0102283
ENSMUSG00000028772	Zcchc17	111.2	99.38	86.57	117.16	68.21	58.04	86.53	70.9	-0.655	6.60844e-05
ENSMUSG00000041720	Pi4ka	69.83	77.09	90.18	77.39	45.61	58.04	61.69	46.78	-0.654	7.66773e-05
ENSMUSG00000050552	Lamtor4	85.99	105.96	92.58	104.27	48.54	65.02	69.56	74.92	-0.653	2.80043e-05
ENSMUSG00000071647	Eml3	119.93	125.69	128.65	114.66	83.27	84.48	85.7	77.48	-0.651	1.01375e-08
ENSMUSG00000008958	Vps72	81.79	68.69	69.34	65.57	42.26	41.51	55.89	54.09	-0.651	0.000162783
ENSMUSG00000045257	Morn2	37.5	47.5	38.48	34.4	24.69	33.06	27.33	21.56	-0.651	0.00607139
ENSMUSG00000030108	Slc6a13	339.75	344.18	325.04	337.88	243.11	199.82	216.54	252.9	-0.65	1.54086e-12
ENSMUSG00000006345	Ggt1	53.66	46.77	38.07	26.16	20.5	41.51	30.64	25.22	-0.65	0.0445672
ENSMUSG00000022391	Rangap1	147.41	127.51	150.29	137.59	92.89	102.85	98.12	87.71	-0.649	2.81881e-08
ENSMUSG00000028524	Sgip1	68.21	73.07	78.55	63.06	47.28	56.93	40.57	46.41	-0.649	0.000108124
ENSMUSG00000001158	Snrnp27	181.35	228.36	181.56	200.29	127.21	131.13	133.73	141.43	-0.648	1.22728e-09
ENSMUSG00000001143	Lman2l	28.77	42.38	30.46	39.05	28.04	23.51	26.91	14.62	-0.648	0.0247709
ENSMUSG00000040640	Erc2	26.83	31.06	25.65	33.68	23.85	18.73	12.01	23.02	-0.648	0.0271249
ENSMUSG00000026797	Stxbp1	685.32	734.03	786.34	684	492.92	468.33	497.66	502.51	-0.647	2.45067e-22
ENSMUSG00000031523	Dlc1	89.54	104.86	97.79	96.38	64.44	67.95	68.73	62.49	-0.647	3.06002e-07
ENSMUSG00000041642	Kif21b	45.58	44.94	46.89	54.82	37.66	27.55	32.71	32.89	-0.647	0.000970736
ENSMUSG00000042426	Dhx29	47.2	47.86	65.73	51.6	24.69	40.77	36.02	39.83	-0.647	0.0031955
ENSMUSG00000074129	Rpl13a	37.82	35.81	38.07	33.68	22.18	27.18	18.63	30.33	-0.647	0.00609897
ENSMUSG00000008373	Prpf31	30.71	39.46	24.05	23.65	26.36	16.9	20.29	16.45	-0.646	0.0393124
ENSMUSG00000030374	Strn4	67.56	47.86	54.91	51.6	30.55	41.14	37.68	40.2	-0.645	0.00132514
ENSMUSG00000044375	BC027072	134.48	139.57	120.64	138.3	91.22	107.99	78.25	88.81	-0.644	8.67355e-07
ENSMUSG00000021486	Prelid1	116.38	96.46	96.99	101.4	50.63	68.69	85.7	72	-0.644	8.99623e-05
ENSMUSG00000036622	Atp13a2	33.94	38.36	42.08	39.05	17.57	29.75	32.29	23.39	-0.643	0.00970056
ENSMUSG00000037622	Wdtc1	159.05	142.49	156.31	140.1	94.57	114.24	85.29	111.46	-0.642	3.27173e-07
ENSMUSG00000029345	Tfip11	34.91	30.69	31.66	30.46	22.18	26.45	22.77	11.69	-0.642	0.0246174
ENSMUSG00000044147	Arf6	30.71	29.96	23.65	34.4	23.43	21.67	21.94	10.6	-0.641	0.040369
ENSMUSG00000022193	Psmb5	26.83	18.63	22.44	22.21	13.39	19.1	12.01	16.81	-0.641	0.0404955
ENSMUSG00000041560	Nop53	257	207.9	220.43	233.61	132.65	166.76	160.64	165.19	-0.64	7.75736e-09
ENSMUSG00000022234	Cct5	99.24	118.01	100.2	106.42	80.34	62.81	67.9	78.21	-0.64	2.5735e-06
ENSMUSG00000022665	Ccdc80	37.82	44.21	29.66	43.71	29.71	31.59	22.36	22.66	-0.637	0.0116366
ENSMUSG00000035126	Wdr78	134.16	111.44	114.22	115.01	97.5	73.1	85.7	73.46	-0.634	1.05487e-05
ENSMUSG00000026739	Bmi1	71.77	77.82	72.14	71.3	46.03	51.79	55.07	47.88	-0.634	1.27548e-05
ENSMUSG00000027438	Napb	207.86	195.11	197.99	194.56	145.2	149.5	118.41	131.93	-0.633	2.35e-09
ENSMUSG00000021661	Ankra2	43.64	40.92	38.07	35.83	26.78	27.55	23.6	30.7	-0.633	0.00257975
ENSMUSG00000020894	Vamp2	534.04	449.41	445.27	548.92	330.99	357.03	351.09	320.14	-0.632	7.24323e-11
ENSMUSG00000057132	Rpgrip1	402.79	329.2	264.92	296.67	241.02	210.11	199.56	206.85	-0.632	4.70839e-07
ENSMUSG00000034832	Tet3	96.33	123.5	133.46	130.78	85.36	90.73	80.73	78.57	-0.632	4.11053e-06
ENSMUSG00000033871	Ppargc1b	50.11	50.06	51.7	67	37.66	31.59	42.64	37.28	-0.632	0.00142684
ENSMUSG00000001151	Pcnt	70.8	63.94	57.71	64.14	31.38	62.08	48.03	40.93	-0.63	0.00355388
ENSMUSG00000015461	Atf6b	63.68	46.04	68.53	56.97	34.73	51.06	44.71	32.16	-0.63	0.00527715
ENSMUSG00000048799	Cep120	56.57	53.34	44.49	60.91	34.73	40.04	28.57	44.59	-0.629	0.00277366
ENSMUSG00000029434	Vps33a	40.08	40.92	33.67	32.96	30.13	29.39	24.01	10.6	-0.629	0.038888
ENSMUSG00000026596	Abl2	52.69	47.5	53.3	50.52	36.4	33.43	29.4	40.93	-0.628	0.000695289
ENSMUSG00000079550	Mpp4	132.54	147.61	136.67	145.83	106.7	88.16	79.49	110.37	-0.627	1.37848e-06
ENSMUSG00000039375	Wdr17	54.31	92.44	92.98	66.29	52.72	59.14	48.86	53.36	-0.627	0.00184375
ENSMUSG00000027637	1110008F13Rik	84.37	72.34	98.59	68.08	62.77	52.53	34.36	63.96	-0.626	0.00297255
ENSMUSG00000029577	Ube3b	111.85	88.79	105.81	93.16	67.79	72.36	69.14	66.51	-0.625	5.82671e-06
ENSMUSG00000005125	Ndrg1	93.1	108.52	119.84	112.51	66.95	86.69	82.81	59.2	-0.625	7.93991e-05
ENSMUSG00000017754	Pltp	341.69	347.1	361.51	374.78	250.23	238.39	233.1	261.67	-0.624	6.88964e-15
ENSMUSG00000048503	Tmem136	60.77	76.36	80.56	72.73	51.47	52.53	38.92	55.55	-0.623	0.000327044
ENSMUSG00000031174	Rpgr	36.21	27.04	26.85	23.65	19.25	23.51	19.05	16.45	-0.623	0.0293228
ENSMUSG00000044876	Zfp444	119.29	142.49	128.65	146.9	88.29	91.83	100.19	91	-0.622	1.75708e-07
ENSMUSG00000095930	Nim1k	99.89	103.4	100.6	84.92	58.58	61.71	74.52	73.82	-0.622	1.09565e-05
ENSMUSG00000032977	Fam207a	63.04	48.59	39.28	55.18	33.06	38.57	31.05	40.57	-0.622	0.00518215
ENSMUSG00000001518	Itfg2	30.39	26.67	22.04	21.86	11.72	20.2	16.56	21.2	-0.622	0.0464867
ENSMUSG00000022257	Laptm4b	520.46	592.27	529.44	485.86	389.57	357.03	374.28	349.38	-0.62	2.69797e-14
ENSMUSG00000032343	Impg1	65.95	55.17	56.91	68.44	23.01	65.38	48.03	38.01	-0.62	0.0217864
ENSMUSG00000090083	Rnf8	33.94	23.75	33.27	24.01	24.27	23.51	14.49	17.18	-0.62	0.0443093
ENSMUSG00000031201	Brcc3	27.8	35.81	30.46	21.5	21.34	15.43	18.63	24.49	-0.619	0.0347318
ENSMUSG00000064368	mt-Nd6	35.88	55.17	42.48	30.1	23.85	41.51	25.67	25.22	-0.619	0.0375644
ENSMUSG00000020444	Guk1	340.72	314.58	343.47	321.04	222.61	233.98	222.75	234.99	-0.618	1.32782e-14
ENSMUSG00000036469	March1	113.47	105.96	96.19	118.24	89.55	73.46	77.42	50.07	-0.617	0.000330086
ENSMUSG00000024392	Bag6	99.24	129.71	107.01	104.98	66.11	67.95	86.95	84.42	-0.616	2.72109e-05
ENSMUSG00000033166	Dis3	25.21	32.15	24.45	30.46	20.92	12.86	22.36	21.2	-0.616	0.0327967
ENSMUSG00000046691	Chtf8	169.39	145.05	151.5	163.74	84.94	125.26	95.64	126.08	-0.615	1.80602e-05
ENSMUSG00000071646	Mta2	53.99	64.31	55.31	59.84	40.17	46.28	37.68	37.64	-0.615	0.000356496
ENSMUSG00000044768	D1Ertd622e	30.06	36.17	55.31	37.98	22.18	22.77	26.5	34.72	-0.615	0.028798
ENSMUSG00000050856	Atp5k	559.57	565.96	513.41	515.59	342.28	353.73	419.82	388.12	-0.614	1.08666e-13
ENSMUSG00000046185	Zfp84	27.8	24.11	30.86	37.98	21.34	29.75	19.05	16.08	-0.614	0.0484464
ENSMUSG00000026819	Slc25a25	46.55	40.56	48.09	41.56	27.62	31.22	36.02	28.14	-0.613	0.00241202
ENSMUSG00000039771	Polr2j	67.89	60.29	77.75	51.95	45.19	31.96	43.89	60.3	-0.613	0.00731472
ENSMUSG00000018076	Med13l	364.32	388.39	358.3	338.24	238.09	254.18	286.09	234.99	-0.612	1.20206e-11
ENSMUSG00000047412	Zbtb44	68.21	70.15	73.34	70.59	49.79	51.06	50.51	44.95	-0.612	2.73544e-05
ENSMUSG00000027466	Rbck1	46.55	43.11	44.49	49.8	35.99	20.94	27.74	40.93	-0.612	0.0119205
ENSMUSG00000028411	Aptx	22.63	21.19	21.64	20.78	15.48	12.49	14.9	17.18	-0.612	0.0307091
ENSMUSG00000036529	Sbf1	28.77	24.48	36.07	33.32	17.57	20.94	24.01	22.66	-0.611	0.0190145
ENSMUSG00000026987	Baz2b	431.56	397.52	366.32	403.45	276.59	302.3	286.51	245.95	-0.609	1.6008e-10
ENSMUSG00000025359	Pmel	214	261.24	276.94	231.82	163.19	176.31	164.37	180.54	-0.609	1.93025e-09
ENSMUSG00000018377	Vezf1	268.31	269.28	262.92	235.76	166.54	214.88	193.35	157.51	-0.609	6.94132e-08
ENSMUSG00000028906	Epb41	610	538.19	523.83	542.47	366.97	388.25	374.69	403.83	-0.608	6.77585e-15
ENSMUSG00000003585	Sec14l2	96.98	80.75	78.95	80.26	51.05	62.81	70.8	51.16	-0.608	0.000312288
ENSMUSG00000036779	Papd5	121.87	104.86	95.39	107.13	70.72	87.05	80.32	58.47	-0.606	0.000171182
ENSMUSG00000032269	Htr3a	25.54	25.58	38.07	29.74	27.2	14.69	23.19	18.27	-0.606	0.0496092
ENSMUSG00000021803	Cdhr1	754.18	798.7	764.7	787.54	551.5	489.63	553.14	573.4	-0.604	4.69818e-20
ENSMUSG00000040681	Hmgn1	1612.77	1468.42	1419.99	1516.33	1114.3	962.74	1090.96	1049.23	-0.603	4.50713e-17
ENSMUSG00000050640	Tmem150c	90.84	95.73	92.18	96.02	68.62	57.3	58.38	84.42	-0.603	8.34035e-05
ENSMUSG00000021684	Pde8b	52.05	63.94	66.53	67.72	49.79	45.18	33.54	45.32	-0.602	0.00149808
ENSMUSG00000024925	Rnaseh2c	29.42	26.67	30.86	25.08	19.67	21.3	20.7	16.81	-0.602	0.0168812
ENSMUSG00000029623	Pdap1	332.96	280.24	256.5	322.11	220.1	189.9	256.28	186.75	-0.601	4.31602e-06
ENSMUSG00000036450	Hif1an	72.09	44.58	63.32	46.58	52.3	40.77	34.78	32.16	-0.601	0.0201955
ENSMUSG00000015766	Eps8	38.79	31.79	39.68	28.31	36.82	22.41	22.77	21.2	-0.601	0.0328138
ENSMUSG00000012848	Rps5	333.61	312.39	321.83	310.65	206.29	202.76	234.75	264.96	-0.6	7.07781e-10
ENSMUSG00000057177	Gsk3a	46.87	65.77	69.34	50.88	31.8	50.32	38.5	42.03	-0.6	0.00634135
ENSMUSG00000001054	Rmnd5b	55.6	48.59	60.12	55.18	51.47	42.98	33.95	25.22	-0.6	0.0128052
ENSMUSG00000028412	Slc44a1	31.03	36.9	40.08	37.62	38.91	21.3	20.29	28.14	-0.6	0.0280301
ENSMUSG00000044475	Ascc1	41.38	36.54	40.08	30.81	25.52	25.71	28.15	25.22	-0.598	0.00670098
ENSMUSG00000041920	Slc16a6	417.98	401.18	382.35	409.18	279.1	249.41	299.75	304.06	-0.596	4.43286e-12
ENSMUSG00000073643	Wdfy1	55.28	52.25	43.69	55.54	28.87	26.81	45.13	44.95	-0.595	0.0127496
ENSMUSG00000017843	Ppp2r5c	289.65	280.6	339.87	319.25	269.89	216.35	196.66	210.87	-0.594	9.91192e-08
ENSMUSG00000040591	1110051M20Rik	54.96	77.09	76.15	59.48	60.67	40.04	51.34	39.83	-0.594	0.0052374
ENSMUSG00000029059	Fam213b	23.6	35.44	40.08	27.59	20.5	17.26	24.01	27.04	-0.594	0.0419069
ENSMUSG00000028639	Ybx1	996.95	1055.19	1054.47	955.95	697.96	689.46	734.07	741.88	-0.593	3.94428e-24
ENSMUSG00000018433	Nol11	59.16	54.44	52.5	52.67	42.26	38.57	35.61	38.01	-0.593	0.000551848
ENSMUSG00000027562	Car2	57.86	81.48	88.17	82.41	58.16	56.2	57.96	49.7	-0.593	0.00060097
ENSMUSG00000063455	D630045J12Rik	22.63	25.94	24.05	24.36	15.48	17.63	20.29	14.98	-0.593	0.0287475
ENSMUSG00000038495	Otud7b	171.65	140.67	138.27	144.04	107.12	102.11	120.9	80.04	-0.592	5.6153e-05
ENSMUSG00000016018	Skiv2l2	107.97	110.34	80.16	108.21	77.41	59.51	69.97	84.79	-0.592	0.000305455
ENSMUSG00000029687	Ezh2	59.48	62.84	44.89	63.42	51.89	37.83	39.33	37.28	-0.591	0.00461421
ENSMUSG00000067924	Cxx1b	35.24	51.15	54.11	42.64	34.31	29.75	47.61	23.02	-0.591	0.0339144
ENSMUSG00000044030	Irf2bp1	64.33	63.57	69.34	70.94	42.26	58.77	42.23	48.24	-0.59	0.000643864
ENSMUSG00000001666	Ddt	130.6	104.13	132.66	122.54	76.16	86.32	97.71	87.34	-0.589	1.35767e-05
ENSMUSG00000014301	Pam16	55.6	43.48	41.28	55.18	41.43	30.12	41.82	21.2	-0.588	0.0292589
ENSMUSG00000045193	Cirbp	235.66	209.72	222.84	211.04	135.99	126.36	177.2	177.61	-0.587	2.2109e-06
ENSMUSG00000032420	Nt5e	43.32	44.21	58.11	40.13	24.27	33.79	31.05	44.22	-0.587	0.0176359
ENSMUSG00000023224	Serping1	57.86	59.92	73.74	57.33	36.82	47.02	43.06	48.61	-0.586	0.000992536
ENSMUSG00000025508	Rplp2	523.37	561.94	555.49	523.12	361.53	416.54	382.97	372.04	-0.585	1.21243e-15
ENSMUSG00000005089	Slc1a2	218.53	230.55	204	204.23	146.87	146.19	156.92	158.61	-0.584	4.17534e-10
ENSMUSG00000048388	Fam171b	70.15	68.32	91.78	69.87	42.68	50.32	59.21	58.47	-0.584	0.00101294
ENSMUSG00000027276	Jag1	75.64	74.17	75.75	77.75	71.97	49.59	51.34	51.53	-0.583	0.000406235
ENSMUSG00000008301	Phax	82.11	80.75	96.19	70.59	65.28	51.79	67.07	50.07	-0.583	0.000721409
ENSMUSG00000030323	Ift122	60.13	80.38	68.13	74.88	43.1	56.93	44.3	56.28	-0.582	0.00105897
ENSMUSG00000111682	AC123069.1	52.05	49.33	49.3	62.34	43.1	30.85	31.88	45.68	-0.582	0.00668997
ENSMUSG00000026439	Rbbp5	33.3	27.04	38.48	28.66	28.45	23.51	16.56	21.93	-0.581	0.0374207
ENSMUSG00000021770	Samd8	148.06	126.42	156.31	149.05	88.71	109.09	99.37	115.12	-0.579	4.67594e-06
ENSMUSG00000020547	Bzw2	166.48	108.52	143.08	139.38	112.14	90.36	89.43	109.27	-0.579	0.000201057
ENSMUSG00000041241	Mul1	27.8	28.5	27.25	28.31	15.48	20.94	21.12	21.93	-0.579	0.0207443
ENSMUSG00000028530	Jak1	178.44	150.9	149.49	152.28	111.72	119.75	86.12	122.79	-0.578	1.66251e-05
ENSMUSG00000007721	Ccdc124	39.76	44.94	52.5	49.45	34.31	30.85	33.54	33.99	-0.578	0.00291781
ENSMUSG00000027782	Kpna4	80.49	87.32	83.36	107.13	69.46	69.79	52.58	61.03	-0.577	0.000528062
ENSMUSG00000070056	Mfhas1	43.64	50.79	48.9	51.95	26.36	36.73	43.89	32.89	-0.577	0.00688881
ENSMUSG00000071180	Smim15	53.66	62.84	62.92	49.09	41.01	64.65	29.4	40.2	-0.577	0.0173377
ENSMUSG00000028882	Ppp1r8	41.7	31.79	32.46	49.09	17.99	28.65	33.95	28.87	-0.577	0.0443227
ENSMUSG00000042207	Kdm5b	306.13	257.22	249.29	218.56	174.07	175.21	196.25	171.77	-0.575	3.94017e-07
ENSMUSG00000039953	Clstn1	882.84	824.28	770.71	758.52	542.3	495.14	623.11	634.8	-0.573	9.20071e-11
ENSMUSG00000037933	Bicd2	104.74	95	82.56	101.4	56.07	65.75	77.42	75.65	-0.573	0.00024045
ENSMUSG00000058546	Rpl23a	518.2	462.92	458.9	518.82	322.62	361.81	366.41	351.94	-0.572	7.35904e-12
ENSMUSG00000013089	Etv5	59.48	62.48	58.11	64.49	47.28	58.04	33.12	40.2	-0.572	0.00559039
ENSMUSG00000015222	Map2	385.01	391.31	387.96	329.99	266.13	271.81	263.73	272.63	-0.57	7.61462e-12
ENSMUSG00000006299	Aamp	206.89	242.24	211.21	257.26	138.08	152.44	177.2	188.94	-0.57	2.58186e-06
ENSMUSG00000050965	Prkca	114.76	110.34	104.2	101.76	91.22	80.08	72.87	67.24	-0.57	6.07799e-05
ENSMUSG00000022957	Itsn1	91.81	65.77	70.14	59.12	50.21	69.42	42.64	45.68	-0.57	0.0109368
ENSMUSG00000039137	Whrn	42.99	36.9	40.48	36.19	15.9	23.88	36.02	32.53	-0.57	0.0405072
ENSMUSG00000037400	Atp11b	79.85	78.19	72.14	74.88	51.05	56.2	61.69	50.43	-0.567	0.000146897
ENSMUSG00000039660	Spout1	43.96	35.08	42.08	40.85	25.94	21.3	33.95	35.08	-0.567	0.0205992
ENSMUSG00000029560	Snx8	71.12	61.02	42.08	46.22	40.59	45.18	41.82	22.29	-0.567	0.0473403
ENSMUSG00000034295	Fhod3	36.53	35.08	36.87	36.55	16.74	26.81	25.26	32.89	-0.566	0.0255024
ENSMUSG00000032518	Rpsa	204.63	198.4	205.6	173.06	128.46	154.64	122.97	155.32	-0.564	1.15696e-06
ENSMUSG00000059974	Ntm	135.13	145.78	133.06	157.65	124.69	98.07	70.38	108.54	-0.564	0.00032069
ENSMUSG00000034274	Thoc5	37.82	44.58	39.68	41.92	26.36	22.04	36.43	33.26	-0.564	0.0162612
ENSMUSG00000027165	B230118H07Rik	89.22	91.34	86.97	84.92	30.55	92.93	70.38	57.38	-0.564	0.0180932
ENSMUSG00000024853	Sf3b2	706.98	606.88	549.88	559.31	432.25	451.43	385.87	429.41	-0.563	1.52426e-09
ENSMUSG00000041453	Rpl21	190.4	256.49	262.52	268.01	183.28	193.21	133.73	187.11	-0.562	3.06745e-05
ENSMUSG00000021051	Ppp2r5e	172.62	127.15	139.07	156.58	106.28	98.44	101.44	119.87	-0.562	4.17943e-05
ENSMUSG00000047747	Rnf150	54.63	63.21	59.72	58.76	41.01	56.93	40.99	36.91	-0.561	0.00371434
ENSMUSG00000062980	Cped1	32	32.88	27.65	39.77	20.92	23.14	34.36	20.83	-0.561	0.0456509
ENSMUSG00000041841	Rpl37	545.03	527.6	587.15	530.64	391.66	385.32	363.1	456.82	-0.559	1.47462e-11
ENSMUSG00000025316	Banp	54.63	51.88	42.48	39.77	29.71	39.3	26.08	40.93	-0.559	0.019595
ENSMUSG00000087278	A930006I01Rik	33.3	34.34	26.85	38.34	22.6	24.24	23.19	25.95	-0.559	0.0199373
ENSMUSG00000020362	Cnot6	425.42	484.48	490.56	486.93	306.3	386.42	337.02	344.26	-0.557	2.6984e-10
ENSMUSG00000018501	Ncor1	599.34	524.67	503.39	553.22	406.3	375.77	405.75	382.64	-0.556	1.93325e-11
ENSMUSG00000036427	Gpi1	271.54	206.43	241.27	281.62	181.18	202.39	184.24	168.84	-0.556	3.47965e-06
ENSMUSG00000025264	Tsr2	42.02	40.19	40.88	34.4	29.29	24.24	29.81	30.7	-0.556	0.0093242
ENSMUSG00000019971	Cep290	271.87	270.01	237.67	265.86	186.21	206.8	195.83	165.92	-0.555	6.82514e-08
ENSMUSG00000070319	Eif3g	88.57	102.3	99.4	81.33	46.03	75.3	70.8	68.34	-0.555	0.00102333
ENSMUSG00000024491	Rbm27	115.41	151.63	131.86	113.58	118.84	65.75	107.65	79.67	-0.555	0.00457551
ENSMUSG00000029060	Mib2	42.02	34.71	30.06	29.74	17.99	29.02	28.57	23.39	-0.555	0.0438175
ENSMUSG00000029657	Hsph1	31.03	28.13	36.87	41.56	34.73	23.51	21.12	23.39	-0.554	0.0496092
ENSMUSG00000090137	Uba52	422.51	353.68	362.71	359.02	225.54	256.39	287.75	301.87	-0.553	2.50998e-07
ENSMUSG00000042148	Cox10	59.48	52.25	40.08	52.31	32.22	42.24	35.19	39.1	-0.551	0.00968544
ENSMUSG00000042772	Smg7	215.94	188.17	189.17	197.42	142.69	136.64	130	173.59	-0.55	2.37325e-06
ENSMUSG00000027245	Hypk	36.85	42.38	35.67	37.26	27.62	27.55	30.64	24.85	-0.55	0.00968544
ENSMUSG00000034940	Synrg	246.98	213.38	220.83	232.9	148.96	177.05	151.95	186.75	-0.549	3.94017e-07
ENSMUSG00000023572	Ccndbp1	51.08	87.32	87.77	90.29	69.04	52.16	66.66	51.53	-0.549	0.00854867
ENSMUSG00000026127	Imp4	27.48	27.77	25.65	21.14	17.99	17.63	21.12	17.54	-0.549	0.0428971
ENSMUSG00000100252	Mir124-2hg	176.5	196.57	206.41	178.79	135.16	137.74	133.32	144.36	-0.548	2.94643e-08
ENSMUSG00000000276	Dgke	90.19	82.57	96.59	87.43	82.01	59.51	54.24	69.8	-0.548	0.000896064
ENSMUSG00000039983	Ccdc32	50.75	33.25	40.48	33.32	27.62	27.18	28.57	28.87	-0.547	0.0265497
ENSMUSG00000036323	Srp72	148.38	161.86	144.28	154.07	124.69	103.58	113.03	103.06	-0.545	2.18095e-06
ENSMUSG00000021270	Hsp90aa1	1885.61	1576.21	1512.17	1720.56	1243.18	1190.48	1145.61	1226.11	-0.544	5.91772e-12
ENSMUSG00000038658	Ric1	42.67	45.67	46.89	53.39	34.73	33.43	33.12	36.18	-0.544	0.00415034
ENSMUSG00000020430	Pes1	41.7	39.09	42.48	35.11	23.01	29.75	32.29	30.33	-0.544	0.0129752
ENSMUSG00000022141	Nipbl	575.41	500.56	506.99	563.25	389.99	411.4	364.76	404.93	-0.54	1.23062e-10
ENSMUSG00000039068	Zzz3	150	145.78	144.68	141.53	114.65	112.77	105.58	92.83	-0.54	3.97538e-06
ENSMUSG00000056394	Lig1	49.14	47.13	53.3	49.8	20.92	31.96	50.1	41.3	-0.539	0.0368794
ENSMUSG00000024248	Cox7a2l	135.45	110.71	118.63	122.18	91.64	94.77	57.55	96.85	-0.536	0.000800589
ENSMUSG00000043154	Ppp2r3a	79.2	75.27	68.53	70.23	48.54	59.51	49.68	57.38	-0.535	0.000662789
ENSMUSG00000034473	Sec22a	35.88	43.11	43.28	32.25	40.59	22.77	28.15	27.04	-0.535	0.0443567
ENSMUSG00000039145	Camk1d	252.47	207.9	227.25	205.66	161.52	170.44	148.22	170.3	-0.534	7.33544e-07
ENSMUSG00000022816	Fstl1	123.81	128.25	146.69	120.03	64.44	105.79	96.88	99.04	-0.534	0.000332906
ENSMUSG00000031691	Tnpo2	70.8	60.29	72.54	63.06	38.91	53.26	43.06	65.78	-0.534	0.00878431
ENSMUSG00000031144	Syp	72.09	91.71	118.63	125.76	75.74	77.87	77.42	74.19	-0.533	0.00343294
ENSMUSG00000027931	Npr1	40.08	42.02	59.32	44.07	27.2	33.43	32.29	40.93	-0.533	0.0234474
ENSMUSG00000024613	Tcof1	38.79	46.4	29.26	31.89	24.69	23.14	32.29	27.77	-0.533	0.0441679
ENSMUSG00000046574	Prr12	57.86	49.33	69.34	70.59	41.84	55.46	38.09	46.05	-0.532	0.0116259
ENSMUSG00000031157	Pqbp1	55.28	47.13	58.11	51.95	33.89	36.36	41.4	44.59	-0.531	0.00477311
ENSMUSG00000024856	Cdk2ap2	142.56	160.4	152.3	121.46	99.59	120.48	110.13	95.38	-0.527	8.68372e-05
ENSMUSG00000021681	Aggf1	107.32	115.46	78.15	91.37	73.65	81.54	76.18	61.4	-0.527	0.00238399
ENSMUSG00000006920	Ezh1	42.02	67.59	52.5	56.97	39.75	38.2	49.27	34.35	-0.527	0.0194869
ENSMUSG00000071226	Cecr2	38.15	51.15	44.09	51.6	32.22	36.73	30.22	36.91	-0.526	0.0122218
ENSMUSG00000032536	Trak1	73.38	73.8	100.2	68.44	59	54.36	44.3	81.13	-0.525	0.0166679
ENSMUSG00000024660	Incenp	30.39	32.88	32.86	28.66	19.25	23.14	31.47	20.47	-0.525	0.0474694
ENSMUSG00000024500	Ppp2r2b	224.35	298.14	334.26	299.18	228.05	227	188.8	229.51	-0.524	1.32115e-05
ENSMUSG00000052214	Opa3	81.46	62.11	73.74	74.17	76.16	54	49.68	47.88	-0.524	0.00849357
ENSMUSG00000058301	Upf1	77.26	80.38	64.93	58.76	46.87	54.36	42.64	73.46	-0.521	0.015536
ENSMUSG00000025204	Ndufb8	386.95	335.04	284.96	334.29	251.9	249.41	238.06	252.17	-0.52	5.69143e-07
ENSMUSG00000035620	Ric8b	101.83	90.61	84.97	95.31	71.55	58.77	79.08	68.34	-0.519	0.000576788
ENSMUSG00000024120	Lrpprc	73.38	66.13	65.73	88.5	63.18	53.26	54.65	46.05	-0.519	0.00559039
ENSMUSG00000048154	Kmt2d	84.7	90.61	80.16	91.01	66.95	62.81	59.21	68.34	-0.518	0.000189147
ENSMUSG00000067242	Lgi1	36.21	39.09	38.48	36.9	25.52	25.34	25.67	36.55	-0.518	0.0254608
ENSMUSG00000026851	BC005624	40.73	62.84	57.31	64.14	38.5	41.87	34.78	59.57	-0.518	0.0353025
ENSMUSG00000003345	Csnk1g2	48.17	46.04	55.71	44.07	26.36	38.57	43.89	34.35	-0.517	0.0205992
ENSMUSG00000040265	Dnm3	92.78	62.84	80.96	62.34	63.6	39.67	67.49	48.24	-0.516	0.0325542
ENSMUSG00000054256	Msi1	267.99	406.29	423.63	358.3	264.45	289.08	265.8	304.06	-0.515	1.12826e-05
ENSMUSG00000023110	Prmt5	69.5	69.42	50.1	54.46	42.68	51.06	44.71	43.12	-0.514	0.00934482
ENSMUSG00000020708	Psmc5	183.29	137.38	155.51	158.73	104.61	123.79	120.48	119.87	-0.513	6.69691e-05
ENSMUSG00000022312	Eif3h	181.03	157.84	174.74	152.64	136.41	123.42	117.17	120.24	-0.512	8.59319e-06
ENSMUSG00000022864	D16Ertd472e	192.67	198.4	223.64	212.83	145.62	160.15	186.31	135.22	-0.512	1.65151e-05
ENSMUSG00000023353	Agap3	74.67	77.09	66.53	58.76	47.7	53.26	50.1	55.55	-0.512	0.00230464
ENSMUSG00000024180	Tmem8	45.9	39.83	48.5	49.09	32.22	34.9	34.36	35.08	-0.512	0.00849022
ENSMUSG00000023939	Mrpl14	69.83	65.04	65.33	53.75	36.4	39.67	54.24	73.09	-0.512	0.0328138
ENSMUSG00000005225	Plekha8	53.99	56.27	59.72	65.93	40.17	41.51	40.57	53.36	-0.511	0.005718
ENSMUSG00000036473	Tbc1d24	101.51	79.65	76.95	83.84	91.64	56.57	48.44	72	-0.511	0.0196944
ENSMUSG00000067288	Rps28	294.17	299.6	331.85	309.93	208.8	218.92	307.21	235.36	-0.51	2.58186e-06
ENSMUSG00000027067	Ssrp1	92.13	78.19	78.15	75.96	71.97	67.59	53	50.07	-0.51	0.00525814
ENSMUSG00000074211	Sdhaf1	46.23	43.48	47.29	34.76	34.73	30.85	28.98	33.62	-0.51	0.0185925
ENSMUSG00000028821	Syf2	57.54	70.15	56.91	64.14	43.94	49.59	43.06	48.97	-0.509	0.00282515
ENSMUSG00000030788	Rnf141	29.42	33.61	42.88	37.26	24.27	25.71	26.91	29.6	-0.509	0.0339177
ENSMUSG00000038374	Rbm8a	250.53	228.36	190.77	192.77	146.45	167.5	154.43	167.38	-0.507	2.4997e-05
ENSMUSG00000036825	Ssx2ip	93.75	77.46	74.55	65.21	50.63	62.44	52.17	64.32	-0.507	0.00544897
ENSMUSG00000028461	Ccdc107	75.64	50.79	39.28	60.19	41.84	39.3	41.4	43.86	-0.506	0.0362634
ENSMUSG00000034684	Sema3f	32	28.86	36.07	32.61	27.62	18.73	24.84	25.95	-0.506	0.0444961
ENSMUSG00000063882	Uqcrh	419.28	442.46	380.75	408.46	298.77	303.04	319.21	316.85	-0.505	2.28441e-10
ENSMUSG00000030096	Slc6a6	847.93	1413.62	1392.33	1332.88	960.74	947.68	1066.94	992.59	-0.504	5.09094e-07
ENSMUSG00000040167	Ikzf5	153.87	143.23	114.62	122.9	84.94	115.34	96.88	103.42	-0.503	0.000827896
ENSMUSG00000027367	Stard7	146.12	115.46	101.8	132.21	100.43	88.89	90.67	91.73	-0.503	0.000840586
ENSMUSG00000047989	Ino80c	117.35	86.59	75.35	91.01	64.86	68.69	58.79	76.02	-0.503	0.00542973
ENSMUSG00000025228	Actr1a	103.12	90.61	94.18	95.67	67.79	67.59	67.9	86.61	-0.502	0.000540565
ENSMUSG00000031028	Tub	58.19	70.15	63.73	48.73	41.43	48.85	40.16	49.7	-0.502	0.00945042
ENSMUSG00000038671	Arfrp1	41.7	44.94	44.89	36.55	30.55	37.47	24.01	33.62	-0.502	0.0298597
ENSMUSG00000024158	Hagh	29.74	38.36	40.48	43.71	25.52	31.59	28.98	27.77	-0.502	0.0353969
ENSMUSG00000030161	Gabarapl1	279.3	209.36	182.76	226.09	176.16	141.05	161.47	175.79	-0.501	0.000365811
ENSMUSG00000040760	Appl1	131.25	111.44	110.22	110.36	92.89	96.6	85.29	72	-0.501	0.00073302
ENSMUSG00000038274	Fau	228.23	232.01	246.08	226.8	171.98	167.5	185.07	177.25	-0.5	1.20448e-08
ENSMUSG00000027884	Clcc1	58.83	56.63	51.3	52.31	41.43	41.51	31.88	49.34	-0.499	0.012401
ENSMUSG00000041126	H2afv	242.45	280.97	303.4	291.3	184.53	220.02	214.88	221.83	-0.498	9.7444e-07
ENSMUSG00000034075	Zdhhc5	61.74	80.75	109.41	94.95	69.46	61.34	54.24	78.57	-0.498	0.0189161
ENSMUSG00000024608	Rps14	1370.32	1208.65	1226.01	1200.66	847.34	1054.57	920.38	961.89	-0.497	6.90695e-10
ENSMUSG00000025235	Bbs4	165.19	145.78	150.7	145.11	112.56	121.58	114.69	108.91	-0.497	1.02234e-05
ENSMUSG00000029836	Cbx3	166.48	146.88	137.07	160.88	99.59	118.64	149.05	109.27	-0.497	0.000540565
ENSMUSG00000016319	Slc25a5	54.96	128.98	124.64	104.62	91.22	77.5	91.91	73.82	-0.497	0.0207591
ENSMUSG00000070003	Ssbp4	58.83	46.04	64.13	68.44	39.33	39.67	63.76	45.32	-0.497	0.0331807
ENSMUSG00000064345	mt-Nd2	15511.6	12967	13053.6	14188.3	10763.5	10539.1	9583.86	10606.7	-0.496	1.49954e-10
ENSMUSG00000002395	Use1	151.94	161.49	189.97	166.25	163.19	113.13	137.87	109.27	-0.496	0.000696081
ENSMUSG00000017615	Tnfaip1	99.24	106.32	105.41	101.04	91.64	61.34	74.52	82.23	-0.496	0.00102215
ENSMUSG00000034892	Rps29	834.03	954.35	972.31	975.29	723.9	644.27	670.31	785.74	-0.493	3.2907e-10
ENSMUSG00000026915	Strbp	382.75	334.31	308.61	307.06	246.46	269.98	256.28	217.08	-0.493	8.52734e-06
ENSMUSG00000028013	Ppa2	96.01	97.92	103.4	70.59	74.06	70.52	68.31	70.9	-0.491	0.00165294
ENSMUSG00000055148	Klf2	39.76	63.21	62.12	56.25	38.91	38.2	43.06	49.7	-0.491	0.0237465
ENSMUSG00000002372	Ranbp3	29.74	40.19	46.49	38.7	30.96	30.12	31.47	24.49	-0.49	0.048612
ENSMUSG00000031375	Bgn	100.54	97.19	91.38	96.38	53.98	65.75	80.32	88.08	-0.488	0.00356249
ENSMUSG00000032261	Sh3bgrl2	53.02	56.27	61.32	70.94	52.3	36.73	42.64	51.53	-0.488	0.0169476
ENSMUSG00000053825	Ppfia2	50.75	44.58	41.28	35.47	26.78	30.85	41.82	32.16	-0.488	0.0469998
ENSMUSG00000039765	Cc2d2a	80.49	93.17	75.75	71.66	75.74	52.53	55.07	64.32	-0.487	0.00709619
ENSMUSG00000005483	Dnajb1	54.63	66.5	41.28	55.18	43.52	43.71	41.82	38.37	-0.487	0.0209939
ENSMUSG00000025404	R3hdm2	277.36	310.2	252.5	268.01	211.73	210.84	194.18	224.76	-0.486	7.10692e-07
ENSMUSG00000059273	Zc3h4	63.36	76.36	68.53	61.27	40.17	59.14	50.93	53.72	-0.484	0.00804419
ENSMUSG00000026721	Rabgap1l	32.97	33.98	42.88	30.1	28.04	27.55	24.84	25.58	-0.484	0.0445988
ENSMUSG00000069237	Fam8a1	34.91	37.27	43.69	41.92	32.64	29.39	21.94	35.08	-0.483	0.0478931
ENSMUSG00000038174	Fam126b	273.48	231.28	250.09	249.02	201.69	193.58	181.34	188.58	-0.482	8.56002e-07
ENSMUSG00000058392	Rrp1b	129.95	117.28	117.43	108.92	97.91	95.5	69.56	91.36	-0.482	0.000978917
ENSMUSG00000031848	Lsm4	64.01	84.4	58.11	72.38	41.84	52.53	58.38	59.57	-0.482	0.0147139
ENSMUSG00000028149	Rap1gds1	51.72	58.09	44.49	66.29	43.94	36.73	34.78	54.09	-0.482	0.0401129
ENSMUSG00000020599	Rgs9	159.69	141.4	144.68	139.74	105.45	118.28	105.99	116.58	-0.481	3.06745e-05
ENSMUSG00000046876	Atxn1	104.09	99.02	96.19	104.98	56.07	88.16	85.7	71.63	-0.481	0.00322447
ENSMUSG00000026238	Ptma	319.06	257.95	249.69	265.14	187.88	212.68	204.11	209.04	-0.48	5.54161e-06
ENSMUSG00000035242	Oaz1	173.27	224.34	223.64	232.9	174.91	155.38	185.07	136.68	-0.48	0.000318948
ENSMUSG00000043987	Cep164	58.19	65.77	55.71	51.24	42.68	51.42	35.61	46.05	-0.479	0.0153682
ENSMUSG00000013236	Ptprs	50.75	55.9	53.3	58.04	45.61	32.32	59.21	37.64	-0.478	0.0370234
ENSMUSG00000025608	Podxl	51.4	86.96	68.53	70.59	64.02	43.71	48.44	55.92	-0.477	0.0319592
ENSMUSG00000031068	Glrx3	41.38	34.34	42.88	30.46	28.87	27.18	28.57	29.24	-0.477	0.0437529
ENSMUSG00000038886	Man2a2	315.83	323.72	291.77	296.67	213.4	243.16	240.13	242.3	-0.476	5.44138e-08
ENSMUSG00000027012	Dync1i2	457.1	432.23	386.76	439.63	316.76	338.3	331.22	332.57	-0.475	1.35629e-08
ENSMUSG00000027341	Tmem230	58.51	56.63	67.73	74.88	52.3	31.96	46.37	60.67	-0.475	0.038335
ENSMUSG00000039046	Usp6nl	111.85	92.44	99.4	99.25	81.6	66.12	81.56	80.4	-0.473	0.00107153
ENSMUSG00000047230	Cldn2	62.71	57.73	74.15	77.75	53.14	47.38	45.13	62.86	-0.472	0.0150461
ENSMUSG00000027080	Med19	101.18	100.48	98.19	110.71	74.9	79.71	67.9	92.1	-0.471	0.000971065
ENSMUSG00000028991	Mtor	55.93	63.94	62.52	74.53	62.77	52.53	42.64	42.76	-0.47	0.0244575
ENSMUSG00000048756	Foxo3	74.03	86.59	79.36	69.51	53.98	50.69	70.8	62.49	-0.469	0.00613351
ENSMUSG00000026663	Atf6	33.3	48.23	50.1	44.79	31.38	40.4	31.47	31.79	-0.468	0.0489822
ENSMUSG00000056692	D17Wsu92e	166.81	128.61	147.49	143.68	135.57	96.6	102.26	123.16	-0.467	0.00217897
ENSMUSG00000037503	Fam168b	63.68	68.69	77.75	72.38	52.3	52.53	60.03	52.26	-0.467	0.00319537
ENSMUSG00000069833	Ahnak	96.01	108.52	92.18	101.4	64.02	71.63	81.56	89.17	-0.466	0.00177499
ENSMUSG00000021178	Psmc1	377.9	317.51	284.96	298.82	224.7	229.94	250.49	254.36	-0.465	1.28088e-05
ENSMUSG00000029038	Ssu72	179.74	209.72	246.88	205.66	160.26	167.5	148.22	163.73	-0.463	5.54211e-05
ENSMUSG00000024740	Ddb1	603.86	645.98	658.49	648.17	436.01	471.64	551.07	519.32	-0.462	9.11484e-09
ENSMUSG00000033863	Klf9	262.82	369.39	372.73	352.21	202.94	287.61	307.62	248.51	-0.462	0.00137882
ENSMUSG00000042599	Kdm7a	49.14	53.34	43.69	44.79	34.31	47.75	35.61	32.53	-0.462	0.038058
ENSMUSG00000048106	4632415L05Rik	108.62	86.59	83.76	126.48	75.74	82.28	62.1	86.98	-0.461	0.0177877
ENSMUSG00000000826	Dnajc5	363.03	293.76	282.15	314.95	228.05	268.14	197.9	253.63	-0.46	0.000255218
ENSMUSG00000005982	Naa60	104.74	72.34	82.16	97.1	67.79	65.75	69.56	74.19	-0.46	0.0077093
ENSMUSG00000040813	Tex264	78.23	65.4	61.72	65.93	46.03	44.08	55.89	67.98	-0.46	0.0237211
ENSMUSG00000032601	Prkar2a	282.21	260.14	255.7	259.05	185.37	217.08	223.16	192.96	-0.459	3.97538e-06
ENSMUSG00000029020	Mfn2	87.61	82.21	82.56	102.83	70.72	64.65	64.17	75.28	-0.459	0.00285578
ENSMUSG00000026260	Ndufa10	282.53	246.26	264.12	238.99	178.67	214.51	225.23	181.27	-0.458	5.87608e-05
ENSMUSG00000057637	Prdm2	51.4	58.09	70.94	62.34	37.66	49.22	43.47	56.65	-0.458	0.0261021
ENSMUSG00000079426	Arpc4	88.25	83.67	85.37	102.83	74.48	63.91	77.01	64.32	-0.457	0.00322635
ENSMUSG00000041817	Fam169a	61.74	89.52	97.39	80.98	67.79	73.83	62.93	53.36	-0.457	0.0197478
ENSMUSG00000029777	Gars	84.7	73.8	71.74	73.09	68.21	54.36	50.51	62.49	-0.456	0.00789384
ENSMUSG00000036733	Rbm42	99.24	80.75	70.94	76.32	68.21	51.06	67.07	64.32	-0.456	0.0138712
ENSMUSG00000045969	Ing1	148.7	147.61	122.64	152.28	108.79	105.42	122.14	110	-0.455	0.000279935
ENSMUSG00000020307	Cdc34	57.54	84.4	80.56	76.32	43.52	59.87	71.63	56.65	-0.455	0.0304414
ENSMUSG00000020963	Tshr	166.16	184.15	165.12	183.09	133.9	125.26	148.22	135.59	-0.454	2.41895e-05
ENSMUSG00000054405	Dnajc8	228.23	187.8	207.21	213.19	150.64	180.35	156.92	161.53	-0.454	4.67421e-05
ENSMUSG00000027016	Zfp385b	103.45	104.86	110.62	111.07	75.32	81.54	100.61	80.4	-0.454	0.000974077
ENSMUSG00000019689	Fmc1	74.67	71.61	65.33	65.93	52.3	52.53	81.98	46.05	-0.454	0.0260039
ENSMUSG00000024695	Zfp91	283.18	239.68	257.3	276.61	176.16	218.55	189.62	255.82	-0.453	0.000333213
ENSMUSG00000020936	Nmt1	193.96	173.55	169.13	177.72	113.4	170.07	139.11	140.7	-0.453	0.000727684
ENSMUSG00000031950	Gabarapl2	53.34	61.75	67.73	60.55	43.94	43.71	45.54	55.18	-0.453	0.0119205
ENSMUSG00000034932	Mrpl54	75.64	76	60.92	64.14	45.61	50.32	54.65	64.69	-0.452	0.0150461
ENSMUSG00000028484	Psip1	195.58	183.42	181.56	166.61	182.44	131.13	149.46	125.72	-0.451	0.000831783
ENSMUSG00000024959	Bad	72.41	54.81	60.92	59.48	45.19	48.85	48.86	49.7	-0.451	0.0126484
ENSMUSG00000025823	Pdia4	140.3	95.73	87.37	108.92	64.86	78.24	81.56	111.83	-0.451	0.037792
ENSMUSG00000047675	Rps8	511.41	493.62	515.81	488.01	388.73	367.68	419.41	388.85	-0.45	8.75353e-10
ENSMUSG00000036169	Sostdc1	299.67	299.97	285.76	326.77	218.01	227.74	255.04	244.13	-0.449	9.97039e-07
ENSMUSG00000037234	Hook3	369.82	338.33	347.08	274.82	263.2	282.47	262.91	244.49	-0.448	3.42669e-05
ENSMUSG00000036504	Phpt1	233.72	197.3	206.81	186.32	147.29	175.58	155.67	158.24	-0.448	9.72277e-05
ENSMUSG00000026043	Col3a1	97.95	116.92	147.89	130.42	92.48	66.48	99.78	115.12	-0.448	0.0205527
ENSMUSG00000045128	Rpl18a	469.71	451.96	518.62	505.56	334.75	395.23	359.79	445.49	-0.447	4.97538e-06
ENSMUSG00000024976	Shoc2	158.4	128.61	109.41	117.16	106.7	99.91	95.64	86.61	-0.447	0.00453758
ENSMUSG00000025630	Hprt	91.48	116.55	94.59	73.45	74.9	77.87	70.38	67.61	-0.447	0.0101601
ENSMUSG00000032582	Rbm6	70.15	62.11	76.15	45.15	51.47	51.42	56.31	43.12	-0.447	0.0397063
ENSMUSG00000063796	Slc22a8	345.25	342.72	369.53	349.7	272.82	279.16	263.32	282.13	-0.446	1.03326e-08
ENSMUSG00000022139	Mbnl2	478.43	420.54	428.04	413.84	342.7	303.77	351.92	357.78	-0.445	7.23586e-07
ENSMUSG00000039542	Ncam1	338.78	337.6	327.44	348.27	268.64	261.9	266.63	260.57	-0.444	1.82579e-08
ENSMUSG00000042363	Lgalsl	144.18	169.17	166.73	182.02	146.45	126.36	119.24	125.72	-0.444	0.000339101
ENSMUSG00000025980	Hspd1	69.5	70.15	56.51	79.9	55.23	53.63	42.23	64.32	-0.444	0.0297271
ENSMUSG00000052146	Rps10	258.94	262.34	234.86	239.34	196.67	188.43	212.81	183.83	-0.44	5.68956e-06
ENSMUSG00000021986	Amer2	174.24	151.63	143.88	190.26	111.3	125.62	140.35	139.24	-0.44	0.00147065
ENSMUSG00000019699	Akt3	171.33	134.82	128.25	123.97	113.82	109.83	88.19	111.83	-0.439	0.00424502
ENSMUSG00000024054	Smchd1	78.88	90.61	75.35	70.59	50.21	70.16	56.72	69.8	-0.439	0.0145072
ENSMUSG00000037916	Ndufv1	160.02	144.69	161.92	131.5	110.47	93.67	130.42	130.47	-0.438	0.00224956
ENSMUSG00000037148	Arhgap10	92.45	65.04	74.15	80.62	72.39	64.65	53	55.18	-0.438	0.0268852
ENSMUSG00000041297	Cdk13	85.02	73.8	78.55	91.37	76.57	66.85	56.72	59.2	-0.437	0.0118944
ENSMUSG00000020431	Adcy1	189.43	164.42	175.14	178.08	132.65	153.91	143.67	126.08	-0.436	0.000176179
ENSMUSG00000028977	Casz1	243.1	387.66	374.74	330.71	287.89	275.49	286.09	239.74	-0.435	0.000914293
ENSMUSG00000038718	Pbx3	120.58	146.51	152.3	145.47	91.22	116.44	125.04	109.27	-0.435	0.00166559
ENSMUSG00000038384	Setd1b	95.36	73.07	78.15	82.05	72.39	60.24	61.28	64.69	-0.435	0.0093242
ENSMUSG00000060938	Rpl26	331.02	302.53	267.32	316.74	251.9	242.06	237.65	234.99	-0.434	1.30908e-05
ENSMUSG00000031954	Cfdp1	107	106.69	97.79	110.71	74.48	84.12	86.95	86.98	-0.434	0.00083962
ENSMUSG00000020346	Mgat1	103.45	91.71	107.01	96.38	100.01	56.57	92.74	66.15	-0.433	0.0366301
ENSMUSG00000024501	Dpysl3	385.66	439.54	456.5	429.24	328.47	313.69	349.85	355.59	-0.432	1.65981e-07
ENSMUSG00000026457	Adipor1	365.61	388.02	371.93	348.27	300.86	256.75	288.99	313.56	-0.432	1.07482e-06
ENSMUSG00000017485	Top2b	335.55	291.93	290.17	298.46	233.07	247.2	258.77	218.54	-0.432	1.80761e-05
ENSMUSG00000022472	Desi1	109.59	120.57	109.82	108.92	83.27	78.24	104.33	90.63	-0.431	0.00176488
ENSMUSG00000019362	D8Ertd738e	85.67	88.42	78.15	105.34	69.88	80.08	74.11	54.82	-0.431	0.0194441
ENSMUSG00000015149	Sirt2	156.46	165.15	159.91	152.28	130.13	126.36	118.83	124.99	-0.43	4.25539e-05
ENSMUSG00000090862	Rps13	116.05	130.8	130.66	167.33	92.89	104.69	100.61	119.14	-0.429	0.00416593
ENSMUSG00000061731	Ext1	48.49	59.19	60.52	51.6	35.15	39.67	54.24	45.68	-0.429	0.0437529
ENSMUSG00000001270	Ckb	757.74	791.39	847.66	764.25	614.69	603.87	624.76	654.17	-0.428	6.95788e-12
ENSMUSG00000024966	Stip1	89.54	107.78	88.97	80.98	83.27	76.03	65.42	65.42	-0.428	0.0101045
ENSMUSG00000041781	Cpsf2	40.08	43.84	46.09	48.73	37.24	36	32.71	35.08	-0.428	0.0341702
ENSMUSG00000032327	Stra6	347.19	387.66	385.96	381.59	288.3	283.57	301.82	314.29	-0.427	8.27361e-08
ENSMUSG00000026185	Igfbp5	590.61	690.19	705.79	618.43	547.74	470.9	537.82	502.14	-0.427	2.91215e-07
ENSMUSG00000019943	Atp2b1	444.17	408.48	387.96	403.45	287.89	326.18	328.74	358.51	-0.427	3.52836e-06
ENSMUSG00000037032	Apbb1	125.75	145.78	127.45	146.9	102.94	129.66	103.92	101.23	-0.427	0.00184375
ENSMUSG00000029661	Col1a2	263.14	462.92	428.04	493.38	296.25	321.4	365.58	398.72	-0.427	0.00571092
ENSMUSG00000046138	9930021J03Rik	107	80.38	89.78	95.31	79.08	85.95	67.9	62.13	-0.427	0.0173377
ENSMUSG00000022185	Acin1	289.65	260.87	278.15	259.05	206.29	223.7	223.99	207.95	-0.425	3.94186e-06
ENSMUSG00000023973	Cnpy3	90.51	95.36	84.57	62.34	66.11	66.48	68.31	69.07	-0.425	0.0133281
ENSMUSG00000094483	Purb	1013.12	1072.73	1025.61	1082.78	826.84	828.3	822.67	846.4	-0.424	5.79129e-14
ENSMUSG00000027763	Mbnl1	128.98	168.07	137.87	138.3	87.87	107.62	122.97	128.28	-0.424	0.00480404
ENSMUSG00000066571	4931406P16Rik	72.73	68.69	60.92	61.27	47.7	52.16	58.79	50.8	-0.424	0.0143666
ENSMUSG00000025782	Taf3	64.33	63.21	65.73	66.64	48.96	48.85	45.54	74.92	-0.424	0.033026
ENSMUSG00000029276	Glmn	65.62	75.27	83.36	75.24	64.02	44.08	53.82	76.75	-0.424	0.041893
ENSMUSG00000025362	Rps26	600.63	575.09	556.29	607.68	414.25	464.29	469.09	509.08	-0.423	1.44554e-07
ENSMUSG00000008763	Man1a2	128.98	114.73	101.4	94.59	76.99	107.26	79.49	88.44	-0.423	0.0148442
ENSMUSG00000024413	Npc1	75.64	83.3	67.73	87.78	51.89	79.34	64.59	58.84	-0.423	0.0281968
ENSMUSG00000021149	Gtpbp4	67.89	70.15	72.14	63.78	55.23	37.47	62.93	55.92	-0.423	0.0297707
ENSMUSG00000054302	Eapp	128.01	112.53	98.59	120.03	89.96	105.42	74.11	93.56	-0.422	0.00920671
ENSMUSG00000029922	Mkrn1	81.46	100.48	98.59	85.63	72.81	73.83	57.14	83.32	-0.421	0.0116259
ENSMUSG00000026672	Optn	64.98	71.25	72.94	68.08	47.7	56.2	64.17	51.9	-0.421	0.0122218
ENSMUSG00000056851	Pcbp2	511.41	673.74	650.88	648.88	492.92	530.77	504.7	486.43	-0.42	1.20241e-06
ENSMUSG00000015932	Dstn	351.07	274.76	252.9	286.28	235.16	260.8	214.88	180.54	-0.42	0.00467952
ENSMUSG00000024122	Pdpk1	83.4	107.78	99.8	116.09	74.9	80.08	81.56	87.71	-0.419	0.00622955
ENSMUSG00000058064	Gm10036	193.96	163.69	175.14	188.82	147.29	146.93	150.29	131.2	-0.417	0.00029612
ENSMUSG00000038967	Pdk2	79.52	74.9	62.12	66.29	48.12	52.53	64.59	60.67	-0.417	0.0237465
ENSMUSG00000038776	Ephx1	92.45	89.52	70.94	72.73	64.44	64.65	60.03	70.9	-0.416	0.0146057
ENSMUSG00000003308	Keap1	120.9	113.26	94.99	85.28	74.9	66.85	105.16	90.27	-0.414	0.0371461
ENSMUSG00000034557	Zfyve9	115.08	107.78	93.78	101.76	74.06	116.81	63.76	93.19	-0.413	0.039357
ENSMUSG00000024974	Smc3	277.69	252.47	206	257.26	216.75	195.05	210.32	187.11	-0.412	0.000505488
ENSMUSG00000021302	Ggps1	98.6	93.17	113.82	101.76	103.35	72.73	84.05	74.92	-0.412	0.0119083
ENSMUSG00000037161	Mgarp	135.13	188.53	216.02	160.52	129.72	133.7	156.92	135.95	-0.411	0.00702336
ENSMUSG00000017969	Ptgis	79.85	58.46	62.12	63.42	52.3	56.2	49.27	50.43	-0.411	0.031205
ENSMUSG00000017188	Coa3	98.27	89.15	90.98	77.39	69.88	70.89	67.07	77.11	-0.409	0.00668997
ENSMUSG00000019471	Cdc37	118.96	105.96	108.21	108.21	106.7	85.95	82.81	84.42	-0.408	0.00495001
ENSMUSG00000026618	Iars2	57.22	55.54	57.31	50.88	36.82	44.08	55.07	42.76	-0.408	0.0428971
ENSMUSG00000005871	Apc	97.63	126.42	114.22	96.02	105.45	81.18	77.84	88.08	-0.407	0.0134589
ENSMUSG00000007338	Mrpl49	81.14	106.32	103.8	92.08	55.65	71.63	87.36	86.25	-0.407	0.0261827
ENSMUSG00000025979	Mob4	121.55	116.55	110.62	122.18	84.11	93.67	93.98	106.35	-0.406	0.00176066
ENSMUSG00000027288	Zfp106	462.59	465.48	462.91	458.62	384.55	390.09	348.61	362.17	-0.405	1.10741e-07
ENSMUSG00000033326	Kdm4a	56.57	47.86	63.32	65.21	53.14	43.71	44.3	46.05	-0.405	0.0443698
ENSMUSG00000044600	Smim7	85.67	86.59	75.35	77.75	60.26	54.73	68.31	86.61	-0.404	0.0294849
ENSMUSG00000016664	Pacsin2	71.44	79.65	70.54	53.03	60.26	54	53	56.28	-0.404	0.0326004
ENSMUSG00000009927	Rps25	416.69	360.26	384.76	365.11	261.94	323.24	312.18	324.53	-0.403	5.27817e-05
ENSMUSG00000038437	Mllt6	230.81	228.36	230.85	223.22	186.62	201.29	182.17	161.53	-0.403	9.65006e-05
ENSMUSG00000022237	Ankrd33b	85.34	85.86	108.21	86.35	89.13	58.4	70.8	77.48	-0.403	0.0278079
ENSMUSG00000032120	C2cd2l	224.02	195.11	209.21	227.16	179.09	143.99	180.93	180.54	-0.402	0.000540565
ENSMUSG00000027599	Armc1	102.48	104.86	101	98.53	58.58	86.69	86.53	86.25	-0.402	0.00911461
ENSMUSG00000038398	Upf3a	92.45	89.15	78.55	98.53	64.86	77.87	75.77	70.53	-0.402	0.00915668
ENSMUSG00000031840	Rab3a	163.25	130.8	125.05	137.59	89.55	128.56	122.14	103.06	-0.402	0.0144079
ENSMUSG00000021244	Ylpm1	178.12	156.74	183.96	183.81	158.59	126.36	137.04	144.36	-0.401	0.000935275
ENSMUSG00000034994	Eef2	1215.16	1103.42	1074.11	965.98	776.62	860.63	905.47	933.38	-0.4	3.3228e-06
ENSMUSG00000054611	Kdm2a	120.9	116.19	80.16	94.59	89.13	84.85	77.84	86.98	-0.4	0.0210318
ENSMUSG00000020849	Ywhae	1027.02	910.14	1048.06	1013.63	863.24	813.98	744	815.34	-0.399	1.81097e-07
ENSMUSG00000026743	Mllt10	122.84	145.42	130.66	132.57	103.35	115.34	100.61	108.91	-0.398	0.00102333
ENSMUSG00000021843	Ktn1	342.99	307.64	294.58	327.84	278.26	228.1	261.25	262.76	-0.397	0.000110863
ENSMUSG00000071415	Rpl23	248.27	260.51	251.69	289.15	231.4	182.19	192.11	241.93	-0.397	0.000999857
ENSMUSG00000027472	Pdrg1	106.03	110.34	73.34	89.93	57.74	85.95	76.18	87.34	-0.397	0.0496092
ENSMUSG00000032238	Rora	499.77	469.5	457.7	461.13	415.09	368.42	398.71	335.13	-0.395	2.43827e-05
ENSMUSG00000024063	Lbh	267.66	255.76	249.29	257.26	203.36	214.51	227.71	188.21	-0.395	6.50221e-05
ENSMUSG00000030357	Fkbp4	315.18	256.86	271.73	297.03	251.9	238.76	230.2	191.13	-0.395	0.00143207
ENSMUSG00000026103	Gls	118.32	143.23	161.92	135.08	112.14	114.97	113.03	108.91	-0.395	0.00272247
ENSMUSG00000034349	Smc4	66.59	61.75	70.94	58.76	57.33	54	54.65	42.76	-0.395	0.0356586
ENSMUSG00000017376	Nlk	453.22	419.08	445.27	451.82	338.52	375.03	373.45	345.72	-0.394	9.63209e-07
ENSMUSG00000017548	Suz12	225.96	211.91	186.77	179.51	146.45	182.56	182.17	139.61	-0.394	0.00527715
ENSMUSG00000020180	Snrpd3	154.52	118.38	89.78	116.45	87.45	104.32	97.71	90.27	-0.394	0.0306695
ENSMUSG00000022677	Fopnl	71.44	77.09	85.37	76.32	54.82	82.28	61.69	60.3	-0.393	0.0311111
ENSMUSG00000021537	Cetn3	298.05	236.76	236.46	252.24	184.11	197.25	211.15	221.1	-0.392	0.000626655
ENSMUSG00000027642	Rpn2	90.51	84.04	85.77	100.68	61.51	69.42	74.52	94.29	-0.391	0.0267621
ENSMUSG00000025958	Creb1	84.7	112.17	115.03	102.47	64.44	97.71	85.29	84.06	-0.391	0.0274674
ENSMUSG00000028630	Dyrk2	201.39	215.93	214.42	222.86	187.46	165.29	168.92	171.77	-0.39	6.60844e-05
ENSMUSG00000030428	Ttyh1	88.9	84.77	98.99	110.71	65.28	76.03	76.59	96.48	-0.39	0.0274492
ENSMUSG00000046229	Scand1	144.82	108.52	110.62	126.84	87.87	93.3	130.42	97.94	-0.39	0.0274674
ENSMUSG00000052534	Pbx1	267.99	380.35	432.05	370.84	279.94	275.12	338.67	323.07	-0.389	0.00316286
ENSMUSG00000003068	Stk11	86.64	93.17	84.57	84.56	59.84	77.87	68.73	76.38	-0.389	0.0106531
ENSMUSG00000053754	Chd8	135.45	130.07	127.45	155.14	95.4	111.66	122.55	116.22	-0.388	0.00435196
ENSMUSG00000061130	Ppm1b	191.7	155.28	186.77	222.15	181.6	158.68	130.42	150.57	-0.388	0.0127731
ENSMUSG00000013593	Ndufs2	283.18	247.72	253.3	263.71	217.17	225.9	215.71	194.42	-0.387	0.000152778
ENSMUSG00000003039	Fam32a	187.49	181.22	150.29	167.68	147.29	145.09	139.94	127.55	-0.387	0.00188876
ENSMUSG00000025437	Usp33	85.02	85.86	90.98	69.87	78.67	73.1	54.65	62.86	-0.387	0.0379019
ENSMUSG00000009090	Ap1b1	222.41	241.88	229.65	233.25	177.42	202.76	196.25	177.61	-0.386	6.45781e-05
ENSMUSG00000055296	Tmem245	71.77	75.63	85.37	84.2	59.84	83.01	55.48	66.15	-0.385	0.0381771
ENSMUSG00000001924	Uba1	431.88	344.91	351.49	355.08	275.75	273.28	322.11	311.74	-0.384	0.000325938
ENSMUSG00000033900	Map9	66.27	57	60.92	73.45	54.4	57.3	51.34	47.14	-0.384	0.0407877
ENSMUSG00000034187	Nsf	195.25	227.26	220.03	215.7	187.04	167.13	181.76	163.73	-0.383	0.00019208
ENSMUSG00000002102	Psmc3	351.71	283.16	263.32	308.14	246.88	243.16	238.48	235.72	-0.383	0.000655519
ENSMUSG00000028572	Hook1	116.38	124.23	125.85	99.25	118	96.24	93.57	75.28	-0.383	0.0284395
ENSMUSG00000026361	Cdc73	111.53	106.32	87.37	95.67	93.73	77.87	77.01	79.67	-0.381	0.0162612
ENSMUSG00000026520	Pycr2	83.4	65.04	70.94	63.78	56.91	59.51	53.41	59.94	-0.381	0.0345185
ENSMUSG00000025085	Ablim1	129.31	124.59	136.27	129.35	100.84	98.07	113.44	112.2	-0.38	0.00147802
ENSMUSG00000041235	Chd7	233.4	227.26	224.44	249.74	164.86	192.84	188.8	234.26	-0.378	0.00142684
ENSMUSG00000043716	Rpl7	405.05	347.47	360.71	373.35	277.43	310.75	323.35	306.62	-0.377	5.92626e-05
ENSMUSG00000028478	Clta	303.55	301.07	289.77	275.17	201.27	249.41	264.15	235.72	-0.377	0.00031493
ENSMUSG00000038056	Kmt2c	228.23	291.93	271.33	249.38	209.22	213.41	199.56	228.41	-0.377	0.000327125
ENSMUSG00000034880	Mrpl34	131.57	105.59	109.01	130.42	88.71	86.69	101.02	114.75	-0.377	0.0179156
ENSMUSG00000071644	Eef1g	145.47	142.13	144.28	132.93	127.21	96.97	112.2	124.99	-0.376	0.00416882
ENSMUSG00000021039	Snw1	389.21	351.85	322.63	331.79	286.63	267.04	275.33	307.72	-0.375	0.000153494
ENSMUSG00000037475	Thoc2	341.37	305.82	303.8	345.76	275.33	272.55	238.89	277.75	-0.375	0.000194826
ENSMUSG00000017291	Taok1	360.44	389.12	438.06	413.84	307.97	389.36	324.18	315.76	-0.375	0.000310274
ENSMUSG00000002748	Baz1b	191.37	185.97	187.97	194.2	174.91	149.87	140.77	159.34	-0.375	0.000678538
ENSMUSG00000030591	Psmd8	139.97	193.28	210.81	174.49	145.62	127.83	168.09	157.51	-0.375	0.0119205
ENSMUSG00000032826	Ank2	163.57	173.19	164.32	158.37	125.95	135.54	134.56	145.09	-0.373	0.000442784
ENSMUSG00000030842	Lamtor1	125.43	137.38	149.49	144.04	120.93	140.68	103.51	100.87	-0.372	0.0134284
ENSMUSG00000032480	Dhx30	64.98	69.06	72.54	63.78	61.51	50.69	56.72	53.36	-0.372	0.0268952
ENSMUSG00000038481	Cdk19	279.63	280.97	266.92	296.31	200.01	247.57	238.89	235.36	-0.371	0.000203281
ENSMUSG00000003546	Klc4	79.85	93.9	76.15	92.08	60.67	86.69	69.97	68.34	-0.368	0.0407981
ENSMUSG00000001419	Mef2d	172.95	182.32	189.57	170.91	156.08	159.05	138.7	135.95	-0.366	0.00112098
ENSMUSG00000020409	Slu7	123.16	101.94	94.59	100.32	81.18	93.67	69.56	98.31	-0.366	0.0370234
ENSMUSG00000007670	Khsrp	86.96	99.38	118.23	113.58	72.81	100.65	87.77	82.96	-0.365	0.0337826
ENSMUSG00000029291	Rufy3	254.73	245.16	240.47	243.64	209.22	197.98	215.71	191.5	-0.364	0.000115324
ENSMUSG00000022956	Atp5o	278.66	261.24	263.32	271.59	179.51	231.78	211.15	263.13	-0.364	0.00250231
ENSMUSG00000063077	Kif1b	692.44	643.42	667.71	672.17	570.33	545.47	550.24	548.55	-0.363	6.6446e-08
ENSMUSG00000022415	Syngr1	148.7	113.26	97.39	117.52	85.36	90.73	93.98	112.2	-0.363	0.0407877
ENSMUSG00000031783	Polr2c	105.38	83.67	97.39	110	69.46	83.01	102.26	78.94	-0.362	0.0457071
ENSMUSG00000091537	Tma7	191.7	234.2	234.06	213.91	212.57	186.23	160.64	172.86	-0.361	0.00396549
ENSMUSG00000032010	Usp2	129.95	148.71	167.93	160.88	89.96	132.23	128.76	136.32	-0.361	0.0192904
ENSMUSG00000029461	Fam168a	173.27	176.11	170.33	149.77	134.32	127.09	152.36	141.43	-0.36	0.00212213
ENSMUSG00000019802	Sec63	125.75	104.5	117.03	121.11	99.17	93.67	92.33	103.42	-0.36	0.00751347
ENSMUSG00000021552	Gkap1	124.78	115.82	129.05	105.7	94.15	93.3	94.81	111.46	-0.36	0.00908765
ENSMUSG00000059436	Max	172.3	184.51	180.75	149.77	139.34	145.09	154.85	130.47	-0.359	0.00298403
ENSMUSG00000038467	Chmp4b	218.85	270.01	263.72	265.86	204.2	229.21	218.19	194.42	-0.358	0.00112375
ENSMUSG00000048874	Phf3	139.33	138.48	146.29	140.81	97.91	105.05	166.02	129.74	-0.358	0.0274674
ENSMUSG00000028826	Tmem57	114.11	113.26	130.26	133.29	101.26	96.6	109.3	100.87	-0.356	0.00679808
ENSMUSG00000020840	Blmh	80.82	77.46	68.94	69.15	56.49	65.75	57.96	66.15	-0.356	0.034093
ENSMUSG00000073131	Vma21	58.83	52.98	63.73	56.61	45.61	48.12	49.68	49.34	-0.356	0.0471215
ENSMUSG00000029190	D5Ertd579e	138.36	141.4	120.24	99.97	114.65	108.73	101.44	96.48	-0.355	0.025975
ENSMUSG00000053838	Nudcd3	99.57	121.67	98.99	86.35	86.2	66.85	88.6	92.83	-0.355	0.045829
ENSMUSG00000021500	Ddx46	127.69	101.94	112.62	137.59	103.35	95.5	89.02	112.2	-0.354	0.027194
ENSMUSG00000028936	Rpl22	248.91	284.62	240.07	246.15	185.79	215.62	224.82	222.93	-0.353	0.000850596
ENSMUSG00000022973	Synj1	198.16	215.57	199.19	189.9	170.72	181.82	135.39	169.21	-0.353	0.0031955
ENSMUSG00000003660	Snrnp200	112.5	125.69	116.23	128.27	97.91	104.32	112.61	87.34	-0.353	0.0118944
ENSMUSG00000001506	Col1a1	240.19	282.07	233.26	289.86	168.21	210.11	225.23	258.01	-0.351	0.0143691
ENSMUSG00000005625	Psmd4	340.72	238.95	207.61	233.61	201.69	198.35	211.57	179.07	-0.351	0.0157305
ENSMUSG00000038762	Abcf1	204.63	145.78	131.46	182.37	117.16	139.95	141.6	148.38	-0.351	0.0445643
ENSMUSG00000005698	Ctcf	215.94	168.07	171.54	156.58	146.87	134.07	139.11	155.32	-0.35	0.00949423
ENSMUSG00000020019	Ntn4	108.62	116.19	111.82	137.23	96.66	99.18	94.4	101.6	-0.35	0.0115077
ENSMUSG00000031835	Mbtps1	101.83	100.48	113.82	121.46	84.11	98.07	99.37	83.69	-0.349	0.0193225
ENSMUSG00000021377	Dek	220.79	223.61	181.16	248.66	182.86	183.29	166.02	210.14	-0.347	0.00793257
ENSMUSG00000032030	Cul5	222.73	173.19	155.51	172.34	134.32	152.07	144.08	152.4	-0.347	0.0120562
ENSMUSG00000056342	Usp34	434.47	354.04	365.12	363.32	295.42	300.47	344.06	308.08	-0.346	0.000806288
ENSMUSG00000048118	Arid4a	139.65	120.94	119.43	136.51	86.2	100.65	115.51	130.83	-0.346	0.0349558
ENSMUSG00000040761	Spen	120.58	122.4	117.43	115.01	105.87	92.2	118.41	82.59	-0.344	0.0267973
ENSMUSG00000037062	Sh3glb1	98.27	113.26	111.82	88.86	102.94	71.26	84.88	89.17	-0.344	0.0467642
ENSMUSG00000024498	Tcerg1	119.29	100.11	130.26	107.13	97.91	89.63	93.98	101.6	-0.342	0.0190521
ENSMUSG00000024924	Vldlr	243.1	310.2	300.59	292.73	227.63	234.72	257.52	251.07	-0.34	0.00110766
ENSMUSG00000000738	Spg7	146.44	115.09	117.83	110.71	85.36	112.4	108.47	97.94	-0.34	0.0376733
ENSMUSG00000027566	Psma7	352.36	323.72	342.67	326.41	224.28	283.57	334.12	284.33	-0.339	0.0041665
ENSMUSG00000024474	Ik	139.33	135.92	115.43	136.87	118.84	113.13	101.02	111.46	-0.338	0.0124347
ENSMUSG00000024052	Lpin2	128.34	122.76	103	112.51	92.89	99.54	107.23	93.92	-0.338	0.0184687
ENSMUSG00000030663	1110004F10Rik	117.35	101.57	106.61	110	87.45	96.24	96.05	87.34	-0.337	0.0140105
ENSMUSG00000068290	Ddrgk1	163.25	184.15	153.9	181.3	183.69	125.26	151.95	135.22	-0.336	0.0248324
ENSMUSG00000047888	Tnrc6b	262.49	278.05	260.11	260.13	234.33	221.86	212.4	226.22	-0.334	0.00021522
ENSMUSG00000063200	Nol7	121.87	124.23	114.62	104.62	128.46	89.26	93.57	97.94	-0.333	0.0388711
ENSMUSG00000061477	Rps7	175.86	194.38	209.21	210.68	171.56	188.43	137.87	162.63	-0.33	0.0126381
ENSMUSG00000036371	Serbp1	927.77	785.91	761.9	784.32	662.81	693.5	659.96	681.95	-0.329	2.8548e-05
ENSMUSG00000046330	Rpl37a	237.6	276.95	319.03	333.58	249.39	202.76	249.66	286.15	-0.329	0.0255877
ENSMUSG00000001383	Zmat2	181.03	153.46	144.28	144.04	134.32	120.48	141.18	124.99	-0.328	0.0165415
ENSMUSG00000020661	Dnmt3a	388.57	386.56	326.64	327.13	294.58	320.67	304.72	293.1	-0.326	0.00165884
ENSMUSG00000022995	Enah	192.34	155.65	152.7	140.81	135.57	125.26	129.18	139.97	-0.325	0.0184857
ENSMUSG00000048546	Tob2	131.25	206.43	239.27	213.19	174.91	181.09	176.79	174.32	-0.325	0.0297707
ENSMUSG00000009905	Kdsr	153.55	201.68	167.13	164.82	139.34	137.01	152.78	146.91	-0.324	0.00958152
ENSMUSG00000060036	Rpl3	257.64	285.35	293.38	292.01	228.89	231.41	227.3	285.79	-0.323	0.00257254
ENSMUSG00000026667	Uhmk1	174.24	210.45	218.03	232.9	195.41	132.6	185.9	179.81	-0.323	0.0322005
ENSMUSG00000048000	Gigyf2	144.5	118.38	113.02	120.03	120.51	88.52	107.65	102.69	-0.323	0.0484746
ENSMUSG00000020372	Rack1	305.81	291.2	273.74	284.49	223.03	205.33	274.5	273.36	-0.322	0.00800438
ENSMUSG00000041133	Smc1a	269.93	236.03	229.25	292.01	214.66	259.69	215.71	195.52	-0.322	0.0213953
ENSMUSG00000054226	Tprkb	99.57	110.71	122.24	113.22	92.89	85.22	103.09	97.58	-0.322	0.0221751
ENSMUSG00000015290	Ubl4a	68.53	67.96	79.36	73.81	59	58.4	62.52	66.15	-0.322	0.0496092
ENSMUSG00000068823	Csde1	545.35	586.79	522.63	571.49	487.06	439.31	523.74	446.96	-0.321	0.000279232
ENSMUSG00000037012	Hk1	510.76	524.31	470.12	464.36	381.62	429.03	464.54	404.2	-0.32	0.000541474
ENSMUSG00000028053	Ash1l	344.6	320.43	315.82	312.8	269.89	278.06	279.88	276.29	-0.319	0.000253063
ENSMUSG00000025794	Rpl14	330.38	291.57	272.13	253.68	207.96	254.55	250.49	252.17	-0.318	0.00964826
ENSMUSG00000025781	Atp5c1	153.87	164.78	172.34	150.13	136.83	141.78	137.87	130.1	-0.317	0.00522414
ENSMUSG00000041571	Selenow	134.48	115.46	149.09	143.68	104.61	111.3	122.55	127.18	-0.317	0.0267973
ENSMUSG00000023977	Ubr2	155.17	160.03	171.54	172.7	139.34	141.05	145.32	137.41	-0.316	0.00405933
ENSMUSG00000029422	Rsrc2	316.8	286.82	281.75	293.81	248.97	254.55	241.79	263.5	-0.315	0.000775012
ENSMUSG00000036309	Skp1a	201.72	219.22	229.25	202.44	170.3	217.08	190.87	162.63	-0.315	0.0122218
ENSMUSG00000002580	Mien1	145.15	109.61	129.05	137.23	115.07	101.38	117.17	116.22	-0.315	0.033985
ENSMUSG00000075376	Rc3h2	134.48	117.65	130.66	112.51	120.09	96.6	94.4	112.93	-0.314	0.0380738
ENSMUSG00000038582	Pptc7	119.29	110.71	115.03	122.9	107.12	102.11	100.61	91.36	-0.313	0.0210943
ENSMUSG00000028809	Srrm1	579.62	636.11	559.1	551.78	488.32	496.98	500.97	509.45	-0.31	3.69941e-05
ENSMUSG00000032187	Smarca4	357.86	306.18	313.01	292.73	267.8	253.45	275.33	279.94	-0.31	0.00235071
ENSMUSG00000054452	Aes	254.41	219.95	254.5	247.59	197.08	218.55	191.69	229.87	-0.31	0.0052556
ENSMUSG00000020864	Ankrd40	155.17	174.28	190.77	168.4	147.71	153.17	157.33	131.57	-0.31	0.0123238
ENSMUSG00000027304	Rtf1	105.06	101.21	104.61	99.61	96.24	85.95	70.8	95.38	-0.31	0.0473973
ENSMUSG00000001289	Pfdn5	201.39	210.09	219.63	223.94	194.57	173.74	191.69	174.69	-0.308	0.00303188
ENSMUSG00000013698	Pea15a	399.56	368.66	391.17	429.96	328.06	365.11	336.6	337.32	-0.306	0.000891692
ENSMUSG00000027475	Kif3b	232.43	186.34	186.77	175.57	158.59	177.05	161.47	156.78	-0.306	0.0192489
ENSMUSG00000025135	Anapc11	198.81	156.01	182.76	193.84	154.82	149.13	186.31	149.47	-0.304	0.0306934
ENSMUSG00000021427	Ssr1	192.99	183.42	213.22	183.09	163.61	168.6	182.17	151.67	-0.303	0.0096313
ENSMUSG00000029328	Hnrnpdl	119.29	116.55	122.24	120.03	102.94	92.93	99.78	116.95	-0.301	0.0253785
ENSMUSG00000061983	Rps12	524.98	578.75	580.34	593.7	482.04	492.57	473.65	517.49	-0.3	5.75663e-05
ENSMUSG00000030237	Slco1a4	234.69	223.24	208.81	228.6	221.35	166.03	216.54	174.69	-0.3	0.0279925
ENSMUSG00000026123	Plekhb2	406.99	387.66	376.34	329.99	324.29	296.06	340.33	340.97	-0.299	0.00346479
ENSMUSG00000028998	Tomm7	254.73	267.82	290.57	254.75	251.9	209.37	219.85	241.57	-0.299	0.00478769
ENSMUSG00000035247	Hectd1	172.95	202.05	180.35	202.08	175.33	168.23	147.39	163.73	-0.298	0.0127901
ENSMUSG00000022283	Pabpc1	401.17	520.29	520.62	468.66	343.54	396.7	445.91	461.57	-0.298	0.0142263
ENSMUSG00000001416	Cct3	97.3	104.5	105.01	98.89	83.27	96.24	85.29	85.52	-0.298	0.0328561
ENSMUSG00000053025	Sv2b	378.22	357.7	332.65	319.6	268.64	289.08	324.18	321.97	-0.296	0.00538566
ENSMUSG00000026203	Dnajb2	95.04	89.88	97.79	97.1	77.83	78.61	83.63	88.81	-0.296	0.0375644
ENSMUSG00000031672	Got2	242.13	256.86	244.08	311.72	187.88	239.49	227.71	234.99	-0.295	0.0232759
ENSMUSG00000059534	Uqcr10	209.15	221.41	207.21	203.87	178.67	166.39	212.81	180.9	-0.294	0.00968053
ENSMUSG00000028152	Tspan5	173.92	225.8	246.48	230.03	189.97	204.96	186.31	193.69	-0.294	0.0185224
ENSMUSG00000030120	Mlf2	214.33	185.97	186.77	178.79	156.5	163.09	163.54	178.34	-0.293	0.0125979
ENSMUSG00000026615	Eprs	158.72	142.86	162.32	176.64	156.91	138.85	124.21	136.32	-0.293	0.0351462
ENSMUSG00000021096	Ppm1a	223.05	251.37	221.23	246.15	205.87	200.92	214.47	198.44	-0.29	0.00443705
ENSMUSG00000026623	Lpgat1	171.33	204.97	201.6	186.67	157.75	178.52	171.82	155.69	-0.29	0.0128482
ENSMUSG00000025580	Eif4a3	107	109.61	115.03	111.43	92.06	113.13	94.4	88.81	-0.29	0.0496092
ENSMUSG00000000538	Tom1l2	174.89	149.44	164.72	171.63	146.87	147.66	134.56	146.91	-0.288	0.0180968
ENSMUSG00000067873	Htatsf1	119.29	113.63	109.82	119.31	111.72	103.22	96.05	92.83	-0.285	0.0446494
ENSMUSG00000028234	Rps20	579.29	536	508.2	580.8	497.52	422.05	503.46	497.02	-0.284	0.00303652
ENSMUSG00000047215	Rpl9	245.68	285.72	319.43	287.72	278.26	230.68	245.52	244.86	-0.278	0.0199176
ENSMUSG00000021835	Bmp4	447.72	433.69	449.68	523.12	375.34	365.11	431.41	444.03	-0.276	0.00995671
ENSMUSG00000019179	Mdh2	312.6	264.89	278.15	305.63	243.53	240.23	248.42	289.44	-0.276	0.0165428
ENSMUSG00000030545	Pex11a	159.69	134.82	157.51	160.16	124.69	139.21	129.59	144.72	-0.275	0.036435
ENSMUSG00000059895	Ptp4a3	206.89	257.22	238.07	234.33	215.91	215.25	209.5	176.52	-0.273	0.028119
ENSMUSG00000032902	Slc16a1	886.07	898.08	815.6	842.36	697.12	765.86	822.25	749.92	-0.271	0.000379588
ENSMUSG00000020962	Gtf2a1	239.54	241.88	240.87	239.34	216.75	211.57	225.23	194.42	-0.271	0.00705714
ENSMUSG00000041645	Ddx24	238.57	211.55	205.2	197.42	190.39	180.35	194.59	182	-0.271	0.0183204
ENSMUSG00000027091	Zc3h15	166.16	151.26	147.49	166.97	156.5	125.99	139.53	136.68	-0.27	0.0447561
ENSMUSG00000079037	Prnp	257.64	237.13	250.89	225.37	198.34	212.68	225.23	221.83	-0.268	0.010022
ENSMUSG00000042406	Atf4	348.16	290.47	281.75	292.01	271.57	237.29	274.91	273.36	-0.264	0.0237307
ENSMUSG00000003970	Rpl8	476.17	447.21	430.44	423.87	345.21	385.68	404.92	438.55	-0.263	0.00910551
ENSMUSG00000036854	Hspb6	244.71	232.38	249.29	231.46	251.48	192.47	214.05	208.68	-0.262	0.0272307
ENSMUSG00000033228	Scaf11	174.24	188.53	163.12	171.27	159.43	160.52	133.73	162.99	-0.262	0.0386135
ENSMUSG00000010376	Nedd8	374.99	392.41	335.06	348.63	285.38	321.4	324.6	359.61	-0.258	0.0165168
ENSMUSG00000025350	Rdh5	2436.78	2448.35	2446	2397.03	2161.24	2161.66	2150.86	2187.27	-0.256	8.85377e-07
ENSMUSG00000014313	Cox6c	623.9	586.05	636.05	645.66	533.51	542.9	656.23	533.93	-0.256	0.00522398
ENSMUSG00000027273	Snap25	150.64	162.59	177.95	177	151.89	150.23	136.21	155.69	-0.256	0.0393124
ENSMUSG00000029004	Kmt2e	444.49	453.42	482.15	458.27	420.11	391.93	396.22	431.61	-0.253	0.0016137
ENSMUSG00000021608	Lpcat1	276.39	280.24	237.67	236.12	253.16	208.27	228.54	230.97	-0.253	0.0399194
ENSMUSG00000017781	Pitpna	252.47	215.2	229.65	245.44	212.57	214.15	228.96	180.9	-0.253	0.0469998
ENSMUSG00000030878	Cdr2	562.16	562.31	600.78	541.03	537.28	439.68	550.65	486.79	-0.249	0.0102413
ENSMUSG00000028174	Rpe65	4163.67	4644.96	4754.53	4442.57	4027.89	4035.72	4043.79	4043.07	-0.245	4.87955e-05
ENSMUSG00000049422	Chchd10	690.17	652.19	647.67	710.51	554.43	594.69	649.19	632.61	-0.242	0.00346479
ENSMUSG00000024012	Mtch1	660.11	576.92	575.13	604.81	512.59	587.71	513.81	558.79	-0.238	0.0119399
ENSMUSG00000005610	Eif4g2	803.64	884.93	950.67	937.31	849.85	823.53	796.17	766.73	-0.232	0.00510325
ENSMUSG00000038690	Atp5j2	354.95	355.14	343.07	346.48	277.01	312.59	330.81	344.99	-0.23	0.0222299
ENSMUSG00000061787	Rps17	252.79	291.2	275.74	291.66	259.43	243.16	269.53	241.2	-0.222	0.0378109
ENSMUSG00000022403	St13	471	393.87	389.97	403.45	392.5	357.4	383.39	357.42	-0.221	0.041893
ENSMUSG00000022961	Son	811.72	769.84	770.71	711.23	681.64	655.29	762.64	699.49	-0.22	0.00802042
ENSMUSG00000007836	Hnrnpa0	197.52	204.24	195.18	206.38	181.6	189.9	173.89	188.94	-0.218	0.0433123
ENSMUSG00000064370	mt-Cytb	12117.3	15117.9	15904	16616.2	14852.9	13203.6	14002.3	14219.3	-0.21	0.0359147
ENSMUSG00000003316	Glg1	381.45	348.56	339.87	374.78	323.03	337.2	323.77	351.94	-0.203	0.0412806
ENSMUSG00000069769	Msi2	549.88	662.42	648.87	580.8	527.65	595.05	567.21	564.27	-0.202	0.0291543
ENSMUSG00000040481	Bptf	421.86	439.91	383.15	379.8	388.73	371.36	368.9	375.69	-0.2	0.0408698
ENSMUSG00000033307	Mif	813.66	810.76	727.03	759.24	661.55	729.13	754.35	745.54	-0.196	0.0182501
ENSMUSG00000031996	Aplp2	672.72	707.36	659.69	693.67	673.69	591.38	682.31	636.26	-0.171	0.0459434
ENSMUSG00000046402	Rbp1	1992.93	2345.68	2500.11	2350.45	2197.22	2116.48	2261.41	2240.63	-0.165	0.0497373
ENSMUSG00000024074	Crim1	870.56	964.21	934.63	947.35	1100.91	1146.03	1122.84	1045.58	0.16	0.03615
ENSMUSG00000064351	mt-Co1	1549.09	1758.53	1772.68	1596.94	2116.88	2021.72	1884.64	1964.7	0.171	0.0388833
ENSMUSG00000020585	Laptm4a	761.29	768.01	854.88	823.02	953.2	952.45	1015.6	935.57	0.178	0.0211934
ENSMUSG00000021242	Npc2	663.02	589.71	626.83	556.44	706.74	773.94	742.76	715.57	0.189	0.0395591
ENSMUSG00000038633	Degs1	341.69	350.39	361.91	321.04	425.13	418.01	394.57	428.32	0.189	0.0404406
ENSMUSG00000030654	Arl6ip1	2748.08	2809.7	2673.65	2739.21	3270.52	3519.27	3216.98	3340.66	0.194	0.00273179
ENSMUSG00000019370	Calm3	642.65	700.05	736.24	782.89	823.07	862.46	864.49	930.82	0.201	0.0201955
ENSMUSG00000026229	Psmd1	203.33	223.24	215.62	207.46	253.16	259.69	269.12	259.11	0.205	0.0403751
ENSMUSG00000028173	Wls	199.78	215.93	211.21	210.32	241.86	251.61	264.15	278.48	0.219	0.0320603
ENSMUSG00000024038	Ndufv3	392.44	359.89	366.32	379.8	441.87	433.07	503.46	483.5	0.223	0.0185941
ENSMUSG00000052707	Tnrc6a	190.4	232.01	232.06	224.65	282.86	264.47	275.74	271.54	0.225	0.0411566
ENSMUSG00000007891	Ctsd	2601.97	2260.18	2146.61	1937.33	2585.95	2685.46	2806.68	2791.37	0.228	0.0153999
ENSMUSG00000005533	Igf1r	377.25	448.31	470.52	423.51	552.76	508	582.53	500.31	0.23	0.0274674
ENSMUSG00000033161	Atp1a1	1148.89	941.56	1028.02	1053.76	1146.1	1354.67	1293	1388.01	0.232	0.0174265
ENSMUSG00000029552	Tes	270.57	290.84	272.94	270.88	345.63	361.44	362.27	299.31	0.235	0.0273113
ENSMUSG00000028780	Sema3c	263.14	239.68	240.87	250.81	312.99	297.16	334.53	306.25	0.24	0.0171538
ENSMUSG00000045763	Basp1	1131.11	1213.03	1229.21	1237.57	1589.65	1484.7	1484.7	1487.42	0.242	0.00024522
ENSMUSG00000028820	Sfpq	220.47	253.57	242.48	245.44	286.63	298.63	307.21	317.22	0.243	0.0115839
ENSMUSG00000057230	Aak1	182.97	165.88	161.52	156.94	231.82	211.21	190.04	210.5	0.248	0.0492526
ENSMUSG00000047496	Rnf152	359.15	318.24	317.02	345.04	395.01	445.56	413.2	443.3	0.251	0.0099241
ENSMUSG00000022708	Zbtb20	670.13	752.66	735.84	738.46	908.43	931.88	945.22	887.33	0.254	0.000164108
ENSMUSG00000002985	Apoe	4384.13	3908.73	3644.35	3992.9	4678.15	5153.1	5133.92	5070.37	0.256	0.00144504
ENSMUSG00000045983	Eif4g1	311.95	294.12	277.75	275.17	320.11	366.95	411.96	373.86	0.258	0.0205992
ENSMUSG00000023951	Vegfa	137.71	155.65	155.51	131.14	197.92	192.11	179.69	167.01	0.258	0.0468864
ENSMUSG00000033295	Ptprf	177.15	156.74	182.76	178.43	224.28	185.5	221.09	248.15	0.26	0.045937
ENSMUSG00000026830	Ermn	522.4	469.14	440.46	500.19	662.39	605.71	601.58	601.91	0.265	0.00458227
ENSMUSG00000028248	Pnisr	297.4	289.37	248.89	263.35	357.35	355.56	335.77	357.78	0.265	0.00921854
ENSMUSG00000024140	Epas1	219.17	276.95	264.12	243.29	340.61	327.28	269.53	333.3	0.27	0.0279469
ENSMUSG00000013622	Atraid	141.27	111.07	135.07	116.81	155.66	161.25	164.78	165.19	0.27	0.0467151
ENSMUSG00000031517	Gpm6a	305.16	306.91	313.82	302.05	390.82	408.09	374.69	401.64	0.271	0.00102246
ENSMUSG00000024026	Glo1	300.96	281.7	268.93	276.61	375.76	347.48	375.52	355.23	0.275	0.00302586
ENSMUSG00000049044	Rapgef4	125.75	147.98	138.67	155.14	173.23	167.5	191.69	197.71	0.275	0.0303659
ENSMUSG00000019970	Sgk1	419.6	473.52	467.32	468.3	546.9	519.75	660.78	631.51	0.276	0.00559039
ENSMUSG00000052397	Ezr	783.92	757.41	742.66	716.24	943.58	871.64	1027.61	1018.53	0.277	0.000281565
ENSMUSG00000027447	Cst3	3691.7	7025.35	7328.38	6542.21	8703.11	8218.36	8834.89	8541.13	0.279	0.0371337
ENSMUSG00000019960	Dusp6	216.91	254.66	263.32	278.4	293.74	328.01	347.37	345.72	0.282	0.0122218
ENSMUSG00000013033	Adgrl1	122.84	166.97	143.08	129.7	159.43	192.84	176.79	187.11	0.282	0.0445672
ENSMUSG00000072704	Smim10l1	98.27	103.4	109.82	120.03	150.22	133.7	138.28	136.68	0.284	0.0359233
ENSMUSG00000021248	Tmed10	120.25	108.15	116.63	122.9	143.94	151.33	160.64	151.3	0.285	0.0207381
ENSMUSG00000041329	Atp1b2	599.98	635.74	700.98	690.8	805.91	852.18	888.91	858.1	0.286	0.000111746
ENSMUSG00000022949	Clic6	354.3	373.04	381.95	391.98	489.57	466.13	499.73	491.18	0.286	0.000222732
ENSMUSG00000036438	Calm2	339.75	381.45	431.25	351.13	515.94	467.6	446.32	497.75	0.286	0.00500079
ENSMUSG00000032009	Sesn3	201.72	227.63	249.29	212.47	305.88	280.26	266.63	301.14	0.287	0.00796136
ENSMUSG00000025666	Tmem47	104.09	104.13	102.6	116.09	137.67	127.46	142.01	147.28	0.287	0.0274025
ENSMUSG00000052331	Ankrd44	109.59	111.8	108.61	101.04	128.04	143.62	143.67	144.36	0.288	0.0209939
ENSMUSG00000025915	Sgk3	106.35	100.84	96.19	94.95	123.44	113.5	142.84	139.24	0.29	0.0429346
ENSMUSG00000025016	Tm9sf3	125.1	173.92	184.36	144.04	193.32	205.33	226.47	198.44	0.29	0.0478186
ENSMUSG00000035183	Slc24a5	232.1	249.55	226.04	234.69	312.16	303.04	279.47	332.93	0.293	0.00285847
ENSMUSG00000028613	Lrp8	155.81	152.36	141.88	163.03	192.06	195.05	219.85	194.06	0.294	0.00972896
ENSMUSG00000030122	Ptms	184.26	179.76	173.14	169.48	232.23	229.57	227.71	234.26	0.296	0.00218928
ENSMUSG00000001794	Capns1	208.83	192.18	179.55	217.85	266.55	261.9	272.43	244.49	0.297	0.00785298
ENSMUSG00000032388	Spg21	303.22	344.91	375.54	306.71	425.13	438.58	440.94	422.47	0.298	0.00150092
ENSMUSG00000001847	Rac1	196.55	185.24	210.81	225.73	242.28	287.61	264.56	278.84	0.303	0.00679808
ENSMUSG00000031229	Atrx	319.71	253.93	247.29	277.68	377.43	365.48	329.98	341.34	0.303	0.010553
ENSMUSG00000036503	Rnf13	125.1	154.92	174.34	132.93	208.38	169.33	209.5	175.05	0.303	0.0470018
ENSMUSG00000006740	Kif5b	251.18	216.66	212.42	237.91	322.2	262.63	298.51	323.43	0.304	0.00986275
ENSMUSG00000027239	Mdk	103.12	118.38	121.04	127.2	145.62	167.86	152.78	149.47	0.304	0.0190555
ENSMUSG00000029405	G3bp2	121.22	170.26	167.53	152.99	220.1	192.11	199.15	206.48	0.304	0.0217828
ENSMUSG00000021848	Otx2	895.77	849.49	954.67	831.61	1240.25	1144.56	1162.58	1089.43	0.305	7.2178e-05
ENSMUSG00000050732	Vamp8	224.35	203.15	180.75	232.18	274.5	250.14	293.13	299.68	0.308	0.011551
ENSMUSG00000027797	Dclk1	87.61	93.9	90.18	107.49	126.37	119.01	142.84	111.83	0.309	0.0441783
ENSMUSG00000027010	Slc25a12	115.73	99.38	99.4	109.64	165.7	142.89	120.48	137.05	0.309	0.0479105
ENSMUSG00000017760	Ctsa	94.39	78.92	88.97	75.6	119.67	108.36	106.4	111.83	0.311	0.0390691
ENSMUSG00000031548	Sfrp1	413.46	487.77	428.84	451.82	572.42	600.93	601.99	588.39	0.319	3.83173e-05
ENSMUSG00000016534	Lamp2	186.52	211.18	250.49	239.34	258.18	289.08	327.49	306.25	0.319	0.0120192
ENSMUSG00000022477	Aco2	142.24	173.92	167.93	187.03	226.79	213.41	227.3	228.78	0.321	0.00493638
ENSMUSG00000009575	Cbx5	210.12	197.67	189.97	160.88	241.86	251.98	288.99	232.43	0.321	0.0118944
ENSMUSG00000028167	Bdh2	77.26	76.36	77.75	96.38	97.91	121.95	109.72	103.42	0.323	0.046825
ENSMUSG00000069601	Ank3	88.57	78.92	82.96	89.58	105.03	101.01	140.35	116.22	0.324	0.045475
ENSMUSG00000049313	Sorl1	145.15	150.53	145.08	142.25	202.11	199.82	195.42	180.17	0.326	0.00222528
ENSMUSG00000052459	Atp6v1a	467.12	497.27	569.12	463.64	658.62	690.92	664.51	621.64	0.33	0.00011047
ENSMUSG00000026032	Ndufb3	139.65	262.7	253.3	280.19	364.04	322.87	302.65	352.67	0.33	0.0433164
ENSMUSG00000035158	Mitf	106.35	100.11	102.2	106.77	102.52	146.93	135.8	157.15	0.334	0.0297343
ENSMUSG00000032525	Nktr	297.08	261.97	255.3	294.52	380.78	378.7	366	364.73	0.335	0.000467178
ENSMUSG00000000567	Sox9	470.35	487.4	433.65	471.16	529.33	644.64	668.65	631.15	0.336	0.000167291
ENSMUSG00000000247	Lhx2	57.54	66.5	62.92	62.34	88.29	77.14	93.16	76.75	0.338	0.0396344
ENSMUSG00000067336	Bmpr2	77.26	77.82	80.56	72.38	100.84	100.28	108.47	104.89	0.339	0.0114821
ENSMUSG00000063382	Bcl9l	93.42	88.05	98.99	107.49	109.63	135.91	127.52	148.74	0.34	0.0233897
ENSMUSG00000022512	Cldn1	232.1	245.16	227.65	308.5	292.49	319.2	366.83	342.43	0.342	0.00545728
ENSMUSG00000041028	Ghitm	165.19	245.89	278.55	239.34	321.36	332.79	347.37	302.6	0.342	0.0110543
ENSMUSG00000030102	Itpr1	161.31	147.24	161.52	158.73	218.01	233.61	208.25	189.31	0.345	0.00279872
ENSMUSG00000026864	Hspa5	579.62	575.46	574.73	568.26	775.37	754.1	760.98	817.9	0.346	2.16086e-08
ENSMUSG00000040415	Dtx3	91.81	84.77	77.75	101.04	122.6	120.48	136.21	101.23	0.346	0.0356717
ENSMUSG00000027602	Map1lc3a	246.98	241.14	228.05	257.26	350.65	331.32	321.28	316.12	0.348	0.000189134
ENSMUSG00000008575	Nfib	239.54	278.05	307.8	303.84	415.93	352.26	412.37	353.4	0.348	0.00253454
ENSMUSG00000052837	Junb	129.95	156.74	147.09	157.65	166.96	206.8	211.15	209.77	0.348	0.00495001
ENSMUSG00000032580	Rbm5	77.26	69.06	70.14	79.54	79.5	105.05	116.34	97.58	0.348	0.0438951
ENSMUSG00000039691	Tspan10	242.77	242.97	195.98	232.54	292.91	304.51	349.02	307.72	0.349	0.00150092
ENSMUSG00000020821	Kif1c	76.94	60.65	83.76	86.71	94.15	116.81	110.13	102.69	0.349	0.0417923
ENSMUSG00000030168	Adipor2	192.67	195.47	171.94	179.87	205.87	277.32	262.91	246.68	0.35	0.00329964
ENSMUSG00000038712	Mindy1	68.53	66.5	66.13	82.41	110.05	98.81	93.16	82.96	0.35	0.0446581
ENSMUSG00000060802	B2m	321.97	365.74	355.5	395.21	487.48	480.08	503.87	474.37	0.351	4.62101e-05
ENSMUSG00000025060	Slk	197.19	215.57	208.81	212.11	288.72	297.89	263.73	279.58	0.351	0.000152218
ENSMUSG00000023967	Mrps18a	60.13	52.98	59.72	46.22	78.25	69.42	78.25	71.63	0.351	0.0495928
ENSMUSG00000031432	Prps1	65.95	80.02	75.75	69.15	103.77	95.14	99.37	96.85	0.355	0.0128052
ENSMUSG00000041794	Myrip	155.49	114	123.04	125.05	166.54	144.36	195.01	183.09	0.355	0.0211812
ENSMUSG00000021484	Lman2	84.7	76	82.96	90.65	102.94	127.83	127.93	93.92	0.355	0.0356993
ENSMUSG00000095687	Rnaset2a	62.39	119.84	104.61	104.62	144.36	140.68	126.69	150.93	0.358	0.041893
ENSMUSG00000025321	Itgb8	691.14	751.57	797.57	674.32	1013.88	977.43	965.09	1013.05	0.359	1.81097e-07
ENSMUSG00000036098	Myrf	171.01	251.01	278.95	253.68	291.65	355.2	364.76	343.9	0.36	0.00840242
ENSMUSG00000025352	Gdf11	98.27	84.77	87.37	88.14	111.72	130.77	126.28	122.06	0.362	0.00685617
ENSMUSG00000032366	Tpm1	76.29	73.44	77.35	69.15	94.15	101.01	99.78	110.37	0.364	0.00831041
ENSMUSG00000045973	Slc25a51	118.96	103.77	100.2	99.25	98.33	156.48	162.71	140.7	0.366	0.031029
ENSMUSG00000026576	Atp1b1	782.95	772.76	787.55	734.87	1096.31	1025.92	1061.56	1038.63	0.367	1.67265e-09
ENSMUSG00000032383	Ppib	69.83	78.92	67.33	88.86	94.57	105.05	109.72	107.81	0.368	0.0173728
ENSMUSG00000032988	Slc16a8	658.17	680.32	713.4	596.21	824.32	941.8	967.58	908.53	0.37	1.71011e-06
ENSMUSG00000002332	Dhrs1	173.27	161.49	163.52	191.33	247.3	243.16	218.19	239.74	0.37	0.0005501
ENSMUSG00000024048	Myl12a	57.86	75.63	80.56	70.23	87.45	86.32	100.61	115.12	0.37	0.0359943
ENSMUSG00000034708	Grn	81.46	77.46	64.53	72.73	101.26	103.58	105.99	97.94	0.371	0.0109368
ENSMUSG00000086040	Wipf3	188.46	209.72	182.36	199.93	253.99	281.37	252.56	286.15	0.372	0.000148778
ENSMUSG00000031232	Magt1	139.97	106.32	103.8	116.81	150.22	142.89	171.82	164.46	0.372	0.00965585
ENSMUSG00000039157	Fam102a	78.88	72.71	67.33	60.91	112.56	102.11	90.67	80.4	0.372	0.0417742
ENSMUSG00000026034	Clk1	93.1	108.15	67.73	79.9	108.79	132.97	130.83	109.64	0.372	0.0423366
ENSMUSG00000025241	Fyco1	140.94	158.94	157.51	150.84	203.36	206.8	217.36	210.14	0.374	0.000117987
ENSMUSG00000021939	Ctsb	294.82	360.99	360.31	324.98	510.08	422.05	465.36	452.07	0.374	0.000152218
ENSMUSG00000073664	Nbeal1	105.71	116.55	116.63	107.49	166.54	153.17	115.93	162.63	0.374	0.00770708
ENSMUSG00000003949	Hlf	122.84	112.9	147.89	112.15	177	163.82	172.23	160.07	0.375	0.00352636
ENSMUSG00000042444	Mindy2	137.06	169.17	158.31	169.83	187.88	219.29	262.91	218.18	0.375	0.00403806
ENSMUSG00000039105	Atp6v1g1	66.59	82.21	108.61	76.32	120.51	101.38	94.81	124.62	0.375	0.0456509
ENSMUSG00000058056	Palld	85.34	87.69	99.8	99.97	147.71	113.13	134.56	121.33	0.379	0.00972896
ENSMUSG00000024664	Fads3	67.24	81.11	80.96	71.66	104.61	109.46	95.23	105.98	0.38	0.00732855
ENSMUSG00000028565	Nfia	189.43	238.95	209.61	212.83	269.47	303.77	279.05	324.89	0.381	0.000310619
ENSMUSG00000090000	Ier3ip1	103.45	123.13	137.87	116.09	166.54	149.5	171.82	176.88	0.382	0.00252816
ENSMUSG00000066456	Hmgn3	50.11	42.38	54.91	53.03	66.95	70.16	75.77	65.05	0.382	0.03279
ENSMUSG00000031441	Atp11a	88.57	78.92	95.39	86.71	134.74	103.58	137.46	109.64	0.383	0.0152253
ENSMUSG00000036712	Cyld	60.45	67.96	82.16	63.78	84.94	100.28	89.43	102.33	0.384	0.0185925
ENSMUSG00000003534	Ddr1	63.68	76.36	59.72	75.6	76.16	85.22	113.86	107.08	0.384	0.0445988
ENSMUSG00000037815	Ctnna1	177.8	213.74	179.95	187.03	248.97	277.32	266.22	261.3	0.388	8.91202e-05
ENSMUSG00000028962	Slc4a2	190.08	165.15	183.96	175.93	223.03	254.18	258.35	260.21	0.388	0.000128507
ENSMUSG00000075254	Heg1	52.05	63.57	54.51	64.85	85.36	78.97	90.26	72.73	0.388	0.0239278
ENSMUSG00000043079	Synpo	45.58	54.81	44.89	50.52	73.23	70.52	63.35	65.42	0.388	0.0274492
ENSMUSG00000005142	Man2b1	69.83	54.44	56.91	62.34	63.18	87.79	92.33	91.36	0.388	0.0420876
ENSMUSG00000015401	Tmem27	262.49	306.55	280.55	284.85	414.25	360.71	418.58	385.92	0.389	1.84014e-05
ENSMUSG00000036667	Tcaf1	39.76	47.86	48.5	41.92	66.53	66.48	54.65	59.57	0.389	0.0397063
ENSMUSG00000031604	Msmo1	116.7	116.55	119.84	121.46	159.84	181.09	168.51	151.67	0.39	0.000710603
ENSMUSG00000063450	Syne2	342.99	263.07	283.36	253.32	386.64	413.97	379.25	363.63	0.394	0.000336703
ENSMUSG00000037822	Smim14	134.16	179.4	205.6	184.17	282.45	254.55	215.71	251.8	0.395	0.00530116
ENSMUSG00000030647	Ndufc2	198.16	192.18	196.39	175.93	263.2	279.9	269.94	254.36	0.396	2.31802e-05
ENSMUSG00000029407	Uso1	49.78	61.75	63.73	54.1	77.83	82.28	82.39	77.48	0.396	0.0130239
ENSMUSG00000001627	Ifrd1	66.92	77.09	54.51	54.1	82.43	92.2	93.98	82.59	0.396	0.0277723
ENSMUSG00000070733	Fryl	145.47	252.84	248.49	220.35	348.98	336.83	288.16	304.43	0.4	0.00597744
ENSMUSG00000020423	Btg2	60.77	69.06	70.14	61.99	97.08	92.93	79.91	97.21	0.401	0.00785298
ENSMUSG00000026131	Dst	111.2	104.5	121.44	111.07	155.66	148.03	170.58	156.05	0.403	0.000461421
ENSMUSG00000052040	Klf13	73.7	55.9	61.72	56.61	92.48	76.03	85.29	92.46	0.403	0.0203189
ENSMUSG00000022108	Itm2b	182.32	222.51	292.97	228.24	323.87	283.57	313.83	344.26	0.404	0.00202842
ENSMUSG00000034574	Daam1	69.83	63.94	74.95	75.24	104.19	89.26	101.85	104.89	0.405	0.00472248
ENSMUSG00000027540	Ptpn1	58.83	67.59	68.53	50.52	94.15	89.63	74.94	86.61	0.407	0.0184332
ENSMUSG00000002265	Peg3	118.96	126.78	121.04	118.6	177.42	170.44	186.73	139.24	0.408	0.00115041
ENSMUSG00000024197	Plin3	85.34	80.02	78.55	75.24	105.87	108.73	118.83	117.68	0.408	0.00157494
ENSMUSG00000022747	St3gal6	84.7	103.4	119.84	98.53	126.79	134.44	143.67	164.82	0.408	0.00555153
ENSMUSG00000075701	Selenos	157.11	149.8	126.65	153.71	218.84	206.07	215.29	196.25	0.409	0.000303621
ENSMUSG00000010663	Fads1	128.98	116.92	133.46	134.36	169.47	190.27	214.47	146.18	0.409	0.00408286
ENSMUSG00000039156	Stim2	122.19	124.59	108.21	102.47	144.78	173.74	175.55	153.13	0.41	0.00148387
ENSMUSG00000033676	Gabrb3	58.83	62.48	68.13	73.45	107.96	87.05	89.02	88.44	0.41	0.011204
ENSMUSG00000055839	Elob	226.93	266.36	284.96	264.43	405.89	358.5	362.69	347.19	0.413	3.71062e-05
ENSMUSG00000039262	Prrc2b	121.22	150.17	152.7	146.19	211.31	186.6	198.73	212.33	0.414	0.000225557
ENSMUSG00000005506	Celf1	104.09	148.34	119.43	122.9	175.74	155.01	166.44	192.6	0.414	0.00240161
ENSMUSG00000038486	Sv2a	115.08	101.57	119.03	101.76	151.47	160.52	173.48	134.49	0.415	0.00184375
ENSMUSG00000001827	Folr1	42.67	37.63	51.3	46.22	71.55	61.34	57.55	61.4	0.415	0.0330514
ENSMUSG00000030495	Slc7a10	78.23	94.27	94.18	100.32	150.22	133.7	120.07	117.68	0.416	0.00500079
ENSMUSG00000026223	Itm2c	93.42	177.57	193.58	164.82	250.23	236.55	204.53	262.76	0.416	0.013415
ENSMUSG00000007038	Neu1	53.66	62.11	68.94	59.84	102.52	85.95	87.36	66.51	0.416	0.0283018
ENSMUSG00000021756	Il6st	65.3	105.23	82.16	85.99	133.9	102.85	108.47	131.2	0.417	0.0214566
ENSMUSG00000000253	Gmpr	102.48	120.94	107.81	101.04	140.6	162.72	158.99	151.3	0.418	0.000437166
ENSMUSG00000038855	Itpkb	67.56	44.21	58.51	77.39	94.15	91.09	79.08	95.75	0.418	0.0378518
ENSMUSG00000061313	Ddhd2	48.17	60.65	45.29	44.07	61.09	69.06	65.42	89.9	0.418	0.0451035
ENSMUSG00000025917	Cops5	56.25	58.82	70.94	66.64	91.64	101.75	80.32	84.42	0.419	0.0111903
ENSMUSG00000028195	Cyr61	91.81	121.3	121.04	88.86	185.79	126.36	147.39	152.76	0.419	0.0138841
ENSMUSG00000043088	Il17re	111.2	130.44	115.43	118.24	167.38	139.21	172.23	191.87	0.42	0.00109878
ENSMUSG00000027984	Hadh	72.41	90.61	96.99	103.91	104.61	132.97	144.08	136.32	0.42	0.0093242
ENSMUSG00000061244	Exoc5	52.37	65.77	67.73	45.86	83.27	95.14	65.83	84.06	0.42	0.0390146
ENSMUSG00000022892	App	412.49	562.67	616.81	510.94	833.53	772.47	758.49	681.21	0.421	0.000184678
ENSMUSG00000024639	Gnaq	57.86	58.46	58.51	59.84	81.6	94.03	81.15	77.48	0.422	0.00572368
ENSMUSG00000038615	Nfe2l1	164.87	152.36	139.47	130.78	198.34	223.33	214.88	200.64	0.425	0.000201842
ENSMUSG00000022462	Slc38a2	55.6	65.4	65.33	74.53	59.84	91.83	104.75	101.6	0.426	0.031037
ENSMUSG00000055447	Cd47	70.47	64.31	60.52	50.88	96.66	96.24	71.63	87.34	0.427	0.0205992
ENSMUSG00000029199	Lias	42.02	39.83	40.88	40.49	61.93	60.24	64.17	44.22	0.428	0.0372264
ENSMUSG00000107722	2900060B14Rik	272.51	208.99	137.07	164.82	262.78	263.73	291.89	251.8	0.431	0.012401
ENSMUSG00000028127	Abcd3	139.65	160.03	165.93	143.32	265.29	209.37	199.56	220.37	0.433	0.000310975
ENSMUSG00000045287	Rtn4rl1	38.79	43.48	50.5	41.2	61.09	65.38	72.87	46.05	0.434	0.0458541
ENSMUSG00000015733	Capza2	42.35	48.23	46.89	43	74.9	55.1	66.24	63.59	0.436	0.018089
ENSMUSG00000020777	Acox1	60.77	63.94	74.95	89.58	88.71	114.97	81.15	123.52	0.436	0.0353968
ENSMUSG00000038366	Lasp1	108.62	155.28	161.52	154.43	210.89	176.31	244.28	220.37	0.437	0.00257975
ENSMUSG00000032449	Slc25a36	39.44	40.56	34.07	42.64	52.3	58.4	59.62	55.92	0.438	0.0180592
ENSMUSG00000012609	Ttll5	107	99.38	105.01	96.02	130.13	157.58	149.46	150.2	0.439	0.000237962
ENSMUSG00000092341	Malat1	13774	13640.8	13097.7	14902.1	20911.9	20227.1	18660.5	20183.2	0.44	8.29472e-11
ENSMUSG00000022365	Derl1	43.32	50.79	50.1	56.61	67.79	76.77	71.63	73.09	0.44	0.00793257
ENSMUSG00000030450	Oca2	39.76	57.36	48.09	50.88	71.97	56.2	90.26	69.07	0.44	0.0419393
ENSMUSG00000026466	Tor1aip1	35.24	73.07	66.13	51.24	87.04	73.83	85.29	90.63	0.44	0.0483516
ENSMUSG00000022199	Slc22a17	220.14	241.14	242.48	233.97	346.47	315.53	362.69	328.91	0.441	3.53284e-07
ENSMUSG00000038375	Trp53inp2	88.9	126.05	125.85	108.92	148.13	157.58	158.99	194.42	0.441	0.00242959
ENSMUSG00000036053	Fmnl2	60.77	46.77	43.28	53.75	79.08	63.91	76.59	76.75	0.442	0.0195136
ENSMUSG00000050565	Tor1aip2	48.49	78.55	80.96	64.49	113.4	84.12	110.54	93.92	0.442	0.0262228
ENSMUSG00000030246	Ldhb	157.11	154.55	172.74	155.5	206.29	240.23	240.13	238.64	0.445	5.87617e-06
ENSMUSG00000023921	Mut	84.05	70.15	71.74	79.18	121.35	108.73	102.26	110.73	0.446	0.00155379
ENSMUSG00000041625	Ggact	37.5	38.73	38.07	48.73	52.3	58.04	53.82	72.36	0.447	0.032558
ENSMUSG00000032231	Anxa2	69.5	49.33	52.9	59.48	83.27	66.85	88.19	96.48	0.449	0.0213128
ENSMUSG00000029068	Ccnl2	61.42	52.98	57.31	55.54	81.18	90.36	84.05	75.28	0.451	0.00364604
ENSMUSG00000024006	Stk38	77.91	72.34	62.12	74.88	115.49	119.38	96.88	78.21	0.452	0.0129499
ENSMUSG00000020220	Vps13d	28.12	28.86	25.25	29.38	36.4	40.4	43.47	42.39	0.452	0.0373453
ENSMUSG00000059714	Flot1	28.12	34.71	42.48	40.85	43.52	49.96	60.03	58.47	0.452	0.0481997
ENSMUSG00000055430	Nap1l5	65.95	65.04	77.35	52.31	77.41	109.83	90.67	100.5	0.453	0.0125979
ENSMUSG00000028249	Sdcbp	211.42	264.16	284.16	253.68	393.75	370.99	382.56	345.72	0.457	7.70488e-06
ENSMUSG00000028393	Alad	123.16	138.11	148.69	151.56	224.7	181.09	204.94	208.31	0.457	7.71809e-05
ENSMUSG00000027523	Gnas	403.76	486.67	474.93	519.89	699.21	699.74	731.58	647.23	0.458	1.09964e-07
ENSMUSG00000067158	Col4a4	257.64	249.18	238.87	182.37	353.16	339.4	327.49	374.59	0.458	2.66415e-05
ENSMUSG00000050931	Sgms2	36.53	41.29	50.5	41.56	61.09	71.26	59.21	55.92	0.46	0.0182659
ENSMUSG00000038127	Ccdc50	38.15	28.5	32.46	45.5	50.21	55.1	49.27	55.18	0.463	0.0388596
ENSMUSG00000038650	Rnh1	67.24	55.9	63.73	54.46	95.82	88.52	86.53	84.06	0.465	0.00234121
ENSMUSG00000032293	Ireb2	37.18	39.83	54.51	39.41	54.4	87.42	58.38	59.2	0.466	0.0477311
ENSMUSG00000016427	Ndufa1	59.8	143.96	174.74	125.76	187.46	214.88	180.52	206.85	0.467	0.0264432
ENSMUSG00000004651	Tyr	130.92	145.42	139.07	136.87	223.03	198.72	199.15	191.5	0.468	5.54161e-06
ENSMUSG00000000184	Ccnd2	179.41	169.53	148.69	199.93	240.18	269.61	272.01	249.97	0.469	3.44537e-05
ENSMUSG00000040913	Fbxw4	62.07	71.25	81.76	87.78	98.75	108.73	118	119.5	0.469	0.00224956
ENSMUSG00000029776	Hibadh	45.58	89.52	80.16	65.93	113.82	92.93	92.74	128.64	0.47	0.0303659
ENSMUSG00000020611	Gna13	29.74	40.92	35.27	25.44	54.4	44.45	43.89	50.43	0.47	0.0441783
ENSMUSG00000020300	Cpeb4	111.85	118.38	124.64	105.7	159.84	160.52	186.73	171.4	0.471	2.3211e-05
ENSMUSG00000037197	Rbm17	42.67	50.06	51.3	50.88	58.16	74.93	75.35	78.21	0.471	0.00685617
ENSMUSG00000022607	Ptk2	29.74	45.31	44.89	48.37	56.91	61.34	55.89	78.94	0.472	0.0371461
ENSMUSG00000025351	Cd63	1087.14	1188.19	1229.61	1273.76	1663.71	1797.65	1771.62	1820.71	0.473	1.98751e-13
ENSMUSG00000053931	Cnn3	217.56	214.11	239.67	233.61	318.85	324.71	349.85	341.7	0.473	1.74534e-08
ENSMUSG00000021186	Fbln5	73.06	82.94	75.35	83.13	117.16	109.46	119.24	118.41	0.473	0.000131653
ENSMUSG00000021226	Acot2	51.4	33.61	32.06	47.65	61.93	62.81	55.07	61.76	0.473	0.038266
ENSMUSG00000029512	Ulk1	37.82	33.98	36.07	36.55	51.05	54.73	65.42	43.12	0.474	0.0273348
ENSMUSG00000052062	Pard3b	41.05	32.15	28.06	40.13	44.77	44.81	57.96	62.49	0.474	0.0471524
ENSMUSG00000026385	Dbi	539.53	498.73	502.99	574	796.29	842.26	739.45	750.29	0.475	2.93664e-09
ENSMUSG00000020743	Mif4gd	93.1	100.84	103.4	92.44	126.79	157.21	130.42	161.17	0.477	0.000222136
ENSMUSG00000029238	Clock	63.36	76.73	60.12	73.09	112.56	99.18	90.26	102.69	0.477	0.00162885
ENSMUSG00000028631	Kcnq4	81.14	72.34	62.12	70.94	89.13	123.42	102.68	109.64	0.477	0.00301133
ENSMUSG00000006777	Krt23	31.36	30.33	26.45	21.5	43.52	43.34	40.16	35.81	0.478	0.0477311
ENSMUSG00000024781	Lipa	72.41	66.5	70.14	72.38	97.5	114.24	111.37	94.65	0.48	0.000558077
ENSMUSG00000026821	Ralgds	28.77	33.98	25.25	26.51	47.28	45.18	34.78	42.76	0.48	0.0405334
ENSMUSG00000019947	Arid5b	42.67	44.94	25.65	51.24	74.9	63.91	65	52.26	0.482	0.0476095
ENSMUSG00000021127	Zfp36l1	98.6	109.25	128.25	111.07	175.33	147.29	174.72	166.28	0.483	7.67035e-05
ENSMUSG00000037058	Paip2	68.53	88.05	110.22	87.43	138.08	110.56	139.53	131.93	0.483	0.00276255
ENSMUSG00000028556	Dock7	63.68	86.96	67.33	65.57	102.1	120.85	93.16	99.04	0.483	0.00299748
ENSMUSG00000023088	Abcc1	58.51	61.75	64.13	50.16	79.5	102.11	73.7	92.46	0.483	0.00513708
ENSMUSG00000029153	Ociad2	341.05	384.37	381.95	374.07	540.62	558.69	540.72	563.9	0.486	3.31715e-12
ENSMUSG00000028382	Ptbp3	29.42	32.52	29.66	31.17	56.49	38.2	41.82	47.88	0.486	0.0320347
ENSMUSG00000028583	Pdpn	604.83	566.69	498.18	508.79	804.24	832.71	766.36	810.59	0.487	8.66735e-10
ENSMUSG00000028367	Txn1	29.74	42.02	57.71	40.85	61.93	63.91	67.07	52.99	0.487	0.0359623
ENSMUSG00000033557	Fam20b	26.18	25.58	26.45	22.57	39.75	28.28	40.99	41.3	0.487	0.0496295
ENSMUSG00000022974	Paxbp1	42.02	28.5	32.46	51.24	56.07	57.3	57.14	53.72	0.488	0.0383031
ENSMUSG00000031207	Msn	102.8	123.13	91.78	118.6	132.65	178.52	175.96	162.26	0.489	0.000646941
ENSMUSG00000074582	Arfgef2	74.67	93.17	90.58	108.56	147.29	145.09	128.35	122.43	0.491	0.000974946
ENSMUSG00000049382	Krt8	58.83	51.52	58.51	46.94	77.41	83.75	86.53	75.28	0.492	0.00190978
ENSMUSG00000039081	Zfp503	26.18	48.59	40.88	45.86	56.91	65.38	62.52	65.42	0.492	0.0221751
ENSMUSG00000028273	Pdlim5	65.95	63.94	56.91	46.94	92.48	73.83	82.81	101.6	0.494	0.00609699
ENSMUSG00000034168	Irf2bpl	62.39	65.04	69.34	79.54	100.43	121.95	101.44	92.1	0.496	0.00163551
ENSMUSG00000038612	Mcl1	59.48	107.42	86.57	60.19	108.38	116.81	110.96	104.89	0.497	0.0093242
ENSMUSG00000022037	Clu	4698.67	4533.88	4207.86	4493.44	6560.7	6624.2	7024.36	6731.75	0.498	6.80853e-17
ENSMUSG00000041617	Ccdc74a	31.36	29.96	35.27	30.46	36.82	47.38	51.34	55.18	0.499	0.0222299
ENSMUSG00000042032	Mat2b	30.71	27.77	32.06	27.95	51.89	39.67	52.58	33.62	0.499	0.0456509
ENSMUSG00000044502	Bod1	134.8	166.24	156.31	157.65	266.13	228.47	233.92	181.27	0.501	0.000101925
ENSMUSG00000025949	Pikfyve	23.28	31.79	27.25	23.65	34.73	39.3	48.44	36.91	0.501	0.0396814
ENSMUSG00000000594	Gm2a	135.77	99.38	125.05	123.26	198.76	185.13	184.24	172.13	0.502	5.88869e-05
ENSMUSG00000055653	Gpc3	186.85	212.65	244.48	223.22	340.19	322.5	314.25	331.11	0.503	1.81097e-07
ENSMUSG00000051855	Mest	56.89	81.48	90.18	74.88	125.53	102.11	99.37	135.95	0.504	0.00464817
ENSMUSG00000040616	Tmem51	64.01	54.44	52.1	49.09	72.39	105.79	64.17	93.56	0.504	0.0162612
ENSMUSG00000006651	Aplp1	54.31	59.19	46.89	60.91	95.82	79.34	75.77	83.69	0.505	0.00233476
ENSMUSG00000026473	Glul	1038.98	1172.84	1245.64	1196.36	1790.08	1682.68	1818.81	1758.59	0.506	1.25804e-14
ENSMUSG00000000759	Tubgcp3	26.18	29.96	30.06	27.23	33.89	38.57	45.13	56.28	0.506	0.0395301
ENSMUSG00000033880	Lgals3bp	75.97	76	84.97	83.48	112.56	110.56	148.64	121.7	0.507	0.000284228
ENSMUSG00000032554	Trf	4590.38	5103.13	5006.63	5114.02	7291.3	7352.23	7629.66	7702.4	0.509	4.05507e-21
ENSMUSG00000030536	Iqgap1	149.03	135.55	141.88	134.36	191.23	209.37	212.81	235.72	0.509	7.76761e-07
ENSMUSG00000045410	Akr1e1	52.05	54.81	52.9	40.13	67.37	73.1	86.95	75.28	0.509	0.003439
ENSMUSG00000020152	Actr2	33.3	48.59	44.89	49.09	65.69	59.14	71.63	71.63	0.509	0.00726054
ENSMUSG00000041220	Elovl6	51.08	58.82	60.12	58.4	102.94	75.67	81.98	88.08	0.51	0.00163089
ENSMUSG00000028675	Pnrc2	33.3	35.81	31.66	34.76	49.38	45.18	60.03	51.16	0.51	0.00915668
ENSMUSG00000026566	Mpzl1	28.45	29.6	20.44	31.17	46.87	45.18	38.92	36.18	0.51	0.0386686
ENSMUSG00000009376	Met	229.84	221.41	177.95	224.65	342.7	288.34	360.2	325.26	0.511	4.67594e-06
ENSMUSG00000071604	Fam189a2	27.15	36.9	34.07	37.26	58.16	43.34	59.21	44.59	0.511	0.0244575
ENSMUSG00000035413	Tmem98	651.38	573.63	676.93	699.76	892.53	973.39	1080.61	1040.09	0.512	3.69125e-10
ENSMUSG00000003279	Dlgap1	242.45	306.91	314.62	315.3	457.35	457.31	474.06	429.05	0.512	3.1864e-08
ENSMUSG00000019818	Cd164	204.95	237.86	300.19	241.85	389.15	338.67	369.72	355.96	0.514	2.50594e-06
ENSMUSG00000096210	H1f0	89.87	85.5	104.61	99.61	147.29	138.11	130	160.44	0.514	4.36953e-05
ENSMUSG00000030417	Pdcd5	26.51	39.46	35.67	24.36	40.59	49.22	52.58	48.24	0.514	0.0307888
ENSMUSG00000036814	Slc6a20a	227.58	293.03	297.78	275.17	410.49	421.31	423.13	430.14	0.515	6.42174e-09
ENSMUSG00000024423	Impact	43.64	52.25	56.11	51.6	75.74	87.05	76.59	69.07	0.515	0.00182471
ENSMUSG00000028945	Rheb	37.5	36.17	28.46	31.53	38.08	46.65	57.55	61.03	0.515	0.0287998
ENSMUSG00000022353	Mtss1	151.94	156.01	166.73	152.99	241.86	249.78	239.72	222.93	0.517	2.23211e-08
ENSMUSG00000038079	Tmem237	149.67	192.18	193.18	165.53	281.19	283.94	250.9	247.42	0.517	2.90781e-06
ENSMUSG00000050953	Gja1	165.19	214.84	245.68	237.55	307.55	325.81	378.83	337.32	0.518	1.31478e-05
ENSMUSG00000020571	Pdia6	101.18	109.98	102.2	115.73	175.74	164.56	156.09	157.88	0.519	2.98514e-06
ENSMUSG00000021702	Thbs4	105.71	155.65	194.78	152.64	260.69	230.68	232.27	212.7	0.519	0.000504366
ENSMUSG00000047409	Ctdspl	69.5	86.96	92.98	90.29	143.94	123.79	122.55	129.01	0.52	0.000127253
ENSMUSG00000073639	Rab18	45.58	65.77	54.51	59.12	94.99	74.2	92.33	81.5	0.52	0.00268435
ENSMUSG00000010307	Tmem86a	45.26	50.06	45.69	61.27	84.94	71.99	80.32	69.07	0.52	0.00329576
ENSMUSG00000036817	Sun1	21.98	37.27	38.48	25.08	50.63	51.42	39.33	44.95	0.52	0.0481059
ENSMUSG00000030862	Cpxm2	332.32	322.26	344.28	311.72	515.94	490.74	466.61	528.45	0.523	7.41898e-12
ENSMUSG00000037706	Cd81	276.07	285.72	270.53	275.89	430.16	416.17	420.24	429.41	0.524	4.79817e-13
ENSMUSG00000027630	Tbl1xr1	51.08	37.27	34.47	53.75	65.69	70.89	55.48	78.94	0.524	0.01887
ENSMUSG00000027829	Ccnl1	185.55	133.36	113.02	130.42	184.95	203.86	208.25	210.87	0.526	9.243e-05
ENSMUSG00000029229	Chic2	26.51	34.34	36.47	46.58	56.49	59.14	59.62	36.55	0.527	0.0466179
ENSMUSG00000066324	Impad1	154.52	169.9	169.93	159.09	248.97	271.45	238.06	241.93	0.528	1.25575e-08
ENSMUSG00000026970	Rbms1	138.68	187.8	171.94	162.67	259.01	231.78	273.67	254.36	0.528	1.1285e-06
ENSMUSG00000055435	Maf	120.9	146.88	173.54	146.19	205.87	218.55	232.27	239.01	0.528	4.96016e-06
ENSMUSG00000029174	Tbc1d1	236.63	258.68	245.68	257.98	392.91	401.85	360.62	377.15	0.529	8.43303e-11
ENSMUSG00000062078	Qk	42.35	43.48	50.5	49.45	78.67	62.81	67.49	76.02	0.53	0.0016355
ENSMUSG00000039633	Lonrf1	28.45	19.36	33.67	22.93	35.57	36	45.13	43.49	0.531	0.0431909
ENSMUSG00000028917	Plekhm2	31.03	24.48	25.25	22.57	36.4	49.96	38.09	35.45	0.532	0.0352741
ENSMUSG00000021054	Sgpp1	24.57	50.06	58.11	46.22	77.83	73.1	81.98	58.11	0.533	0.0300042
ENSMUSG00000025138	Sirt7	21.66	20.1	19.64	29.38	33.06	29.39	39.33	36.91	0.533	0.0443227
ENSMUSG00000042508	Dmtf1	31.03	27.4	24.05	36.9	46.87	38.94	53.82	45.32	0.534	0.0238698
ENSMUSG00000114796	AC144949.1	32.97	36.54	35.67	40.13	47.28	46.65	66.24	63.96	0.535	0.0106551
ENSMUSG00000019810	Fuca2	29.09	34.34	48.9	40.85	65.28	40.4	61.69	63.22	0.537	0.0298597
ENSMUSG00000047414	Flrt2	64.65	90.61	82.56	75.24	127.21	111.66	125.45	118.77	0.539	9.45478e-05
ENSMUSG00000027660	Skil	19.4	29.23	22.84	30.46	45.61	41.51	33.12	37.28	0.541	0.0374521
ENSMUSG00000042354	Gnl3	28.12	27.04	31.66	40.49	59.84	57.3	35.61	42.76	0.541	0.0456418
ENSMUSG00000033910	Gucy1a3	38.79	48.59	38.07	38.34	65.28	55.83	55.07	79.3	0.542	0.00716923
ENSMUSG00000027346	Gpcpd1	85.34	59.92	62.92	58.04	64.86	99.91	113.44	107.81	0.544	0.00740572
ENSMUSG00000022043	Trim35	64.65	91.71	88.97	93.87	139.76	115.71	144.49	136.32	0.545	0.000182402
ENSMUSG00000027999	Pla2g12a	36.85	34.71	41.28	34.4	65.28	46.65	67.07	50.07	0.546	0.0092452
ENSMUSG00000027712	Anxa5	26.51	29.23	44.49	28.66	50.21	39.67	49.68	50.8	0.546	0.020808
ENSMUSG00000025702	March8	24.57	34.34	32.46	46.22	58.16	55.83	42.64	48.61	0.546	0.0299994
ENSMUSG00000001768	Rin2	18.75	20.83	20.44	24.72	33.48	31.22	34.78	32.53	0.549	0.0204257
ENSMUSG00000063511	Snrnp70	152.58	183.78	177.95	163.03	262.36	281	257.94	251.44	0.55	6.22295e-09
ENSMUSG00000030522	Mtmr10	64.01	70.88	56.11	51.95	73.65	95.5	93.57	118.77	0.552	0.00259399
ENSMUSG00000018500	Adora2b	27.8	35.08	42.48	44.79	66.95	49.59	63.35	55.55	0.556	0.011739
ENSMUSG00000025232	Hexa	45.58	71.61	54.11	42.28	68.62	91.46	84.88	73.82	0.557	0.00557992
ENSMUSG00000034573	Ptpn13	59.16	49.33	48.09	37.62	63.18	64.65	84.88	91	0.559	0.00752571
ENSMUSG00000074064	Mlycd	22.31	26.31	25.25	24.72	42.26	39.67	33.95	38.37	0.559	0.0101804
ENSMUSG00000024806	Mlana	66.59	51.52	56.51	42.64	76.16	77.5	100.61	82.59	0.562	0.00276679
ENSMUSG00000032575	Manf	25.54	39.46	40.08	44.79	64.44	57.67	64.17	54.82	0.562	0.00757744
ENSMUSG00000008090	Fgfrl1	44.93	28.5	27.25	32.61	56.91	42.98	45.13	56.65	0.562	0.0219223
ENSMUSG00000013275	Slc41a1	18.43	36.54	37.27	23.65	41.84	46.65	47.2	49.7	0.562	0.0359468
ENSMUSG00000028278	Rragd	69.5	97.55	85.37	75.24	137.25	124.15	123.38	124.62	0.563	3.58895e-05
ENSMUSG00000034120	Srsf2	66.27	59.19	80.96	62.34	126.37	73.46	105.58	107.44	0.563	0.00250121
ENSMUSG00000021187	Tc2n	58.83	59.92	48.9	62.7	98.33	94.77	84.05	85.88	0.564	0.00018413
ENSMUSG00000030042	Pole4	50.11	54.81	61.72	56.97	89.96	94.03	94.81	59.57	0.566	0.0016736
ENSMUSG00000041890	Git2	21.01	23.02	31.26	26.16	46.03	31.96	47.61	33.99	0.566	0.0334782
ENSMUSG00000027070	Lrp2	90.84	85.13	86.97	92.44	133.06	142.15	147.81	137.78	0.567	3.27173e-07
ENSMUSG00000075569	Rsph10b	100.21	76.73	80.16	99.25	134.74	134.07	127.52	181.27	0.567	0.000303656
ENSMUSG00000023010	Tmbim6	256.35	405.56	460.9	344.33	603.81	563.1	631.8	557.69	0.568	7.30336e-06
ENSMUSG00000071649	B3gat3	20.37	16.44	18.84	18.27	31.8	23.51	31.47	30.33	0.568	0.0318625
ENSMUSG00000035329	Fbxo33	44.93	54.81	46.49	36.55	57.74	65.75	84.88	80.04	0.569	0.00416882
ENSMUSG00000029816	Gpnmb	310.34	245.89	231.65	289.51	430.16	415.44	412.78	431.61	0.57	4.35311e-08
ENSMUSG00000037712	Fermt2	40.73	74.54	71.74	69.87	105.87	91.46	108.89	119.87	0.572	0.00124397
ENSMUSG00000073481	Marc2	45.9	48.23	41.28	30.46	68.21	61.34	81.56	54.45	0.572	0.00890004
ENSMUSG00000024539	Ptpn2	19.4	30.69	28.86	23.65	47.7	33.79	43.06	37.28	0.572	0.0247614
ENSMUSG00000039913	Pak7	119.93	111.07	107.41	126.48	174.49	194.68	207.01	160.44	0.574	2.59573e-06
ENSMUSG00000062421	Arf2	26.18	33.25	32.46	29.02	58.58	47.02	45.13	41.3	0.574	0.00846143
ENSMUSG00000015143	Actn1	78.23	120.94	139.87	109.64	162.35	198.35	187.14	179.44	0.575	0.00010871
ENSMUSG00000032557	Uba5	28.45	47.5	32.86	54.82	73.65	59.51	41.82	73.46	0.575	0.0462715
ENSMUSG00000079562	Maea	36.85	41.65	50.1	55.89	91.22	70.16	66.66	67.98	0.578	0.00423649
ENSMUSG00000046841	Ckap4	22.95	28.5	21.24	38.7	36.82	38.94	49.27	43.86	0.578	0.02864
ENSMUSG00000037361	Sf3b6	41.38	53.34	82.56	62.34	108.79	81.91	92.33	83.32	0.579	0.00663257
ENSMUSG00000033933	Vhl	26.83	28.86	30.86	24.01	55.23	27.92	46.37	42.39	0.579	0.0294455
ENSMUSG00000041889	Shisa4	39.44	38.73	32.06	36.9	59.42	52.53	69.14	54.09	0.581	0.00201473
ENSMUSG00000071528	Usmg5	70.15	184.15	215.62	163.38	325.55	288.34	243.45	243.4	0.581	0.00789384
ENSMUSG00000028394	Pole3	21.66	27.04	30.06	35.83	51.89	47.38	48.44	33.99	0.583	0.0237307
ENSMUSG00000028221	Tmem55a	40.41	50.42	46.49	42.64	68.21	65.75	66.24	92.1	0.584	0.00122578
ENSMUSG00000043683	Fem1a	17.13	23.38	27.25	19.71	31.8	40.04	36.85	29.97	0.584	0.0260638
ENSMUSG00000046062	Ppp1r15b	32	33.98	31.26	37.26	54.82	47.02	54.65	58.47	0.585	0.00142684
ENSMUSG00000037580	Gch1	18.1	26.31	26.05	26.87	37.24	38.57	40.16	38.74	0.585	0.01021
ENSMUSG00000004562	Arhgef40	17.13	29.96	36.47	28.66	40.59	37.1	50.51	55.55	0.585	0.0341702
ENSMUSG00000060429	Sntb1	38.15	40.19	49.7	56.97	71.55	64.28	80.32	75.28	0.586	0.00162119
ENSMUSG00000031765	Mt1	3600.54	3512.31	3425.92	3495.94	5574.44	5461.64	5845.21	5550.22	0.587	1.39357e-28
ENSMUSG00000047205	Dusp18	33.62	38.73	42.08	44.07	73.65	66.85	53.41	58.84	0.587	0.00222665
ENSMUSG00000037674	Rfx7	17.13	22.29	15.23	17.2	23.85	34.16	29.4	27.41	0.587	0.0356717
ENSMUSG00000027227	Sord	43.32	48.59	33.67	44.07	63.18	67.95	94.4	58.11	0.588	0.00573416
ENSMUSG00000026727	Rsu1	32.97	29.6	29.66	25.44	35.15	36.36	70.8	57.01	0.588	0.0398622
ENSMUSG00000038156	Spon1	285.77	293.03	297.38	334.29	483.72	482.29	509.25	455	0.589	7.31222e-13
ENSMUSG00000039682	Lap3	16.81	14.25	17.23	17.2	22.6	24.24	27.33	30.7	0.589	0.0318245
ENSMUSG00000019923	Zwint	31.03	44.58	47.69	41.92	66.95	75.67	63.35	59.2	0.59	0.00225873
ENSMUSG00000038418	Egr1	250.85	267.45	314.22	281.98	458.61	444.82	455.84	418.45	0.591	1.15141e-11
ENSMUSG00000034210	Efcab14	136.74	107.05	121.84	127.2	202.52	171.17	213.22	204.66	0.591	6.96899e-07
ENSMUSG00000004347	Pde1c	118.64	111.8	125.45	111.79	220.94	187.7	184.66	167.38	0.592	5.5058e-07
ENSMUSG00000002871	Tpra1	28.77	37.27	55.31	31.53	57.33	54.73	61.69	52.26	0.592	0.00776927
ENSMUSG00000052387	Trpm3	340.08	302.89	311.01	309.93	556.94	466.13	550.65	454.26	0.593	6.4468e-10
ENSMUSG00000024589	Nedd4l	71.44	84.4	88.57	74.53	115.49	166.03	114.69	132.66	0.594	8.01934e-05
ENSMUSG00000036291	Ap5m1	19.72	16.81	22.84	18.63	23.43	27.18	33.95	41.66	0.594	0.0432354
ENSMUSG00000020263	Appl2	136.42	158.21	162.72	149.77	243.95	228.1	242.2	259.48	0.595	1.6008e-10
ENSMUSG00000064210	Ano6	22.31	21.19	28.86	23.65	30.13	43.71	43.06	36.91	0.595	0.0147139
ENSMUSG00000024302	Dtna	47.2	42.38	46.49	34.4	58.58	74.57	56.31	85.88	0.596	0.00401957
ENSMUSG00000073411	H2-D1	27.8	23.75	44.09	25.8	35.99	43.34	48.44	54.82	0.597	0.0230092
ENSMUSG00000016344	Ppdpf	27.48	31.42	37.67	45.5	80.34	45.18	56.72	54.45	0.598	0.0199639
ENSMUSG00000032875	Arhgef17	16.49	21.56	22.84	18.27	29.29	28.28	31.05	38.37	0.599	0.0200632
ENSMUSG00000057969	Sema3b	140.94	120.57	88.57	115.37	179.51	184.03	216.54	180.54	0.6	1.95999e-05
ENSMUSG00000061808	Ttr	20479.5	19762.5	20594	20346.8	33858.8	30696.4	33474.4	32923.4	0.601	5.41506e-28
ENSMUSG00000029622	Arpc1b	51.72	43.48	70.54	52.67	80.34	80.44	94.4	85.88	0.601	0.000492676
ENSMUSG00000005054	Cstb	43.32	64.31	55.71	49.8	64.86	98.07	115.1	73.82	0.601	0.00657478
ENSMUSG00000046230	Vps13a	21.66	25.94	24.05	22.21	33.89	44.08	41.82	31.43	0.601	0.0115881
ENSMUSG00000068220	Lgals1	34.91	42.02	28.06	37.98	46.87	56.2	56.31	75.65	0.602	0.00679808
ENSMUSG00000029202	Pds5a	32.65	31.06	22.84	34.76	48.96	52.89	34.36	57.74	0.605	0.0138841
ENSMUSG00000032412	Atp1b3	20.04	22.29	28.06	34.76	44.77	36.73	38.92	45.32	0.607	0.0166429
ENSMUSG00000075703	Selenoi	32.97	30.69	39.28	41.56	69.46	48.85	45.96	69.8	0.608	0.00756874
ENSMUSG00000025511	Tspan4	21.34	25.94	14.43	20.42	38.5	26.08	36.43	33.26	0.608	0.0320603
ENSMUSG00000027254	Map1a	75.97	58.46	52.9	63.42	90.8	83.38	112.61	117.31	0.609	0.00056087
ENSMUSG00000025239	Limd1	28.12	51.15	43.28	38.34	75.74	59.14	73.7	55.18	0.609	0.0068467
ENSMUSG00000021840	Mapk1ip1l	25.86	31.79	30.86	34.76	46.45	57.67	46.37	48.97	0.61	0.0023388
ENSMUSG00000020078	Vps26a	18.43	26.31	26.05	28.31	37.66	41.51	33.54	47.88	0.614	0.0118944
ENSMUSG00000018899	Irf1	15.19	19	23.65	14.33	30.96	31.22	28.57	25.95	0.615	0.0274674
ENSMUSG00000020230	Prmt2	26.18	32.15	18.84	17.92	46.45	30.49	38.92	37.28	0.615	0.0329789
ENSMUSG00000020097	Sgpl1	20.69	29.96	32.86	21.5	51.05	42.61	27.74	45.68	0.616	0.0294455
ENSMUSG00000006373	Pgrmc1	33.62	44.94	38.88	39.05	71.13	74.2	58.38	50.07	0.617	0.00250111
ENSMUSG00000027709	Mccc1	36.21	22.29	36.07	27.23	71.55	57.67	39.33	38.37	0.617	0.0402567
ENSMUSG00000070780	Rbm47	147.73	217.03	247.29	198.5	332.66	332.06	378.01	308.81	0.618	1.28457e-06
ENSMUSG00000015243	Abca1	23.28	32.52	32.86	26.51	59.84	42.24	36.02	51.16	0.618	0.0128482
ENSMUSG00000025268	Maged2	26.18	34.34	28.86	33.68	43.52	46.65	56.31	54.82	0.621	0.00202217
ENSMUSG00000025006	Sorbs1	80.49	80.02	87.37	76.68	123.86	140.68	137.04	129.01	0.622	6.16837e-08
ENSMUSG00000028138	Adh5	61.42	89.15	81.76	71.3	138.5	118.64	134.14	104.89	0.623	6.24105e-05
ENSMUSG00000030103	Bhlhe40	50.11	55.17	67.73	67.36	79.92	98.07	98.95	115.85	0.623	0.00017757
ENSMUSG00000005949	Ctns	13.9	12.42	13.23	11.47	16.74	23.88	18.22	24.85	0.626	0.0494466
ENSMUSG00000039474	Wfs1	14.22	14.61	20.84	10.39	22.6	21.67	24.43	27.77	0.626	0.0497373
ENSMUSG00000027852	Nras	35.88	35.44	37.67	39.77	66.11	59.51	43.06	70.17	0.628	0.00168905
ENSMUSG00000028293	Slc35a1	28.45	25.94	23.65	31.89	65.28	45.55	39.33	40.57	0.628	0.011739
ENSMUSG00000027952	Pmvk	27.8	32.15	30.86	26.51	52.72	49.59	50.93	39.83	0.63	0.00193204
ENSMUSG00000033065	Pfkm	11.64	25.21	24.45	26.16	29.29	41.87	35.61	43.49	0.63	0.033639
ENSMUSG00000064037	Gpn1	25.21	20.1	16.03	15.41	39.33	25.34	31.88	29.6	0.63	0.0353265
ENSMUSG00000031367	Ap1s2	67.56	64.31	60.92	51.6	89.13	113.5	117.17	81.86	0.631	0.000237285
ENSMUSG00000004263	Atn1	17.46	11.33	15.23	13.97	26.78	25.71	24.84	18.64	0.631	0.0432183
ENSMUSG00000040649	Rimklb	32.97	36.9	38.07	50.16	64.86	63.91	67.07	58.47	0.633	0.000694133
ENSMUSG00000039007	Cpq	36.21	70.15	71.34	55.89	108.79	96.24	108.47	89.9	0.633	0.000806288
ENSMUSG00000037119	Fam91a1	24.24	14.25	20.04	16.12	34.73	31.96	24.43	31.79	0.634	0.0298532
ENSMUSG00000042328	Hps4	31.03	28.13	30.06	31.89	50.21	58.4	52.58	33.26	0.636	0.00564518
ENSMUSG00000021760	Gpx8	20.37	20.46	18.44	22.57	28.87	24.98	39.33	42.76	0.638	0.0209939
ENSMUSG00000021917	Spcs1	44.29	59.56	63.32	59.48	99.59	79.71	106.82	90.63	0.639	0.000105466
ENSMUSG00000052713	Zfp608	27.48	25.21	33.67	29.38	57.33	36.36	43.89	54.45	0.642	0.005718
ENSMUSG00000071064	Zfp827	22.63	27.04	36.87	24.01	49.38	46.65	40.57	41.3	0.643	0.00538413
ENSMUSG00000028494	Plin2	73.7	74.17	54.51	68.08	117.16	102.48	116.76	120.24	0.645	3.97538e-06
ENSMUSG00000046432	Bex3	48.81	51.88	50.9	54.82	80.76	92.56	95.23	74.92	0.645	1.93528e-05
ENSMUSG00000065979	Cpped1	34.59	42.02	49.7	32.96	69.46	67.22	57.14	67.61	0.645	0.000576788
ENSMUSG00000031772	Cntnap4	34.59	37.63	50.1	53.39	91.22	84.85	58.79	57.74	0.645	0.00726054
ENSMUSG00000056260	Lrif1	13.58	19.36	22.44	20.42	28.87	29.75	29.81	36.91	0.645	0.0149141
ENSMUSG00000021477	Ctsl	86.96	120.57	157.91	117.88	166.54	203.86	230.2	190.77	0.647	4.79324e-05
ENSMUSG00000039405	Prss23	42.35	50.79	38.88	51.95	70.3	61.34	81.56	100.14	0.647	0.00107598
ENSMUSG00000047473	Zfp30	44.61	30.33	25.65	29.74	54.4	39.67	57.96	56.28	0.648	0.00765351
ENSMUSG00000032040	Dcps	32.33	30.33	30.46	21.5	46.03	51.42	49.68	44.95	0.649	0.00178063
ENSMUSG00000051910	Sox6	43.96	22.65	32.86	24.72	57.74	44.08	56.72	38.01	0.649	0.0217828
ENSMUSG00000022508	Bcl6	27.48	18.27	16.43	15.05	26.36	30.12	33.54	32.53	0.649	0.0246505
ENSMUSG00000031879	Fam96b	13.9	23.75	14.43	13.26	23.43	22.04	26.08	32.53	0.649	0.0443567
ENSMUSG00000052684	Jun	195.25	218.49	187.97	227.52	324.29	356.3	353.99	350.11	0.65	3.96232e-13
ENSMUSG00000054942	Miga1	52.37	54.44	54.91	63.42	102.52	89.26	97.71	86.61	0.65	5.15544e-06
ENSMUSG00000061232	H2-K1	30.06	26.31	44.09	26.51	53.56	47.75	48.44	51.16	0.651	0.00257254
ENSMUSG00000026064	Ptp4a1	18.1	20.83	23.25	21.86	33.48	43.34	37.26	24.49	0.653	0.0163553
ENSMUSG00000033209	Ttc28	74.35	61.02	54.51	46.94	79.92	108.73	98.54	99.04	0.654	0.0002117
ENSMUSG00000052557	Gan	11.96	20.83	13.63	17.92	25.94	30.85	31.47	19.37	0.654	0.0459
ENSMUSG00000054091	1810037I17Rik	50.75	69.79	60.52	65.21	119.67	90.73	118	76.75	0.655	0.000376725
ENSMUSG00000036528	Ppfibp2	174.56	166.97	152.3	150.49	305.88	265.57	270.77	245.95	0.658	2.48324e-10
ENSMUSG00000021696	Elovl7	143.85	145.78	155.51	154.79	256.5	275.12	250.49	218.54	0.66	5.87285e-11
ENSMUSG00000031647	Mfap3l	191.7	187.44	166.73	169.48	331.4	286.88	247.17	321.97	0.661	1.4906e-09
ENSMUSG00000041650	Pcca	18.1	19	16.83	15.77	33.06	31.59	24.01	28.87	0.663	0.00970056
ENSMUSG00000033149	Phldb2	52.69	48.59	47.69	51.95	97.91	75.67	88.6	77.84	0.665	1.80602e-05
ENSMUSG00000054889	Dsp	69.18	40.92	34.87	51.95	81.6	66.12	89.43	77.11	0.665	0.0026235
ENSMUSG00000032526	Ss18l2	25.86	47.86	51.3	40.49	82.85	66.85	53.82	82.96	0.665	0.00514075
ENSMUSG00000021585	Cast	27.8	24.85	20.04	30.46	46.03	47.02	39.33	42.39	0.666	0.00255001
ENSMUSG00000029192	Tbc1d14	19.07	14.25	22.04	20.78	35.99	27.18	32.29	33.26	0.667	0.00982852
ENSMUSG00000037762	Slc16a9	117.67	174.28	179.55	140.1	246.04	282.1	273.67	252.17	0.668	5.44138e-08
ENSMUSG00000039714	Cplx3	29.09	35.81	19.64	28.66	54.4	43.71	51.75	46.05	0.668	0.00322683
ENSMUSG00000027257	Pacsin3	41.05	25.21	28.46	41.92	53.14	57.3	65	59.2	0.669	0.00231653
ENSMUSG00000005907	Pex1	11.64	9.87	14.03	13.97	23.01	15.43	23.6	21.93	0.67	0.0407981
ENSMUSG00000033585	Ndn	27.8	27.77	30.86	36.9	69.88	56.93	38.5	47.88	0.671	0.00609897
ENSMUSG00000028619	Tceanc2	13.9	8.77	14.03	13.97	19.67	23.51	19.46	23.39	0.673	0.0321963
ENSMUSG00000021144	Mta1	13.58	17.9	32.06	21.86	43.94	30.12	31.05	30.33	0.673	0.0372451
ENSMUSG00000025558	Dock9	27.8	21.56	26.85	18.63	42.26	36	31.05	55.55	0.675	0.0137928
ENSMUSG00000003662	Ciao1	13.58	10.96	12.83	15.05	25.52	20.94	19.87	23.02	0.676	0.0214201
ENSMUSG00000113741	AC159635.2	36.21	35.44	33.27	52.31	60.67	65.38	63.35	66.51	0.679	0.000263429
ENSMUSG00000049489	Fam58b	16.81	20.46	30.86	17.92	36.82	31.59	35.19	34.35	0.679	0.00923774
ENSMUSG00000046806	3110062M04Rik	18.1	27.77	22.44	18.27	36.82	33.43	46.78	30.33	0.679	0.0107792
ENSMUSG00000047361	Gm973	150.32	109.98	114.22	131.5	169.47	243.53	247.17	190.04	0.68	1.09565e-05
ENSMUSG00000012187	Mogat1	19.72	27.4	36.87	32.25	52.72	42.24	50.93	54.82	0.68	0.00334045
ENSMUSG00000040219	Ttc12	36.53	32.52	36.07	36.55	64.86	65.38	49.27	62.13	0.681	0.000141845
ENSMUSG00000018932	Map2k3	21.01	29.96	17.23	22.93	46.03	41.14	23.19	40.57	0.681	0.0211606
ENSMUSG00000024992	Pde6c	14.87	17.9	18.04	15.05	14.65	25.71	30.22	39.1	0.681	0.04668
ENSMUSG00000039100	March6	25.21	20.83	41.28	25.08	41.84	47.38	55.89	34.35	0.682	0.013795
ENSMUSG00000032387	Rbpms2	21.01	17.9	20.44	22.21	23.43	37.47	31.88	47.51	0.682	0.0169299
ENSMUSG00000024014	Pim1	24.57	36.9	34.07	35.47	45.19	64.65	65.42	47.88	0.684	0.00222473
ENSMUSG00000022194	Pabpn1	21.98	37.63	38.07	42.28	80.34	59.51	45.13	64.32	0.69	0.00705873
ENSMUSG00000036111	Lmo1	49.14	74.9	48.9	35.47	92.89	89.99	79.49	75.28	0.691	0.000716116
ENSMUSG00000051495	Irf2bp2	42.02	54.44	48.09	53.39	100.43	87.79	74.11	78.21	0.692	3.4745e-05
ENSMUSG00000026657	Frmd4a	9.37	12.42	14.83	14.33	13.81	22.41	26.5	24.12	0.695	0.0457192
ENSMUSG00000049106	Dcaf5	19.07	19.36	31.26	29.38	30.96	47.02	42.23	49.7	0.696	0.00996754
ENSMUSG00000022898	Dscr3	16.49	14.61	11.62	19.35	29.29	19.47	29.4	29.6	0.696	0.02306
ENSMUSG00000018849	Wwc1	57.86	66.13	70.94	63.78	134.74	95.14	97.71	123.52	0.697	6.79182e-06
ENSMUSG00000030759	Far1	22.63	39.09	43.28	40.85	80.34	48.12	75.77	54.09	0.697	0.00756408
ENSMUSG00000019779	Frk	8.73	9.87	15.23	15.41	26.36	21.67	18.63	17.91	0.697	0.0495234
ENSMUSG00000031351	Zfp185	24.57	19.36	15.23	13.62	25.94	25.71	38.5	33.99	0.698	0.0225101
ENSMUSG00000032376	Usp3	11.31	27.04	16.83	21.14	28.45	43.71	30.22	29.24	0.698	0.0370234
ENSMUSG00000021589	Rhobtb3	35.24	31.06	30.86	25.44	65.28	51.79	38.5	54.82	0.7	0.00201124
ENSMUSG00000042410	Agps	12.93	18.27	24.05	23.29	30.55	27.55	33.12	46.41	0.7	0.0213128
ENSMUSG00000030341	Tnfrsf1a	39.44	24.48	29.26	45.15	64.86	62.81	61.69	50.43	0.701	0.00247616
ENSMUSG00000002365	Snx9	16.81	14.61	19.24	11.82	27.62	27.92	25.67	26.68	0.701	0.00945042
ENSMUSG00000049288	Lix1l	16.16	20.83	30.86	29.38	48.96	33.79	44.3	42.39	0.701	0.00945095
ENSMUSG00000035725	Prkx	13.25	21.19	22.44	15.05	48.12	23.14	29.81	30.7	0.701	0.0349934
ENSMUSG00000052889	Prkcb	36.85	33.25	28.46	20.78	59.84	48.12	50.51	52.63	0.703	0.00143897
ENSMUSG00000009108	Gnat2	25.21	19.36	16.43	23.29	38.91	38.94	29.81	39.1	0.703	0.00450919
ENSMUSG00000030339	Ltbr	60.77	58.09	55.31	58.76	119.67	68.69	90.26	113.66	0.704	7.93991e-05
ENSMUSG00000020589	Fam49a	9.7	14.25	18.84	14.33	23.43	28.28	24.01	22.66	0.707	0.0207344
ENSMUSG00000036565	Ttyh3	7.76	11.33	12.83	16.12	19.67	19.47	24.01	20.1	0.709	0.0371461
ENSMUSG00000052681	Rap1b	39.76	52.61	71.74	54.1	89.55	91.46	96.05	92.46	0.71	2.41895e-05
ENSMUSG00000019975	Ikbip	35.56	35.08	43.28	31.53	55.65	62.44	72.45	62.13	0.71	6.08253e-05
ENSMUSG00000031955	Bcar1	43.64	79.65	79.76	76.68	136.41	113.13	137.46	127.18	0.711	8.0658e-06
ENSMUSG00000046727	Cystm1	36.53	47.86	63.32	59.84	110.47	79.71	100.61	75.65	0.711	0.000645009
ENSMUSG00000042312	S100a13	15.52	15.35	28.06	31.53	38.08	50.32	39.33	25.95	0.711	0.0440942
ENSMUSG00000002325	Irf9	25.54	27.04	23.25	23.65	43.94	38.57	36.85	55.92	0.713	0.00160194
ENSMUSG00000041362	Shtn1	31.36	27.04	24.85	36.55	51.47	41.14	52.58	64.69	0.714	0.00142356
ENSMUSG00000020580	Rock2	125.75	114	114.22	111.79	185.79	226.27	206.6	195.89	0.716	1.13332e-11
ENSMUSG00000020484	Xbp1	20.37	33.98	29.26	31.53	50.63	54.36	47.61	50.8	0.716	0.000530227
ENSMUSG00000024935	Slc1a1	288.68	237.13	242.88	206.74	450.24	379.44	402.02	430.51	0.717	7.98278e-12
ENSMUSG00000031565	Fgfr1	44.61	70.52	73.34	71.3	133.9	91.09	118.41	121.33	0.718	4.25539e-05
ENSMUSG00000022216	Psme1	51.08	44.58	32.86	57.69	80.34	80.08	71.63	104.16	0.718	0.000330086
ENSMUSG00000019997	Ctgf	48.81	142.86	229.65	167.68	265.71	255.29	287.75	275.56	0.718	0.00309833
ENSMUSG00000019883	Echdc1	16.16	16.44	13.23	20.06	28.45	24.24	27.33	35.81	0.719	0.00899583
ENSMUSG00000059326	Csf2ra	10.34	13.15	7.61	15.41	18.83	19.47	18.22	25.22	0.719	0.0388596
ENSMUSG00000004936	Map2k1	21.34	36.9	39.68	37.62	72.81	47.02	67.07	57.74	0.72	0.00218637
ENSMUSG00000022272	Myo10	91.16	84.04	82.56	88.86	173.65	142.15	145.32	150.57	0.721	7.28335e-10
ENSMUSG00000026510	Trp53bp2	22.95	20.46	19.24	20.42	40.17	31.59	28.57	45.68	0.721	0.00416882
ENSMUSG00000026749	Nek6	67.89	46.77	41.68	51.6	96.24	87.79	87.36	79.3	0.722	4.14931e-05
ENSMUSG00000048612	Myof	21.66	21.19	26.05	20.78	41.01	42.24	31.05	42.76	0.724	0.00125664
ENSMUSG00000031586	Rbpms	20.04	16.08	22.44	12.18	15.9	29.02	37.68	37.28	0.725	0.0374365
ENSMUSG00000036275	9530068E07Rik	35.24	63.57	75.35	57.33	90.8	135.91	90.67	113.29	0.727	0.00071922
ENSMUSG00000024095	Hnrnpll	58.51	49.69	62.12	49.45	88.29	94.77	101.02	103.42	0.729	1.74773e-07
ENSMUSG00000021745	Ptprg	15.19	12.06	8.02	12.9	25.94	25.71	14.49	19.37	0.729	0.0485597
ENSMUSG00000042705	Commd10	22.31	23.02	23.25	24.36	43.52	47.38	41.4	29.6	0.73	0.0018047
ENSMUSG00000027018	Hat1	13.58	17.17	18.84	17.92	30.13	37.47	29.81	19.37	0.73	0.0160553
ENSMUSG00000075585	6330403L08Rik	10.67	9.87	8.82	8.24	19.67	19.1	12.42	15.35	0.73	0.0442426
ENSMUSG00000015961	Adss	14.87	10.23	10.82	12.18	30.55	23.51	16.98	16.45	0.73	0.0459434
ENSMUSG00000030560	Ctsc	46.23	73.8	84.17	68.08	113.4	135.91	128.35	120.24	0.731	2.98514e-06
ENSMUSG00000029456	Acad10	9.05	14.25	16.83	12.9	27.2	23.88	17.8	24.12	0.732	0.0234226
ENSMUSG00000039646	Vasn	74.03	117.65	114.62	108.21	199.6	206.43	180.93	170.3	0.733	4.95474e-08
ENSMUSG00000023092	Fhl1	35.88	58.46	53.3	36.9	95.82	72.73	73.7	78.94	0.734	0.000240041
ENSMUSG00000061859	Patj	22.63	28.5	27.65	31.89	46.45	63.18	40.99	47.88	0.734	0.001042
ENSMUSG00000030298	Sec13	17.13	30.69	25.65	36.55	46.45	46.28	43.06	61.4	0.735	0.0044965
ENSMUSG00000032295	Man2c1	13.58	11.33	14.43	15.77	19.67	27.92	24.84	25.22	0.737	0.00938243
ENSMUSG00000041341	Atg2b	13.25	13.88	18.84	12.9	33.48	24.98	17.8	27.77	0.739	0.0205527
ENSMUSG00000026556	Vangl2	10.02	12.79	5.21	9.67	17.57	18.37	16.98	15.71	0.739	0.0479224
ENSMUSG00000026235	Epha4	22.95	36.17	33.67	22.93	53.14	52.89	36.85	60.3	0.741	0.00249786
ENSMUSG00000059743	Fdps	9.05	28.5	21.24	25.8	48.12	36.36	40.16	36.91	0.741	0.0143605
ENSMUSG00000067276	Capn6	26.18	30.69	56.91	36.19	56.49	56.2	53.41	75.28	0.743	0.0018372
ENSMUSG00000000001	Gnai3	12.93	25.94	21.24	15.41	49.79	30.12	34.78	24.49	0.744	0.0299749
ENSMUSG00000027371	Fahd2a	12.61	18.27	9.22	14.33	24.69	21.3	28.15	23.39	0.745	0.0162612
ENSMUSG00000068749	Psma5	5.5	16.44	22.04	14.69	28.04	26.81	26.91	28.51	0.746	0.0340334
ENSMUSG00000004032	Gstm5	63.68	71.25	76.55	79.9	145.2	136.64	126.28	110.37	0.747	5.06551e-08
ENSMUSG00000101609	Kcnq1ot1	119.93	99.75	93.78	87.43	164.86	156.84	177.2	209.77	0.748	2.0829e-08
ENSMUSG00000098682	Otx2os1	48.49	44.94	43.28	51.24	78.67	91.46	90.67	75.65	0.748	6.9637e-07
ENSMUSG00000024085	Man2a1	18.75	36.9	25.65	21.5	53.98	29.75	39.75	50.43	0.749	0.0115077
ENSMUSG00000048707	Tprn	8.73	14.61	13.63	9.32	20.09	18.37	18.22	25.58	0.749	0.025667
ENSMUSG00000003545	Fosb	163.9	170.26	185.56	152.99	326.38	311.49	297.27	248.88	0.751	1.0845e-12
ENSMUSG00000040253	Gbp7	29.74	23.02	26.05	18.63	55.65	45.55	38.92	35.81	0.751	0.00294872
ENSMUSG00000036155	Mgat5	22.31	30.33	45.29	26.51	48.12	54.36	57.14	46.78	0.754	0.0010084
ENSMUSG00000005802	Slc30a4	30.06	38.73	49.7	41.2	87.87	49.96	77.42	66.88	0.755	0.000756487
ENSMUSG00000028385	Snx30	14.55	14.25	10.82	12.9	23.85	23.14	21.12	26.68	0.756	0.0062681
ENSMUSG00000098120	Gm5914	13.58	14.98	8.02	10.39	18.83	20.2	21.12	24.85	0.757	0.0198961
ENSMUSG00000018322	Tomm34	7.11	14.61	10.82	7.52	17.57	16.9	20.7	14.98	0.758	0.0470497
ENSMUSG00000020014	Cfap54	29.74	15.35	15.63	21.86	41.84	38.2	27.33	34.35	0.759	0.011676
ENSMUSG00000068923	Syt11	30.39	47.86	48.5	51.24	92.06	84.12	81.56	71.63	0.76	2.95814e-05
ENSMUSG00000000154	Slc22a18	8.4	17.54	12.83	14.33	24.69	24.61	27.74	18.64	0.76	0.0215338
ENSMUSG00000078429	Ctdsp2	28.12	29.96	52.1	33.32	62.35	46.28	62.93	68.71	0.763	0.00071755
ENSMUSG00000024507	Hsd17b4	17.78	15.35	18.84	16.48	29.71	37.47	23.6	32.53	0.763	0.00348285
ENSMUSG00000110634	Gm45895	40.73	14.61	12.83	18.63	30.13	31.96	36.43	27.04	0.766	0.0246406
ENSMUSG00000062115	Rai1	15.52	16.44	17.63	12.54	29.29	28.28	26.5	28.51	0.77	0.00190505
ENSMUSG00000038677	Scube3	11.64	15.71	17.63	12.9	25.94	20.2	23.6	41.3	0.77	0.0202134
ENSMUSG00000078317	F8a	16.81	13.15	9.62	17.2	33.89	29.02	21.12	19.73	0.77	0.0239927
ENSMUSG00000022451	Twf1	21.34	22.65	26.05	26.87	43.1	40.77	50.51	41.66	0.772	0.000144242
ENSMUSG00000002289	Angptl4	14.87	16.81	20.44	22.57	37.24	27.55	36.43	34.35	0.772	0.0021119
ENSMUSG00000045312	Lhfpl2	75.64	89.15	98.99	77.03	212.57	147.66	154.43	138.87	0.775	1.09314e-07
ENSMUSG00000023034	Nr4a1	16.49	40.92	46.49	32.96	64.86	55.1	84.05	61.4	0.775	0.00331533
ENSMUSG00000058831	Opn1sw	69.18	61.75	88.97	74.17	131.39	137.38	136.21	123.89	0.778	3.26522e-09
ENSMUSG00000019951	Uhrf1bp1l	19.72	23.02	22.04	13.62	27.62	41.87	46.37	27.04	0.778	0.00915668
ENSMUSG00000029173	Sepsecs	10.99	12.42	7.21	9.67	12.97	14.69	21.94	24.49	0.78	0.0433123
ENSMUSG00000034640	Tiparp	55.93	46.4	55.31	49.8	105.45	78.24	81.15	120.24	0.781	8.68112e-06
ENSMUSG00000044447	Dock5	15.19	13.15	8.42	27.95	24.27	24.98	23.19	32.16	0.782	0.0336784
ENSMUSG00000038456	Dennd2a	7.11	12.79	18.04	18.27	22.6	34.53	21.53	27.04	0.784	0.0303659
ENSMUSG00000045216	Hs6st1	10.67	13.52	17.63	10.75	15.9	29.75	31.88	18.27	0.784	0.0345496
ENSMUSG00000035441	Myo1d	37.5	32.15	17.63	29.38	60.26	61.71	48.03	54.82	0.785	0.000546016
ENSMUSG00000037730	Mynn	6.47	8.77	8.42	7.17	13.39	16.9	12.83	13.16	0.785	0.0353577
ENSMUSG00000047090	Tmem198b	10.99	9.87	10.42	7.17	12.55	15.43	24.43	18.64	0.786	0.0379019
ENSMUSG00000022790	Igsf11	10.34	10.23	18.44	11.11	28.87	19.47	18.22	21.93	0.789	0.0231827
ENSMUSG00000058672	Tubb2a	32.97	43.84	38.88	38.7	76.57	72.36	59.62	75.28	0.793	2.05328e-06
ENSMUSG00000059493	Nhs	8.08	15.71	8.82	13.97	21.34	20.94	19.46	24.12	0.794	0.0176526
ENSMUSG00000082361	Btc	31.36	29.6	25.65	31.17	60.67	51.06	50.51	56.28	0.797	9.06607e-06
ENSMUSG00000057286	St6galnac2	32.33	25.21	26.85	24.01	53.98	41.87	45.96	59.57	0.799	0.000142688
ENSMUSG00000056091	St3gal5	34.59	18.27	28.06	31.89	45.61	62.08	50.51	58.11	0.799	0.000437059
ENSMUSG00000021069	Pygl	45.58	21.19	25.65	28.66	49.79	46.65	48.44	59.2	0.801	0.000908825
ENSMUSG00000007989	Fzd3	17.78	49.69	24.05	27.59	43.94	42.24	50.51	54.45	0.801	0.0031
ENSMUSG00000025199	Chuk	10.99	27.4	28.06	27.23	33.89	47.02	56.72	47.14	0.803	0.00493638
ENSMUSG00000075590	Nrbp2	27.8	38.36	33.67	30.46	65.69	56.2	55.89	63.59	0.804	4.73843e-06
ENSMUSG00000022895	Ets2	10.67	10.23	12.83	13.97	18.83	23.14	31.05	17.18	0.804	0.0168098
ENSMUSG00000047434	Xxylt1	8.08	11.69	17.23	11.11	25.94	22.41	18.22	20.1	0.804	0.0180901
ENSMUSG00000021806	Nid2	28.77	43.48	48.09	41.92	89.13	80.81	53	74.92	0.805	0.00014095
ENSMUSG00000021193	Pitrm1	15.84	28.5	24.85	13.97	27.62	49.22	31.47	44.22	0.808	0.011676
ENSMUSG00000032041	Tirap	15.84	9.87	16.03	12.9	23.43	28.28	12.01	33.62	0.808	0.0301301
ENSMUSG00000004896	Rrnad1	12.61	11.33	12.42	10.03	23.43	19.84	26.5	17.18	0.81	0.00846143
ENSMUSG00000015968	Cacna1d	22.95	9.87	7.61	13.62	23.43	19.47	23.6	22.66	0.811	0.0311111
ENSMUSG00000023943	Sult1c1	45.9	59.56	58.92	40.49	93.31	94.4	101.44	94.29	0.812	7.76072e-08
ENSMUSG00000033350	Chst2	15.52	14.25	12.42	16.12	17.99	29.02	36.02	25.95	0.815	0.0077093
ENSMUSG00000037458	Azin1	114.44	102.3	151.5	117.88	233.91	212.68	208.67	224.03	0.816	1.40277e-12
ENSMUSG00000015354	Pcolce2	65.62	39.46	48.9	44.43	100.01	76.4	81.98	97.21	0.817	8.45882e-06
ENSMUSG00000029722	Agfg2	22.63	29.6	17.63	21.5	39.33	45.91	45.13	40.2	0.818	0.000230568
ENSMUSG00000031292	Cdkl5	14.55	21.56	14.43	21.86	40.17	29.75	26.5	39.47	0.819	0.003202
ENSMUSG00000032883	Acsl3	102.8	91.34	92.18	80.26	164.86	179.25	177.62	170.3	0.826	6.01913e-14
ENSMUSG00000071866	Ppia	18.1	37.63	41.68	26.16	59.42	47.75	61.69	70.17	0.826	0.00103854
ENSMUSG00000032042	Srpr	21.66	23.02	27.65	21.86	61.93	38.57	41.82	42.76	0.827	0.000325938
ENSMUSG00000038175	Mylip	14.55	22.65	27.65	28.31	59	30.85	49.68	40.2	0.828	0.00524115
ENSMUSG00000021068	Nin	9.37	15.71	12.83	14.33	17.99	27.55	19.87	32.89	0.83	0.0126381
ENSMUSG00000030465	Psd3	42.02	36.17	41.28	44.07	78.25	92.93	73.7	66.15	0.831	9.51786e-07
ENSMUSG00000030621	Me3	30.39	25.21	43.28	31.89	57.74	73.1	62.1	48.61	0.832	0.000141764
ENSMUSG00000087168	Gm15983	8.08	8.04	7.61	5.73	13.81	15.79	12.83	13.52	0.833	0.023472
ENSMUSG00000079465	Col4a3	111.53	79.65	65.33	63.78	134.74	202.02	131.25	130.1	0.834	9.1992e-06
ENSMUSG00000047793	Sned1	27.48	27.77	31.66	27.59	66.11	50.69	50.1	51.53	0.834	9.25409e-06
ENSMUSG00000031394	Opn1mw	13.58	11.69	15.23	13.97	28.04	26.08	28.57	20.83	0.834	0.00206674
ENSMUSG00000022438	Parvb	14.22	16.81	22.84	10.75	28.87	40.4	26.08	25.22	0.835	0.00912444
ENSMUSG00000024502	Jakmip2	90.84	81.84	72.54	75.6	178.67	163.46	133.32	138.51	0.836	1.19392e-09
ENSMUSG00000031365	Zfp275	10.67	12.79	10.42	11.11	20.92	23.51	12.01	26.68	0.836	0.0156729
ENSMUSG00000025203	Scd2	107.97	123.86	153.1	145.47	260.27	205.7	260.42	277.38	0.838	2.08033e-11
ENSMUSG00000058317	Ube2e2	11.96	10.6	11.62	11.47	24.27	23.88	15.32	23.39	0.838	0.00616527
ENSMUSG00000038552	Fndc4	10.99	10.96	16.83	15.05	20.92	26.81	26.08	28.14	0.84	0.0029835
ENSMUSG00000056629	Fkbp2	8.73	16.08	22.84	13.97	31.8	25.34	28.15	28.51	0.842	0.00742196
ENSMUSG00000033439	Trmt13	5.5	12.79	6.01	8.96	16.32	13.22	15.32	16.08	0.842	0.0397063
ENSMUSG00000037490	Slc2a12	29.42	51.52	70.14	57.33	81.6	115.71	89.02	127.55	0.844	0.000213898
ENSMUSG00000019261	Map1s	10.34	16.08	10.02	11.82	17.16	19.1	30.64	25.58	0.845	0.0116259
ENSMUSG00000017677	Wsb1	6.79	12.06	9.22	9.32	17.57	15.06	28.15	14.25	0.845	0.0333382
ENSMUSG00000020687	Cdc27	19.72	14.25	19.64	18.27	46.03	30.85	33.12	30.7	0.846	0.00110766
ENSMUSG00000030616	Sytl2	43.96	46.04	54.91	51.95	105.03	95.5	80.32	95.02	0.847	1.02732e-08
ENSMUSG00000036186	Fam69b	9.05	8.04	12.42	9.67	19.25	21.3	15.32	19	0.851	0.00868825
ENSMUSG00000092274	Neat1	125.43	117.65	124.24	127.91	241.02	221.86	253.8	235.36	0.852	2.09742e-20
ENSMUSG00000021990	Spata13	10.34	15.35	19.64	19.35	43.1	30.49	25.26	28.14	0.853	0.00605789
ENSMUSG00000021763	BC067074	9.7	11.33	16.43	19.35	25.52	23.14	30.64	28.14	0.854	0.00543617
ENSMUSG00000072694	1500011B03Rik	54.63	54.07	56.91	66.29	123.02	113.5	112.61	97.21	0.855	5.89731e-10
ENSMUSG00000030772	Dkk3	46.55	54.44	56.51	68.08	109.63	101.01	103.92	112.93	0.856	1.17198e-09
ENSMUSG00000038349	Plcl1	13.9	23.02	15.63	19.35	37.24	33.43	28.98	38.74	0.858	0.00063634
ENSMUSG00000022124	Fbxl3	16.16	25.94	24.85	21.5	63.6	34.53	39.75	42.39	0.858	0.00112807
ENSMUSG00000037463	Fbxo27	11.31	16.44	19.24	20.78	31.8	34.53	38.09	26.31	0.858	0.00177729
ENSMUSG00000022475	Hdac7	37.18	34.34	38.07	39.41	85.78	70.16	62.1	70.9	0.859	2.6939e-07
ENSMUSG00000049536	Tceal1	11.31	14.61	4.81	8.96	12.97	17.26	24.43	24.49	0.86	0.0408279
ENSMUSG00000000142	Axin2	5.5	9.87	12.42	8.96	20.09	13.59	22.36	14.62	0.861	0.0293146
ENSMUSG00000040711	Sh3pxd2b	18.43	21.19	16.03	23.29	40.59	49.96	35.61	22.29	0.862	0.00313146
ENSMUSG00000010154	Spire2	12.93	17.9	16.43	15.41	27.2	23.51	43.89	31.43	0.864	0.00265474
ENSMUSG00000041688	Amot	13.9	9.87	14.83	16.48	34.31	18	25.26	29.6	0.867	0.00693121
ENSMUSG00000030264	Thumpd3	6.47	7.67	5.21	6.81	10.46	12.86	11.18	16.45	0.868	0.0325634
ENSMUSG00000033386	Frrs1	19.07	21.19	20.84	18.63	46.45	30.85	41.82	36.18	0.87	0.000137514
ENSMUSG00000024454	Hdac3	5.82	13.88	16.03	9.67	24.27	22.41	20.29	23.39	0.872	0.0119205
ENSMUSG00000025358	Cdk2	7.44	26.67	16.43	13.62	33.06	26.08	29.4	27.77	0.872	0.0122827
ENSMUSG00000063760	Rnf217	7.11	12.79	12.02	14.69	17.16	24.24	32.29	18.27	0.872	0.0176556
ENSMUSG00000027570	Col9a3	149.35	206.8	176.35	207.81	368.64	329.85	340.74	427.59	0.873	5.6349e-14
ENSMUSG00000041995	Zbed3	6.47	5.85	10.42	5.02	17.16	12.86	10.76	12.43	0.873	0.0436933
ENSMUSG00000097537	2610020C07Rik	17.78	17.17	16.43	13.26	33.48	33.06	31.05	28.87	0.875	0.000180288
ENSMUSG00000074457	S100a16	42.35	55.17	48.5	52.67	82.01	85.58	104.75	116.22	0.88	3.15267e-08
ENSMUSG00000034543	Morc2a	6.14	8.77	3.21	8.96	13.39	12.86	14.9	13.52	0.881	0.038144
ENSMUSG00000022526	Zfp251	18.43	19.36	26.85	26.87	41.01	47.38	52.17	38.37	0.882	9.93067e-05
ENSMUSG00000028268	Gbp3	24.89	16.81	16.83	18.63	36.82	30.85	43.89	39.83	0.884	0.000267908
ENSMUSG00000019817	Plagl1	8.4	14.25	8.42	12.54	9.62	33.43	18.22	24.85	0.884	0.0456509
ENSMUSG00000037824	Tspan14	23.28	28.86	50.5	37.62	42.26	77.87	58.79	77.48	0.885	0.00123881
ENSMUSG00000035168	Tanc1	15.52	24.48	18.04	23.29	50.21	19.1	39.75	42.39	0.885	0.00391391
ENSMUSG00000029810	Tmem176b	88.9	116.19	113.82	125.05	187.88	243.9	246.35	200.64	0.886	7.49792e-12
ENSMUSG00000039782	Cpeb2	40.41	36.9	34.47	26.51	59.42	85.22	69.14	61.4	0.887	6.6131e-06
ENSMUSG00000063873	Slc24a3	9.37	7.67	5.61	7.52	12.55	18.73	12.83	15.71	0.888	0.0196856
ENSMUSG00000019359	Gdpd2	14.87	6.94	6.41	10.75	19.25	21.3	18.63	14.62	0.888	0.0243706
ENSMUSG00000041891	Lman1	315.51	288.64	288.17	286.64	548.57	583.67	585.02	608.12	0.889	4.03819e-35
ENSMUSG00000027889	Ampd2	13.58	19	16.03	16.48	31.38	36.36	19.05	37.28	0.889	0.00181133
ENSMUSG00000074305	Peak1	12.28	22.29	11.22	17.56	29.29	33.43	19.87	39.83	0.889	0.00752114
ENSMUSG00000042613	Pbxip1	464.53	353.68	328.24	373.71	696.28	729.13	728.27	711.91	0.89	7.96461e-24
ENSMUSG00000046387	Pcdhb17	6.79	10.96	4.41	12.54	15.9	18.73	15.73	19.73	0.892	0.0248271
ENSMUSG00000029270	Fam69a	16.16	11.69	22.44	15.41	34.73	30.12	25.67	37.28	0.893	0.00126867
ENSMUSG00000022656	Nectin3	32.33	31.42	28.06	26.16	42.26	51.42	71.21	66.88	0.894	2.35183e-05
ENSMUSG00000040260	Daam2	10.99	10.96	8.02	8.6	20.5	20.2	12.42	23.39	0.896	0.010371
ENSMUSG00000070867	Trabd2b	22.63	29.96	29.66	25.44	69.04	45.55	57.14	45.68	0.898	3.13714e-05
ENSMUSG00000022843	Clcn2	3.23	17.9	24.45	19.35	38.08	24.24	36.43	44.59	0.904	0.0268952
ENSMUSG00000055254	Ntrk2	96.01	127.88	128.65	117.16	258.18	207.53	240.13	236.09	0.905	7.80129e-16
ENSMUSG00000015335	Zdhhc12	12.28	12.79	15.23	25.08	20.09	31.22	33.54	35.45	0.906	0.00492993
ENSMUSG00000022940	Pigp	5.17	16.81	23.65	12.9	23.85	22.77	32.29	38.74	0.906	0.0255112
ENSMUSG00000031379	Pir	3.88	7.31	7.61	5.73	13.39	12.86	9.11	13.16	0.906	0.0356638
ENSMUSG00000022828	Gtf2e1	11.31	9.87	12.83	11.11	20.92	25.71	21.53	21.93	0.91	0.000954832
ENSMUSG00000068196	Col8a1	1720.74	1993.46	1872.47	1878.57	3596.06	3639.38	3851.27	3832.93	0.911	6.50499e-58
ENSMUSG00000027805	Pfn2	35.24	59.19	60.52	49.45	133.48	100.28	100.19	93.92	0.911	5.13751e-07
ENSMUSG00000022309	Angpt1	19.4	21.56	19.24	21.14	41.01	50.32	23.6	41.3	0.911	0.000383739
ENSMUSG00000028271	Gtf2b	4.2	17.17	16.83	7.88	24.27	18.37	27.74	26.68	0.916	0.0319592
ENSMUSG00000055214	Pld5	58.19	62.11	74.55	71.3	146.45	111.66	143.67	132.3	0.917	1.29037e-11
ENSMUSG00000048895	Cdk5r1	9.05	12.06	13.63	8.24	17.57	22.41	19.46	26.31	0.917	0.00360431
ENSMUSG00000025034	Trim8	22.95	30.33	24.05	29.74	66.95	35.63	58.38	50.43	0.918	8.71933e-05
ENSMUSG00000029587	Zfp12	8.73	3.65	6.01	8.96	15.9	13.96	9.52	16.08	0.918	0.0408698
ENSMUSG00000021750	Fam107a	20.69	15.35	20.84	26.51	50.21	33.06	43.89	41.3	0.92	0.000172219
ENSMUSG00000037656	Slc20a2	10.34	63.57	83.36	67.72	144.78	112.4	137.87	122.43	0.92	0.00273514
ENSMUSG00000022246	Rai14	20.69	32.15	32.86	21.5	62.35	46.28	53.82	52.99	0.924	1.83705e-05
ENSMUSG00000074227	Spint2	12.61	24.85	24.45	22.93	56.07	38.2	46.78	35.08	0.924	0.00059236
ENSMUSG00000031584	Gsr	6.14	21.56	25.65	20.78	39.75	33.79	44.3	46.05	0.924	0.00218928
ENSMUSG00000051339	2900026A02Rik	10.67	9.5	7.61	14.33	24.27	13.59	32.71	18.27	0.925	0.0198961
ENSMUSG00000064289	Tank	12.93	10.23	20.04	8.96	31.38	17.26	24.43	26.68	0.928	0.00840242
ENSMUSG00000036835	Psenen	5.17	7.67	9.62	8.6	12.55	21.3	9.11	19.37	0.928	0.0361486
ENSMUSG00000020644	Id2	139.97	121.3	139.47	141.53	266.96	285.77	253.8	291.64	0.929	3.18281e-23
ENSMUSG00000031762	Mt2	1184.77	1902.85	2204.33	1688.67	4058.86	3397.32	3604.92	3443.35	0.93	1.22693e-14
ENSMUSG00000025488	Cox8b	95.36	114	135.87	110	205.45	234.35	287.75	210.87	0.933	5.03418e-13
ENSMUSG00000047045	Tmem164	11.96	24.11	37.27	18.99	55.23	39.67	42.23	36.91	0.933	0.00257975
ENSMUSG00000063975	Slco1a5	8.08	7.67	12.02	9.67	22.6	15.43	18.22	19.73	0.934	0.00437627
ENSMUSG00000093865	Lrit3	9.7	5.85	9.22	6.09	19.25	19.1	9.52	15.35	0.943	0.0239728
ENSMUSG00000021453	Gadd45g	24.89	21.19	19.64	18.27	41.43	43.71	49.68	38.01	0.944	7.30336e-06
ENSMUSG00000079316	Rab9	10.34	5.85	6.81	8.96	15.48	12.86	17.39	20.47	0.945	0.0109368
ENSMUSG00000069094	Pde7a	13.58	20.1	13.63	23.65	28.45	33.43	38.92	43.49	0.948	0.000455736
ENSMUSG00000047881	Rell1	61.42	72.34	53.71	61.99	92.89	138.11	126.69	143.63	0.951	2.49411e-10
ENSMUSG00000021133	Susd6	3.56	9.87	10.02	7.88	13.81	11.02	20.7	20.1	0.953	0.0313844
ENSMUSG00000058498	Rnf207	9.7	9.87	18.84	8.96	17.57	24.98	26.5	20.47	0.954	0.00510325
ENSMUSG00000003378	Grik5	5.17	11.33	10.42	5.02	26.36	13.22	14.9	14.25	0.957	0.0370234
ENSMUSG00000032482	Cspg5	187.82	493.62	522.63	432.11	968.27	869.81	933.21	988.93	0.959	5.57121e-11
ENSMUSG00000014905	Dnajb9	16.16	31.06	20.84	20.06	38.08	43.34	40.99	50.8	0.959	5.34503e-05
ENSMUSG00000034258	Mfsd7c	63.68	193.65	220.03	164.82	361.95	422.05	327.91	366.92	0.962	7.01406e-07
ENSMUSG00000038780	Smurf1	7.44	8.04	12.83	6.81	18.83	8.45	21.12	21.93	0.964	0.022673
ENSMUSG00000030447	Cyfip1	20.37	24.48	20.04	22.21	49.38	31.96	43.06	54.82	0.965	2.49162e-05
ENSMUSG00000015120	Ube2i	5.82	8.04	6.01	10.03	20.5	15.79	13.25	12.79	0.966	0.013368
ENSMUSG00000033770	Clcnka	35.56	36.9	53.3	31.53	70.72	78.97	74.11	86.98	0.969	2.3264e-08
ENSMUSG00000025223	Ldb1	9.37	11.69	14.43	10.75	22.18	24.61	25.26	23.75	0.969	0.000305455
ENSMUSG00000068523	Gng5	1.94	9.87	15.23	11.47	21.34	14.33	28.57	23.02	0.97	0.0394697
ENSMUSG00000033768	Nrxn2	9.7	10.96	8.02	8.96	13.39	30.85	21.12	17.54	0.972	0.00904615
ENSMUSG00000029233	Srd5a3	6.79	6.94	8.42	4.3	16.74	13.59	14.9	10.23	0.977	0.0162956
ENSMUSG00000021838	Samd4	18.1	14.98	26.85	18.27	35.99	43.71	44.71	34.72	0.979	5.1108e-05
ENSMUSG00000023186	Vwa5a	18.75	9.13	14.83	8.24	28.45	21.67	31.47	21.2	0.979	0.00511443
ENSMUSG00000055172	C1ra	9.05	8.4	7.21	2.87	14.23	13.96	19.05	13.16	0.98	0.0209911
ENSMUSG00000037405	Icam1	5.82	12.06	6.01	4.66	13.39	10.65	14.08	16.81	0.98	0.0264643
ENSMUSG00000032038	St3gal4	15.19	11.33	10.42	11.82	24.69	25.34	28.98	24.49	0.983	0.000197405
ENSMUSG00000070509	Rgma	16.81	20.1	18.44	18.99	63.18	30.85	47.61	27.41	0.983	0.000974077
ENSMUSG00000020538	Srebf1	6.79	22.29	37.27	26.51	61.09	46.65	50.93	45.68	0.983	0.00255363
ENSMUSG00000056749	Nfil3	5.17	2.56	6.41	5.02	11.72	7.71	12.01	9.14	0.985	0.0455295
ENSMUSG00000043496	Tril	14.55	7.31	15.23	9.67	18.41	19.1	31.47	29.97	0.987	0.00541282
ENSMUSG00000020100	Slc29a3	5.82	12.06	7.21	8.96	22.6	12.12	21.53	15.71	0.987	0.0125889
ENSMUSG00000024076	Vit	136.74	101.57	127.85	106.42	254.41	249.41	241.38	241.2	0.99	9.55392e-20
ENSMUSG00000041936	Agrn	15.52	12.79	9.62	10.39	26.36	17.63	31.88	27.41	0.992	0.00148368
ENSMUSG00000038072	Galnt11	5.17	5.48	8.82	10.39	23.43	16.16	9.94	14.62	0.993	0.0269235
ENSMUSG00000060568	Fam78b	11.96	5.12	8.02	6.45	16.32	8.08	21.53	19	0.993	0.0330514
ENSMUSG00000025466	Fuom	54.63	63.94	62.12	55.89	141.01	110.56	129.18	122.79	1.001	4.62263e-15
ENSMUSG00000025534	Gusb	6.14	17.17	8.42	5.37	16.74	18	13.25	18.27	1.004	0.0168812
ENSMUSG00000090698	Apold1	25.86	26.67	24.85	25.8	60.67	48.12	59.21	52.99	1.005	1.21635e-08
ENSMUSG00000021250	Fos	208.18	253.2	268.13	233.61	557.78	492.57	514.63	492.27	1.006	4.84819e-30
ENSMUSG00000024597	Slc12a2	153.87	148.34	140.28	116.09	336.84	260.8	294.37	312.47	1.007	1.25579e-19
ENSMUSG00000035356	Nfkbiz	10.34	23.38	13.63	18.99	35.15	31.22	37.26	36.55	1.013	0.000221353
ENSMUSG00000020287	Mpg	8.4	6.58	5.21	10.39	17.99	11.75	21.94	14.98	1.016	0.0101804
ENSMUSG00000040274	Cdk6	10.34	14.61	8.02	4.3	24.27	21.67	8.28	23.02	1.022	0.0331721
ENSMUSG00000029713	Gnb2	17.13	47.5	53.71	40.85	68.21	76.77	112.61	114.02	1.026	0.000114068
ENSMUSG00000026029	Casp8	6.79	4.75	5.21	8.96	7.53	9.55	19.87	19.37	1.028	0.0404598
ENSMUSG00000079470	Utp14b	14.55	10.23	14.43	13.62	32.64	30.49	24.43	27.41	1.029	6.58057e-05
ENSMUSG00000027822	Slc33a1	5.17	18.63	10.82	11.11	34.31	17.63	14.9	28.87	1.029	0.0236126
ENSMUSG00000030934	Oat	66.27	74.54	87.77	80.62	179.93	148.76	175.13	166.28	1.03	3.66314e-18
ENSMUSG00000038836	Agbl3	6.47	9.87	4.01	8.6	12.13	18.37	9.94	22.66	1.031	0.02306
ENSMUSG00000007613	Tgfbr1	4.85	5.48	11.22	5.37	15.48	8.82	13.66	16.45	1.033	0.0237407
ENSMUSG00000003526	Prodh	26.51	27.77	42.88	30.46	55.23	69.06	65	77.84	1.035	7.53271e-08
ENSMUSG00000071856	Mcc	2.91	4.02	5.21	5.02	8.37	13.96	6.62	8.41	1.035	0.0494762
ENSMUSG00000032182	Yipf2	10.99	21.19	27.25	12.18	21.76	50.69	31.47	43.12	1.036	0.00551121
ENSMUSG00000035798	Zdhhc17	9.37	16.44	7.21	11.82	15.48	30.85	30.64	19.73	1.036	0.00598182
ENSMUSG00000022131	Gpr180	10.34	18.27	23.65	15.41	39.75	32.69	37.26	36.55	1.039	6.86889e-05
ENSMUSG00000040818	Dennd6a	13.25	17.17	15.63	15.05	37.24	38.57	29.81	27.77	1.04	1.84048e-05
ENSMUSG00000033016	Nfatc1	5.82	4.75	4.41	7.88	10.04	14.33	8.69	17.18	1.04	0.0217828
ENSMUSG00000070047	Fat1	4.53	4.75	9.62	6.45	13.81	7.71	16.98	16.81	1.043	0.0252737
ENSMUSG00000050390	C77080	12.61	16.44	26.05	22.21	40.17	48.12	45.13	35.45	1.046	4.35576e-05
ENSMUSG00000028995	Fam126a	6.47	10.6	3.61	8.6	25.52	17.26	10.35	13.89	1.046	0.0267973
ENSMUSG00000025777	Gdap1	12.61	7.31	4.01	9.67	20.5	18.37	25.67	10.96	1.048	0.0196944
ENSMUSG00000021576	Pdcd6	14.55	21.92	18.04	13.97	47.7	16.16	51.75	27.77	1.05	0.00389354
ENSMUSG00000027894	Slc6a17	8.4	3.29	6.81	5.02	10.88	16.16	18.63	6.58	1.054	0.0454113
ENSMUSG00000037306	Man1c1	20.04	22.65	30.46	29.74	49.79	50.69	60.03	66.15	1.055	1.43098e-07
ENSMUSG00000034744	Nagk	23.92	19.73	16.43	19.35	44.77	51.79	36.02	43.86	1.055	1.48625e-06
ENSMUSG00000050875	A730017C20Rik	5.5	7.31	6.41	3.22	7.11	18	9.52	14.98	1.061	0.0344772
ENSMUSG00000040569	Slc26a7	283.83	379.62	383.15	348.98	854.45	787.9	751.46	762.35	1.062	1.36916e-34
ENSMUSG00000027168	Pax6	9.7	10.96	9.22	9.67	20.92	22.41	25.26	19.73	1.064	0.000117987
ENSMUSG00000040548	Tex2	39.12	41.65	40.88	42.64	77.83	97.34	83.63	106.35	1.065	9.89343e-13
ENSMUSG00000036570	Fxyd1	59.8	70.88	56.91	62.7	135.16	123.42	142.42	157.51	1.067	7.51196e-18
ENSMUSG00000040447	Spns2	12.28	15.71	14.43	24.72	50.21	34.9	29.4	31.79	1.07	0.000303301
ENSMUSG00000028497	Hacd4	10.02	12.06	14.83	13.62	31.8	29.75	31.05	19.37	1.071	0.000182247
ENSMUSG00000015027	Galns	4.85	4.38	2.81	6.81	10.04	7.35	13.66	11.69	1.071	0.0277448
ENSMUSG00000028848	Gpn2	3.23	4.02	4.81	3.58	4.6	11.75	9.11	9.5	1.077	0.0457071
ENSMUSG00000038646	Fam103a1	3.88	6.58	7.21	5.02	15.48	10.28	14.49	10.6	1.078	0.010211
ENSMUSG00000078451	Ppil6	2.26	6.58	9.62	5.02	11.3	9.92	16.56	13.89	1.078	0.0301176
ENSMUSG00000030905	Crym	3.23	8.4	6.01	8.96	20.09	16.53	9.94	13.52	1.082	0.0169136
ENSMUSG00000037536	Fbxo34	6.14	11.69	10.82	6.45	17.16	16.53	18.63	26.31	1.083	0.00246459
ENSMUSG00000013921	Clip3	15.84	23.75	21.64	22.57	45.19	47.38	40.99	55.18	1.088	1.54796e-07
ENSMUSG00000028495	Rps6	3.88	5.12	4.81	4.66	10.46	8.08	13.66	9.87	1.092	0.0138608
ENSMUSG00000048668	Rhno1	7.11	4.38	4.81	4.66	17.16	12.49	12.42	3.65	1.092	0.04796
ENSMUSG00000024570	Rbfa	2.91	7.31	5.61	7.17	7.53	16.9	16.98	10.6	1.093	0.0272307
ENSMUSG00000021557	Agtpbp1	246.01	186.7	208.41	218.92	460.28	514.24	434.31	532.47	1.097	3.45289e-27
ENSMUSG00000024098	Twsg1	17.13	22.29	29.26	25.8	55.23	54.36	59.62	44.95	1.097	1.40151e-07
ENSMUSG00000022899	Slc15a2	6.14	6.21	11.62	10.03	23.01	19.1	21.94	13.16	1.098	0.00305054
ENSMUSG00000039126	Prune2	3.56	9.87	9.22	6.81	17.99	8.82	15.32	24.49	1.098	0.0201955
ENSMUSG00000044468	Fam46c	31.03	35.44	28.06	26.51	93.31	61.34	76.59	55.18	1.102	7.46035e-08
ENSMUSG00000026600	Soat1	117.67	136.65	145.89	137.95	299.6	288.71	302.65	339.51	1.107	3.77731e-33
ENSMUSG00000027340	Slc23a2	12.93	13.88	30.86	12.54	18.41	43.71	30.22	41.66	1.107	0.00206998
ENSMUSG00000038546	Ranbp9	4.53	8.04	11.22	7.17	21.76	9.18	22.77	16.08	1.107	0.011676
ENSMUSG00000015341	Golga7	3.88	5.12	5.61	11.47	12.97	11.39	9.52	29.24	1.108	0.0436091
ENSMUSG00000063297	Luzp2	5.17	5.85	5.61	4.3	15.48	9.92	11.59	11.33	1.11	0.00622955
ENSMUSG00000064330	Pde6h	7.11	17.17	23.65	18.99	26.78	41.51	43.47	50.8	1.114	0.000460172
ENSMUSG00000038390	Gpr162	7.44	9.87	11.62	11.82	13.81	26.08	28.98	23.75	1.122	0.000706384
ENSMUSG00000031434	Morc4	2.91	5.12	3.61	5.37	8.37	4.41	14.08	12.79	1.132	0.0464894
[truncated: 278 more rows]
